# Supplementary material for: Genome-scale CRISPR screening at high sensitivity with an empirically designed sgRNA library
Source: BMC Biol. 2020 Nov 23;18:174. doi: 10.1186/s12915-020-00905-1 (PMC7686728; doi:10.1186/s12915-020-00905-1)
Supplement: Supplementary file 10 — Additional file 10: Table S3. BAGEL scores for individual genes in individual screens. [file 12915_2020_905_MOESM10_ESM.xlsx]

## Sheet: BAGEL combined lib.
Gene symbol	Sub-library	bulk	SCC11	SCC12
A1BG	combined	-39.305	-67.447	-54.681
A1CF	combined	-47.212	-60.315	-68.053
A2M	combined	-48.612	-66.062	-57.806
A2ML1	combined	-75.795	-85.897	-74.067
A3GALT2	combined	-74.558	-89.669	-85.632
A4GALT	combined	-65.609	-75.652	-69.145
A4GNT	combined	-36.852	-77.313	-63.525
AAAS	combined	-19.872	-48.453	-43.783
AACS	combined	-37.151	-59.517	-63.842
AADAC	combined	-59.238	-84.597	-85.323
AADACL2	combined	-62.793	-90.08	-77.029
AADACL3	combined	-63.811	-82.277	-84.563
AADACL4	combined	-73.358	-86.097	-96.68
AADAT	combined	-67.167	-82.44	-80.391
AAED1	combined	-51.232	-84.483	-62.867
AAGAB	combined	-20.859	-12.679	-11.101
AAK1	combined	-40.3	-60.335	-44.268
AAMDC	combined	-14.907	-38.227	-29.96
AAMP	combined	49.153	41.29	42.647
AANAT	combined	-34.242	-70.453	-68.151
AAR2	combined	-28.455	-52.698	-30.793
AARD	combined	-48.051	-75.591	-70.041
AARS	combined	44.16	34.224	52.189
AARS2	combined	38.211	46.266	38.244
AASDH	combined	-29.544	-62.614	-50.994
AASDHPPT	combined	51.51	36.562	41.295
AASS	combined	-58.475	-78.34	-87.004
AATF	combined	52.762	34.107	33.92
AATK	combined	-20.336	-40.488	-66.22
ABAT	combined	-30.837	-85.651	-64.57
ABCA1	combined	-60.812	-80.833	-81.84
ABCA10	combined	-66.278	-79.609	-97.292
ABCA12	combined	-54.065	-77.426	-81.517
ABCA13	combined	-52.567	-59.383	-62.18
ABCA2	combined	-53.708	-63.833	-75.116
ABCA3	combined	-30.841	-57.222	-52.195
ABCA4	combined	-46.702	-65.082	-38.683
ABCA5	combined	-48.276	-85.189	-92.205
ABCA6	combined	-72.878	-77.411	-89.402
ABCA7	combined	-44.744	-76.432	-63.563
ABCA8	combined	-35.521	-79.057	-57.127
ABCA9	combined	-68.999	-86.644	-97.084
ABCB1	combined	-35.841	-59.579	-60.016
ABCB10	combined	-51.004	-55.811	-66.416
ABCB11	combined	-58.811	-69.499	-79.158
ABCB4	combined	-33.583	-81.466	-71.823
ABCB5	combined	-56.314	-71.29	-75.473
ABCB6	combined	-51.043	-84.43	-81.461
ABCB7	combined	39.787	37.293	30.921
ABCB8	combined	-34.95	-56.604	-49.747
ABCB9	combined	-50.525	-73.735	-62.944
ABCC1	combined	-43.031	-72.604	-53.755
ABCC10	combined	-26.508	-65.771	-71.298
ABCC11	combined	-41.292	-78.171	-65.142
ABCC12	combined	-54.276	-67.09	-78.549
ABCC2	combined	-47.989	-61.302	-62.163
ABCC3	combined	-48.977	-83.608	-85.505
ABCC4	combined	-75.979	-87.689	-80.293
ABCC5	combined	-45.19	-80.612	-69.605
ABCC6	combined	-23.871	-41.31	-48.027
ABCC8	combined	-58.817	-64.538	-68.297
ABCC9	combined	-44.951	-73.177	-79.262
ABCD1	combined	-49.838	-67.428	-66.375
ABCD2	combined	-59.365	-72.513	-51.639
ABCD3	combined	-51.767	-89.785	-72.582
ABCD4	combined	-49.407	-43.284	-36.804
ABCE1	combined	42.222	53.488	57.647
ABCF1	combined	25.246	32.197	39.486
ABCF2	combined	-23.967	-54.892	-78.271
ABCF3	combined	-51.426	-81.081	-66.219
ABCG1	combined	-56.661	-68.24	-77.498
ABCG2	combined	-55.43	-95.696	-78.546
ABCG4	combined	-61.876	-65.345	-86.97
ABCG5	combined	-53.045	-71.218	-29.371
ABCG8	combined	-41.186	-74.098	-54.165
ABHD1	combined	-46.002	-90.305	-83.712
ABHD10	combined	-59.452	-61.96	-59.771
ABHD11	combined	30.936	23.657	20.733
ABHD12	combined	-40.871	-75.983	-66.118
ABHD12B	combined	-35.689	-38.441	-41.59
ABHD13	combined	-62.585	-87.731	-96.236
ABHD14B	combined	-41.663	-72.911	-61.756
ABHD15	combined	-41.661	-52.022	-56.549
ABHD16A	combined	-34.631	-62.901	-54.697
ABHD16B	combined	-66.728	-75.257	-74.887
ABHD17A	combined	-28.992	-53.18	-55.565
ABHD17B	combined	-55.584	-78.726	-63.515
ABHD17C	combined	-34.755	-41.121	-68.805
ABHD18	combined	-21.802	-62.204	-34.165
ABHD2	combined	-42.016	-56.623	-33.021
ABHD3	combined	-51.548	-70.585	-66.886
ABHD4	combined	-66.491	-77.885	-81.3
ABHD5	combined	-56.079	-69.765	-64.159
ABHD6	combined	-52.628	-77.848	-80.465
ABHD8	combined	-50.078	-70.831	-66.158
ABI1	combined	-37.597	-66.023	-74.209
ABI2	combined	-49.682	-68.957	-59.575
ABI3	combined	-29.107	-57.156	-62.05
ABI3BP	combined	-52.011	-79.558	-61.011
ABL1	combined	-33.844	-70.132	-60.073
ABL2	combined	-52.134	-72.707	-85.807
ABLIM1	combined	-44.17	-69.806	-79.093
ABLIM2	combined	-55.165	-73.572	-79.517
ABLIM3	combined	-69.025	-75.874	-92.797
ABO	combined	-59.271	-75.155	-80.777
ABR	combined	-62.16	-78.821	-69.673
ABRA	combined	-50.418	-79.651	-80.348
ABRACL	combined	-71.523	-85.281	-96.765
ABT1	combined	44.339	30.203	23.608
ABTB1	combined	-59.14	-79.282	-65.766
ABTB2	combined	-53.293	-83.999	-81.921
ACAA1	combined	-55.517	-76.049	-91.371
ACAA2	combined	-61.536	-87.485	-84.228
ACACA	combined		-15.742	5.832
ACACA	combined	27.219
ACACB	combined	-38.203	-79.195	-80.46
ACAD10	combined	-21.637	-36.945	-49.041
ACAD11	combined	-47.466	-79.798	-72.016
ACAD8	combined	-74.257	-95.022	-85.455
ACAD9	combined	-4.482	-22.873	-25.201
ACADL	combined	-56.436	-71.226	-76.287
ACADM	combined	-47.743	-77.239	-71.407
ACADS	combined	-51.644	-87.92	-93.015
ACADSB	combined	-40.812	-90.647	-79.909
ACADVL	combined	-14.711	-37.412	-63.784
ACAN	combined	-7.319	-35.792	-15.654
ACAP1	combined	-50.847	-64.798	-62.008
ACAP2	combined	-58.575	-68.2	-77.273
ACAP3	combined	-9.36	-47.397	-46.139
ACAT1	combined	-69.025	-60.701	-88.625
ACAT2	combined	-60.998	-55.309	-68.995
ACBD3	combined	-46.002	-60.077	-54.433
ACBD4	combined	-12.747	-37.264	-44.437
ACBD5	combined	-28.271	-82.772	-71.88
ACBD6	combined	-44.178	-74.677	-85.149
ACBD7	combined	-48.055	-75.778	-83.671
ACCS	combined	-50.096	-50.093	-52.791
ACCSL	combined	-30.847	-52.114	-44.845
ACD	combined	-23.419	-49.841	-36.231
ACE	combined	-44.634	-66.779	-76.72
ACE2	combined	-55.972	-90.203	-79.48
ACER1	combined	-42.605	-71.013	-70.096
ACER2	combined	-69.658	-88.527	-90.317
ACER3	combined	-53.055	-73.896	-87.051
ACHE	combined	-33.65	-70.61	-68.558
ACIN1	combined			1.842
ACIN1	combined	23.59	24.172
ACKR1	combined	-50.037	-91.938	-82.827
ACKR2	combined	-49.072	-65.896	-59.154
ACKR3	combined	-63.414	-80.059	-90.091
ACKR4	combined	-31.583	-59.997	-45.117
ACLY	combined	50.118	46.805	51.983
ACMSD	combined	-60.068	-67.523	-62.46
ACO1	combined	-64.938	-57.075	-74.009
ACO2	combined			-10.654
ACO2	combined	18.325	40.054
ACOD1	combined	-62.446	-85.111	-88.037
ACOT1	combined	-65.325	-87.569	-89.795
ACOT11	combined	-38.8	-85.252	-75.975
ACOT12	combined	-24.749	-60.827	-55.066
ACOT13	combined	-55.643	-91.391	-89.069
ACOT2	combined	-47.907	-75.926	-53.634
ACOT4	combined	-47.496	-68.623	-77.969
ACOT6	combined	-16.945	-36.381	-34.963
ACOT7	combined	-61.966	-77.334	-65.981
ACOT8	combined	-67.522	-85.494	-81.936
ACOT9	combined	-50.038	-65.967	-85.294
ACOX1	combined	-50.554	-91.07	-73
ACOX2	combined	-57.948	-66.323	-69.272
ACOX3	combined	-55.857	-83.142	-90.971
ACOXL	combined	-14.934	-51.131	-38.438
ACP1	combined	-63.634	-93.816	-93.555
ACP2	combined	-25.111	-50.655	-64.566
ACP5	combined	-12.136	-56.74	-45.096
ACP6	combined	-73.238	-69.457	-62.394
ACP7	combined	-14.21	-63.2	-43.177
ACPP	combined	-48.028	-82.142	-64.085
ACPT	combined	-42.933	-70.505	-59.938
ACR	combined	-38.743	-53.845	-50.714
ACRBP	combined	-33.071	-35.831	-36.627
ACRV1	combined	-67.56	-96.506	-94.731
ACSBG1	combined	-27.669	-65.662	-54.143
ACSBG2	combined	-61.007	-81.039	-77.705
ACSF2	combined	-30.971	-53.333	-64.34
ACSF3	combined	-38.269	-73.657	-66.022
ACSL1	combined	-69.576	-85.644	-91.882
ACSL3	combined	-59.737	-87.85	-68.215
ACSL4	combined	-54.871	-66.771	-79.709
ACSL5	combined	-46.762	-71.128	-75.055
ACSL6	combined	-20.179	-31.164	-30.305
ACSM1	combined	-58.795	-72.166	-71.426
ACSM2A	combined	-73.377	-59.477	-80.885
ACSM2B	combined	-55.06	-77.66	-68.287
ACSM3	combined	-53.279	-61.66	-62.172
ACSM4	combined	-62.982	-86.106	-85.064
ACSM5	combined	-55.506	-69.668	-79.442
ACSM6	combined	-55.676	-83.586	-79.589
ACSS1	combined	-69.45	-90.137	-82.304
ACSS2	combined	-36.194	-61.275	-60.99
ACSS3	combined	-62.561	-75.473	-69.478
ACTA1	combined	-55.223	-67.692	-74.338
ACTA2	combined	-56.104	-73.875	-79.314
ACTB	combined	17.07	39.954	7.959
ACTBL2	combined	-61.687	-86.285	-59.661
ACTC1	combined	-44.93	-66.842	-38.499
ACTG1	combined			0.905
ACTG1	combined	9.315	18.945
ACTG2	combined	-30.595	-39.395	-37.339
ACTL10	combined	-44.52	-81.265	-85.295
ACTL6A	combined	54.733	50.312	45.862
ACTL6B	combined	-50.002	-86.71	-63.888
ACTL7A	combined	-58.69	-64.688	-57.036
ACTL7B	combined	-53.324	-65.826	-86.49
ACTL8	combined	-55.914	-74.887	-75.999
ACTL9	combined	-40.186	-59.523	-68.096
ACTN1	combined	-45.848	-80.138	-74.715
ACTN2	combined	-56.484	-62.373	-79.333
ACTN3	combined	-51.439	-71.08	-72.775
ACTN4	combined	-57.632	-76.151	-78.034
ACTR10	combined	55.525	36.403	41.252
ACTR1A	combined	52.797	36.736	46.053
ACTR1B	combined	-38.744	-63.951	-53.94
ACTR2	combined	59.313	51.955	51.604
ACTR3	combined	34.835	40.912	38.381
ACTR3B	combined	-57.101	-75.031	-65.248
ACTR3C	combined	-56.532	-72.038	-67.904
ACTR5	combined	21.273	30.408	19.566
ACTR6	combined		3.987
ACTR6	combined	37.65		13.734
ACTR8	combined	44.006	36.201	35.903
ACTRT1	combined	-52.05	-88.714	-93.986
ACTRT2	combined	-71.529	-93.491	-99.6
ACTRT3	combined	-45.45	-75.309	-49.965
ACVR1	combined	-47.188	-45.396	-74.132
ACVR1B	combined	-43.073	-68.905	-83.248
ACVR1C	combined	-70.226	-82.765	-78.649
ACVR2A	combined	-45.247	-42.619	-60.627
ACVR2B	combined	-44.77	-75.446	-88.283
ACVRL1	combined	-55.864	-65.711	-61.754
ACY3	combined	-29.633	-72.019	-65.773
ACYP1	combined	-38.015	-85.098	-96.35
ACYP2	combined	-44.589	-58.694	-81.975
ADA	combined	-45.715	-79.936	-81.592
ADAD1	combined	-55.025	-87.626	-85.325
ADAD2	combined	-55.817	-72.441	-81.447
ADAL	combined	-26.522	-44.755	-35.605
ADAM10	combined	-67.913	-95.03	-95.268
ADAM11	combined	-26.645	-44.446	-51.375
ADAM12	combined	-62.68	-89.481	-81.723
ADAM15	combined	-38.436	-60.416	-51.276
ADAM17	combined	-55.492	-78.256	-82.397
ADAM18	combined	-61.761	-51.707	-50.082
ADAM19	combined	-70.783	-78.654	-80.987
ADAM2	combined	-45.664	-72.539	-64.731
ADAM20	combined	-66.045	-91.773	-96.16
ADAM21	combined	-53.896	-67.3	-69.87
ADAM22	combined	-57.251	-65.434	-66.487
ADAM23	combined	-58.33	-85.726	-84.238
ADAM28	combined	-52.579	-86.522	-83.093
ADAM29	combined	-76.546	-83.642	-96.752
ADAM30	combined	-44.415	-64.963	-61.698
ADAM32	combined	-60.755	-60.74	-77.564
ADAM33	combined	-40.713	-55.68	-38.775
ADAM7	combined	-50.401	-67.698	-67.717
ADAM8	combined	-70.479	-80.955	-92.546
ADAM9	combined	-13.746	-43.145	-52.075
ADAMDEC1	combined	-67.479	-77.713	-87.467
ADAMTS1	combined	-51.768	-67.675	-72.648
ADAMTS10	combined	-33.902	-74.447	-67.08
ADAMTS12	combined	-65.398	-75.39	-71.483
ADAMTS13	combined	-29.268	-68.742	-64.022
ADAMTS14	combined	-46.473	-75.376	-79.207
ADAMTS15	combined	-80.266	-85.282	-94.449
ADAMTS16	combined	-59.677	-82.443	-75.369
ADAMTS17	combined	-66.536	-90.923	-89.162
ADAMTS18	combined	-72.673	-84.004	-90.813
ADAMTS19	combined	-71.191	-87.392	-92.169
ADAMTS2	combined	-38.488	-64.375	-72.633
ADAMTS20	combined	-40.05	-66.632	-53.615
ADAMTS3	combined	-41.514	-65.535	-59.054
ADAMTS4	combined	-41.783	-58.017	-51.523
ADAMTS5	combined	-42.607	-73.241	-68.922
ADAMTS6	combined	-47.665	-74.58	-64.048
ADAMTS7	combined	-19.206	-39.638	-13.539
ADAMTS8	combined	-54.378	-81.581	-86.383
ADAMTS9	combined	-67.581	-80.433	-78.002
ADAMTSL1	combined	-53.829	-78.047	-81.843
ADAMTSL2	combined	-60.696	-94.342	-79.035
ADAMTSL3	combined	-39.508	-48.66	-50.594
ADAMTSL4	combined	-54.677	-62.198	-41.194
ADAMTSL5	combined	-40.858	-67.126	-67.569
ADAP1	combined	-49.079	-77.957	-77.972
ADAP2	combined	-35.25	-45.203	-50.825
ADAR	combined	-34.287	-74.412	-72.092
ADARB1	combined	-43.805	-86.987	-67.423
ADARB2	combined	-57.59	-72.105	-73.228
ADAT1	combined	-65.231	-91.424	-79.771
ADAT2	combined	25.221	49.595	48.538
ADAT3	combined	44.094	43.465	44.763
ADCK1	combined	-61.585	-81.471	-86.16
ADCK2	combined	-49.391	-66.941	-74.747
ADCK5	combined	-33.304	-63.349	-66.534
ADCY1	combined	-39.883	-84.601	-88.363
ADCY10	combined	-31.379	-78.354	-74.756
ADCY2	combined	-65.096	-87.537	-85.235
ADCY3	combined	-52.278	-61.204	-73.017
ADCY4	combined	-13.695	-44.278	-45.337
ADCY5	combined	-44.279	-75.416	-67.491
ADCY6	combined	-36.347	-54.762	-62.59
ADCY7	combined	-42.531	-88.621	-82.135
ADCY8	combined	-39.595	-75.273	-86.088
ADCY9	combined	-32.072	-74.443	-80.913
ADCYAP1	combined	-63.954	-72.067	-84.957
ADCYAP1R1	combined	-44.982	-70.214	-58.707
ADD1	combined	-34.54	-71.347	-57.904
ADD2	combined	-36.03	-38.353	-27.402
ADD3	combined	-45.259	-73.246	-66.867
ADGB	combined	-49.708	-69.812	-80.368
ADGRA1	combined	-72.832	-89.488	-94.941
ADGRA2	combined	-33.193	-60.916	-72.842
ADGRA3	combined	-65.648	-80.912	-77.744
ADGRB1	combined	-70.822	-67.991	-81.04
ADGRB2	combined	-12.097	-16.494	-24.842
ADGRB3	combined	-60.911	-82.916	-78.911
ADGRD1	combined	-59.839	-78.751	-87.931
ADGRE1	combined	-55.041	-79.3	-91.222
ADGRE2	combined	-46.955	-80.565	-54.11
ADGRE3	combined	-66.104	-87.684	-75.547
ADGRE5	combined	-51.591	-76.401	-70.503
ADGRF1	combined	-32.386	-40.131	-37.116
ADGRF3	combined	-52.717	-50.829	-55.752
ADGRF4	combined	-63.667	-77.909	-87.033
ADGRF5	combined	-53.713	-66.824	-70.47
ADGRG1	combined	-41.793	-78.209	-60.212
ADGRG2	combined	-29.92	-61.143	-74.537
ADGRG3	combined	-51.734	-68.521	-72.276
ADGRG4	combined	-64.871	-77.693	-81.708
ADGRG5	combined	-46.142	-68.815	-56.571
ADGRG6	combined	-51.329	-66.912	-68.681
ADGRG7	combined	-53.958	-76.318	-77.171
ADGRL1	combined	-42.778	-76.576	-71.901
ADGRL2	combined	-62.524	-80.119	-80.959
ADGRL3	combined	-27.8	-62.719	-58
ADGRL4	combined	-55.552	-71.526	-80.769
ADGRV1	combined	-38.687	-69.452	-63.996
ADH1A	combined	-51.646	-79.928	-81.948
ADH1B	combined	-40.976	-79.079	-89.586
ADH1C	combined	-47.968	-83.105	-96.97
ADH4	combined	-38.404	-74.224	-76.652
ADH5	combined	-22.242	-52.644	-22.081
ADH6	combined	-51.423	-87.505	-88.246
ADH7	combined	-53.362	-86.396	-81.797
ADHFE1	combined	-18.702	-39.399	-48.01
ADI1	combined	-39.567	-58.657	-62.382
ADIG	combined	-48.375	-82.44	-70.767
ADIPOQ	combined	-61.132	-70.048	-93.025
ADIPOR1	combined	-9.462	-59.909	-24.132
ADIPOR2	combined	-69.006	-92.82	-87.647
ADIRF	combined	-31.3	-66.632	-62.19
ADK	combined	-40.22	-56.042	-70.033
ADM	combined	-52.413	-85.859	-76.123
ADM2	combined	-41.069	-59.07	-66.181
ADM5	combined	-22.703	-62.548	-65.027
ADNP	combined	-28.092	-58.792	-29.581
ADNP2	combined	-34.924	-96.37	-85.434
ADO	combined	-44.98	-56.067	-51.039
ADORA1	combined	-48.214	-85.366	-90.756
ADORA2A	combined	-25.356	-31.632	-44.758
ADORA2B	combined	-43.762	-77.797	-75.923
ADORA3	combined	-14.235	-28.634	-22.901
ADPGK	combined	-21.869	-56.951	-36.419
ADPRH	combined	-36.776	-67.631	-56.944
ADPRHL1	combined	-50.868	-83.32	-86.796
ADPRHL2	combined	-38.084	-56.181	-65.468
ADPRM	combined	-64.263	-91.359	-85.053
ADRA1A	combined	-67.948	-92.275	-83.368
ADRA1B	combined	-67.218	-83.427	-94.193
ADRA1D	combined	-36.609	-53.228	-60.511
ADRA2A	combined	-60.828	-82.376	-81.092
ADRA2B	combined	-57.435	-76.692	-66.338
ADRA2C	combined	-59.497	-88.014	-86.393
ADRB1	combined	-66.743	-83.769	-93.982
ADRB2	combined	-56.483	-91.879	-84.725
ADRB3	combined	-54.903	-56.776	-64.883
ADRM1	combined	-21.665	-42.907	-23.627
ADSL	combined	62.947	53.573	56.12
ADSS	combined	51.891	46.837	50.48
ADSSL1	combined	-54.05	-79.878	-87.003
ADTRP	combined	-63.552	-92.273	-76.439
AEBP1	combined	-38.553	-53.776	-57.47
AEBP2	combined	-33.254	-41.442	-49.485
AEN	combined	-7.457	-41.291	-2.313
AES	combined	-56.275	-68.021	-64.234
AFAP1	combined	-58.929	-75.864	-58.366
AFAP1L1	combined	-36.557	-52.554	-57.969
AFAP1L2	combined	-20.748	-53.842	-32.641
AFDN	combined	-80.808	-86.013	-104.43
AFF1	combined	-49.749	-76.492	-87.067
AFF2	combined	-72.394	-93.404	-83.606
AFF3	combined	-37.498	-62.61	-59.803
AFF4	combined	-42.878	-72.545	-76.731
AFG3L2	combined	38.339	35.15	25.526
AFM	combined	-53.036	-83.454	-69.61
AFMID	combined	-51.373	-73.531	-79.986
AFP	combined	-54.475	-86.476	-90.62
AFTPH	combined	-64.188	-64.876	-60.757
AGA	combined	-60.448	-57.041	-78.982
AGAP1	combined	-73.581	-98.823	-94.765
AGAP2	combined		-34.031	-28.404
AGAP2	combined	7.167
AGAP3	combined	-49.502	-84.603	-79.855
AGAP4	combined	47.03	32.913	33.72
AGAP5	combined	29.273	26.189	27.677
AGAP6	combined	28.391	34.649	43.424
AGAP9	combined		-1.587	1.348
AGAP9	combined	8.073
AGBL1	combined	-23.164	-63.882	-49.059
AGBL2	combined	-12.959	-51.254	-39.993
AGBL3	combined	-52.345	-75.24	-76.838
AGBL4	combined	-37.914	-70.948	-69.185
AGBL5	combined	-51.519	-63.262	-65.044
AGER	combined	-51.975	-56.349	-74.546
AGFG1	combined	-30.261	-54.156	-48.426
AGFG2	combined	-55.363	-72.902	-70.113
AGGF1	combined	-18.305	-34.894	-41.815
AGK	combined	-13.821	-28.828	-41.11
AGL	combined	-45.121	-86.746	-84.171
AGMAT	combined	-53.56	-65.337	-62.34
AGMO	combined	-46.177	-81.566	-94.555
AGO1	combined	-50.735	-80.423	-79.201
AGO2	combined	-19.532	-73.242	-61.016
AGO3	combined	-44.627	-67.091	-68.494
AGO4	combined	-37.628	-60.124	-41.126
AGPAT1	combined	-32.708	-70.042	-65.166
AGPAT2	combined	-47.583	-73.55	-81.26
AGPAT3	combined	-48.064	-77.577	-45.73
AGPAT4	combined	-50.539	-79.939	-90.264
AGPAT5	combined	-10.801	-74.315	-42.767
AGPS	combined	-32.439	-84.182	-86.474
AGR2	combined	-61.599	-73.434	-80.323
AGR3	combined	-42.29	-65.259	-71.721
AGRN	combined	-49.101	-87.17	-88.172
AGRP	combined	-49.927	-75.209	-69.034
AGT	combined	-44.865	-79.006	-91.244
AGTPBP1	combined	-68.876	-83.302	-69.435
AGTR1	combined	-36.911	-77.898	-60.2
AGTR2	combined	-70.626	-90.688	-91.243
AGTRAP	combined	-64.232	-78.043	-78.068
AGXT	combined	-53.454	-53.455	-82.731
AGXT2	combined	-49.577	-80.364	-76.857
AHCTF1	combined	36.408	33.007	30.986
AHCY	combined	43.99	52.029	57.637
AHCYL1	combined	-29.597	-26.393	-48.676
AHCYL2	combined	-62.347	-81.273	-71.077
AHDC1	combined	-57.26	-78.244	-88.239
AHI1	combined	-52.394	-72.055	-73.313
AHNAK	combined	-33.665	-44.545	-66.584
AHNAK2	combined	-67.882	-92.347	-81.442
AHR	combined	-19.714	-30.427	-40.874
AHRR	combined	-51.852	-73.228	-67.29
AHSA1	combined	-35.553	-64.529	-82.364
AHSA2	combined	-35.821	-69.74	-52.941
AHSG	combined	-62.559	-65.328	-86.205
AHSP	combined	-48.384	-76.414	-75.8
AICDA	combined	-49.71	-88.741	-78.588
AIDA	combined	-26.345	-63.12	-61.904
AIF1	combined	-51.005	-83.143	-68.415
AIF1L	combined	-42.869	-67.346	-60.605
AIFM1	combined	40.037	45.401	48.011
AIFM2	combined	-51.491	-67.77	-43.843
AIFM3	combined	-57.216	-72.125	-71.063
AIG1	combined	-59.048	-79.742	-68.845
AIM2	combined	-65.866	-80.617	-73.693
AIMP1	combined	-30.758	-57.257	-64.726
AIMP2	combined	-34.401	-60.75	-82.059
AIP	combined	-35.144	-29.567	-23.055
AIPL1	combined	-42.927	-69.87	-62.354
AIRE	combined	-63.641	-88.457	-90.346
AJAP1	combined	-44.828	-68.666	-68.233
AJUBA	combined	-28.969	-74.757	-75.02
AK1	combined	-57.095	-51.329	-59.637
AK2	combined	41.637	53.516	44.398
AK3	combined	-55.019	-77.693	-84.741
AK4	combined	-29.649	-41.907
AK4	combined			10.216
AK5	combined	-54.071	-70.285	-83.814
AK6	combined	58.864	53.493	55.331
AK7	combined	-57.088	-80.172	-96.486
AK8	combined	-39.791	-80.461	-70.822
AK9	combined	-56.224	-83.619	-75.237
AKAIN1	combined	-69.961	-87.747	-90.058
AKAP1	combined	-43.477	-59.94	-65.29
AKAP10	combined	-60.065	-70.307	-71.757
AKAP11	combined	-56.085	-76.802	-61.945
AKAP12	combined	-44.305	-71.649	-81.577
AKAP13	combined	-27.838	-68.039	-61.163
AKAP14	combined	-59.847	-96.037	-94.861
AKAP17A	combined	-57.611	-90.871	-74.486
AKAP3	combined	-58.007	-71.286	-66.107
AKAP4	combined	-82.8	-76.965	-98.085
AKAP5	combined	-30.814	-62.442	-51.057
AKAP6	combined	-47.524	-74.678	-81.105
AKAP7	combined	-45.249	-87.12	-84.341
AKAP8	combined	-43.989	-63.676	-75.56
AKAP8L	combined	-5.222	-24.984	-32.447
AKAP9	combined	-52.509	-71.291	-82.933
AKIP1	combined	-46.706	-56.052	-76.602
AKIRIN1	combined	-26.754	-49.339	-53.16
AKIRIN2	combined	22.173	22.208	14.285
AKNA	combined	-59.865	-74.33	-79.368
AKNAD1	combined	-21.991	-49.183	-55.709
AKR1A1	combined	-25.967	-68.329	-43.204
AKR1B1	combined	-63.525	-82.145	-86.875
AKR1B10	combined	-55.361	-80.797	-92.314
AKR1B15	combined	-55.738	-65.331	-75.564
AKR1C1	combined	-34.915	-42.952	-45.962
AKR1C2	combined	-58.697	-82.088	-85.237
AKR1C3	combined	-54.412	-71.034	-77.523
AKR1C4	combined	-58.332	-79.126	-91.995
AKR1D1	combined	-54.214	-82.282	-88.574
AKR1E2	combined	-66.753	-78.701	-83.516
AKR7A2	combined	-56.517	-85.243	-89.404
AKR7A3	combined	-34.022	-61.699	-69.728
AKT1	combined	-55.235	-74.354	-83.677
AKT1S1	combined	-25.581	-63.108	-50.176
AKT2	combined	-27.938	-49.175	-44.73
AKT3	combined	-24.826	-69.529	-56.899
AKTIP	combined	-37.596	-66.39	-60.642
ALAD	combined	-20.025	-50.793	-53.404
ALAS1	combined	-44.661	-74.007	-82.623
ALAS2	combined	-73.137	-90.775	-93.518
ALB	combined	-45.958	-75.625	-67.751
ALCAM	combined	-53.04	-60.165	-63.361
ALDH16A1	combined	-59.995	-69.704	-84.646
ALDH18A1	combined	-5.866	-14.394	-42
ALDH1A1	combined	-57.124	-76.333	-82.824
ALDH1A2	combined	-55.166	-76.659	-90.174
ALDH1A3	combined	-60.766	-82.697	-88.172
ALDH1B1	combined	-27.843	-69.674	-71.65
ALDH1L1	combined	-33.951	-64.702	-66.064
ALDH1L2	combined	-45.262	-73.102	-63.47
ALDH2	combined	-23.676	-43.579	-30.194
ALDH3A1	combined	-44.999	-78.062	-61.672
ALDH3A2	combined	-56.443	-94.203	-78.984
ALDH3B1	combined	-32.45	-59.541	-54.032
ALDH3B2	combined	-29.643	-56.103	-46.523
ALDH4A1	combined	-58.647	-85.535	-82.058
ALDH5A1	combined	-44.399	-65.754	-74.787
ALDH6A1	combined	-60.778	-77.156	-70.942
ALDH7A1	combined	-53.536	-82.716	-74.442
ALDH8A1	combined	-56.904	-66.635	-54.624
ALDH9A1	combined	-52.143	-79.38	-90.126
ALDOA	combined	49.581	50.437	53.516
ALDOB	combined	-67.258	-92.618	-95.4
ALDOC	combined	-38.77	-45.559	-26.986
ALG1	combined	46.758	53.318	57.095
ALG10	combined	2.139	-0.258
ALG10	combined			10.733
ALG10B	combined	-2.217	-30.26	-31.53
ALG11	combined	34.911	30.042	47.387
ALG12	combined	-49.878	-75.821	-56.066
ALG13	combined	39.727	31.703	26.814
ALG14	combined	53.694	43.522	45.652
ALG1L	combined	-1.342	-1.644	-1.234
ALG1L2	combined	-11.295	-13.94	-14.191
ALG2	combined	55.289	44.053	45.762
ALG3	combined	-44.712	-64.627	-60.628
ALG5	combined	-29.669	-11.738	-27.59
ALG6	combined	-18.147	-19.129	-36.153
ALG8	combined	-24.158	-15.278	-17.943
ALG9	combined	-16.83	-22.469	-41.251
ALK	combined	-50.953	-73.205	-80.5
ALKBH1	combined	-26.336	-65.374	-45.492
ALKBH2	combined	-65.173	-80.95	-73.742
ALKBH3	combined	-15.535	-63.514	-53.261
ALKBH4	combined	-46.641	-76.316	-57.579
ALKBH5	combined	-15.731	-30.498	-53.077
ALKBH6	combined	-41.296	-55.368	-56.422
ALKBH7	combined	-39.298	-67.554	-54.385
ALKBH8	combined	-31.268	-24.164	-45.913
ALLC	combined	-65.868	-76.014	-66.647
ALMS1	combined	-23.059	-54.082	-35.277
ALOX12	combined	-63.274	-81.262	-85.814
ALOX12B	combined	-47.347	-58.829	-64.98
ALOX15	combined	-60.444	-77.355	-62.176
ALOX15B	combined	-51.515	-54.558	-41.432
ALOX5	combined	-50.348	-75.511	-69.083
ALOX5AP	combined	-56.139	-68.54	-60.156
ALOXE3	combined	-32.844	-84.095	-60.176
ALPI	combined	-52.883	-82.428	-74.069
ALPK1	combined	-47.905	-73.936	-49.13
ALPK2	combined	-65.12	-84.222	-97.101
ALPK3	combined	-27.619	-29.797	-50.682
ALPL	combined	-50.615	-65.635	-71.623
ALPP	combined	-73.451	-81.363	-75.396
ALPPL2	combined	-58.267	-86.113	-93.23
ALS2	combined	-20.718	-75.925	-70.741
ALS2CL	combined	-13.853	-35.333	-46.019
ALS2CR12	combined	-66.311	-89.675	-82.765
ALX1	combined	-49.548	-79.063	-86.535
ALX3	combined	-19.067	-57.621	-51.955
ALX4	combined	-57.058	-72.506	-80.873
ALYREF	combined	19.161	43.683	35.99
AMACR	combined	-67.534	-78.638	-90.876
AMBN	combined	-38.465	-50.856	-43.794
AMBP	combined	-42.476	-50.488	-65.454
AMBRA1	combined	-84.414	-92.979	-97.183
AMD1	combined	29.291	47.707	44.022
AMDHD1	combined	-52.12	-79.765	-79.756
AMDHD2	combined	-58.84	-70.344	-63.006
AMELX	combined	-64.888	-94.118	-99.248
AMELY	combined	-75.561	-93.818	-102.055
AMER1	combined	-73.733	-75.254	-81.96
AMER2	combined	-27.17	-62.647	-71.56
AMER3	combined	-43.058	-51.641	-60.41
AMFR	combined	-50.574	-72.758	-71.345
AMH	combined	-55.802	-68.276	-57.28
AMHR2	combined	-30.144	-73.233	-56.946
AMIGO1	combined	-24.234	-71.398	-22.488
AMIGO2	combined	-28.789	-83.172	-80.187
AMIGO3	combined	-24.901	-59.675	-42.342
AMMECR1	combined	-64.802	-76.796	-84.315
AMMECR1L	combined	-26.821	-73.355	-54.303
AMN	combined	-51.235	-72.494	-83.573
AMN1	combined	-54.287	-67.025	-64.655
AMOT	combined	-55.989	-78.81	-83.909
AMOTL1	combined	-61.144	-83.805	-71.339
AMOTL2	combined	-53.065	-76.504	-78.784
AMPD1	combined	-43.211	-69.204	-62.206
AMPD2	combined	-38.534	-79.38	-60.263
AMPD3	combined	-40.441	-70.069	-75.093
AMPH	combined	-58.161	-76.216	-77.235
AMT	combined	-58.914	-36.602	-66.822
AMTN	combined	-62.86	-70.897	-85.847
AMY1B	combined	-23.004	-31.776	-31.242
AMY2A	combined	-42.792	-45.103	-33.488
AMY2B	combined	-3.719	-10.542	-6.306
AMZ1	combined	-54.51	-73.388	-79.823
AMZ2	combined	-49.846	-90.453	-72.581
ANAPC1	combined	46.753	51.953	54.058
ANAPC10	combined	53.923	45.843	40.674
ANAPC11	combined	48.777	53.497	57.511
ANAPC13	combined		-1.71	-27.016
ANAPC13	combined	28.294
ANAPC15	combined	52.521	39.31	30.195
ANAPC16	combined	-59.349	-69.244	-79.642
ANAPC2	combined	55.35	49.045	54.001
ANAPC4	combined	52.519	52.548	51.546
ANAPC5	combined	50.565	42.882	45.482
ANAPC7	combined	-49.384	-68.177	-88.026
ANG	combined	-14.562	-30.26	-23.999
ANGEL1	combined	-36.163	-75.595	-71.652
ANGEL2	combined	-66.287	-59.87	-94.107
ANGPT1	combined	-75.292	-90.329	-97.756
ANGPT2	combined	-44.802	-91.703	-89.351
ANGPT4	combined	-63.221	-79.478	-49.517
ANGPTL1	combined	-44.649	-82.701	-78.281
ANGPTL2	combined	-41.926	-80.911	-73.205
ANGPTL3	combined	-37.069	-80.174	-81.292
ANGPTL4	combined	-55.042	-85.502	-74.015
ANGPTL5	combined	-49.686	-70.49	-73.027
ANGPTL6	combined	-56.733	-60.697	-74.877
ANGPTL7	combined	-49.177	-75.008	-85.889
ANGPTL8	combined	-51.13	-55.077	-75.262
ANHX	combined	-9.633	-78.22	-52.461
ANK1	combined	-25.523	-50.783	-54.684
ANK2	combined	-41.461	-79.451	-67.627
ANK3	combined	-51.633	-82.232	-91.53
ANKAR	combined	-52.619	-77.386	-94.432
ANKDD1A	combined	-21.008	-50.581	-33.628
ANKDD1B	combined	-39.157	-79.652	-83.581
ANKEF1	combined	-60.765	-81.933	-72.134
ANKFN1	combined	-53.098	-76.608	-76.144
ANKFY1	combined	-63.43	-76.991	-76.411
ANKH	combined	-54.519	-51.921	-67.671
ANKHD1	combined	-13.548	-33.376	-33.653
ANKIB1	combined	-40.452	-66.408	-84.586
ANKK1	combined	-51.401	-72.202	-77.19
ANKLE1	combined	-26.574	-84.634	-76.989
ANKLE2	combined	44.349	21.886	36.358
ANKMY1	combined	-51.211	-77.765	-65.545
ANKMY2	combined	-30.46	-78.595	-90.688
ANKRA2	combined	-31.19	-72.011	-57.466
ANKRD1	combined	-57.984	-86.21	-81.898
ANKRD10	combined	-66.743	-93.916	-91.059
ANKRD11	combined	-8.758	-31.693	-22.317
ANKRD12	combined	-70.665	-88.948	-88.494
ANKRD13A	combined	-62.254	-73.553	-77.597
ANKRD13B	combined	-47.955	-64.438	-55.812
ANKRD13C	combined	-31.202	-64.922	-69.394
ANKRD13D	combined	-48.484	-56.046	-76.173
ANKRD16	combined	-46.237	-65.178	-69.732
ANKRD17	combined	-11.857	-33.732	-24.587
ANKRD18A	combined	-14.507	-49.619	-57.574
ANKRD18B	combined	-4.885	-20.415	-14.728
ANKRD2	combined	-50.932	-82.715	-84.206
ANKRD22	combined	-59.29	-68.067	-42.379
ANKRD23	combined	-41.318	-57.35	-55.431
ANKRD24	combined	-46.133	-59.996	-74.377
ANKRD26	combined	-51.917	-67.529	-73.735
ANKRD27	combined	-41.49	-43.743	-66.441
ANKRD28	combined	-50.401	-74.632	-78.284
ANKRD29	combined	-64.706	-82.237	-93.415
ANKRD30A	combined	-59.068	-83.666	-82.127
ANKRD30B	combined	-73.677	-78.843	-94.424
ANKRD31	combined	-53.92	-86.979	-82.541
ANKRD33	combined	-16.506	-41.413	-47.874
ANKRD33B	combined	-53.996	-83.606	-66.561
ANKRD34A	combined	-49.199	-37.956	-56.461
ANKRD34B	combined	-46.361	-76.074	-76.357
ANKRD34C	combined	-0.705	-19.716	-17.361
ANKRD35	combined	-58.715	-66.008	-55.279
ANKRD36	combined	-1.327	-23.194	-9.348
ANKRD36B	combined	-30.997	-51.99	-57.874
ANKRD36C	combined		-15.684	-7.256
ANKRD36C	combined	10.797
ANKRD37	combined	-73.963	-74.409	-85.341
ANKRD39	combined	-52.123	-72.988	-79.427
ANKRD40	combined	-16.157	-60.164	-55.183
ANKRD42	combined	-49.635	-72.66	-66.04
ANKRD44	combined	-54.467	-83.248	-63.322
ANKRD45	combined	-60.128	-79.331	-77.535
ANKRD46	combined	-62.299	-88.661	-84.766
ANKRD49	combined	29.514	34.867	21.701
ANKRD50	combined	-51.198	-82.836	-71.853
ANKRD52	combined	-2.685	-10.895	-28.253
ANKRD53	combined	-45.621	-56.754	-43.043
ANKRD54	combined	-61.775	-69.517	-61.324
ANKRD55	combined	-33.788	-82.445	-84.473
ANKRD6	combined	-37.368	-79.301	-67.61
ANKRD60	combined	-32.036	-38.889	-36.233
ANKRD61	combined	-57.492	-91.172	-99.854
ANKRD62	combined	-46.301	-78.722	-80.325
ANKRD63	combined	-37.987	-71.706	-67.759
ANKRD65	combined	-75.766	-83.796	-86.292
ANKRD66	combined	-70.151	-78.838	-83.212
ANKRD7	combined	-66.472	-80.29	-90.479
ANKRD9	combined	-28.745	-60.475	-75.806
ANKS1A	combined	-51.504	-70.229	-77.61
ANKS1B	combined	-42.106	-74.328	-80.825
ANKS3	combined	-59.245	-80.19	-50.304
ANKS4B	combined	-50.084	-77.127	-57.722
ANKS6	combined	-29.397	-51.977	-43.519
ANKUB1	combined	-46.468	-74.132	-83.404
ANKZF1	combined	-70.267	-81.986	-77.161
ANLN	combined		-17.756	-7.439
ANLN	combined	7.152
ANO1	combined	-37.793	-77.224	-65.741
ANO10	combined	-36.788	-79.079	-82.234
ANO2	combined	-55.217	-93.887	-92.632
ANO3	combined	-53.303	-82.852	-81.217
ANO4	combined	-55.273	-82.121	-81.979
ANO5	combined	-60.132	-86.183	-83.267
ANO6	combined	-27.582	-62.93	-68.77
ANO7	combined	-72.425	-76.717	-91.004
ANO8	combined	-46.058	-72.497	-57.042
ANO9	combined	-35.844	-63.329	-71.063
ANOS1	combined	-56.061	-69.381	-96.029
ANP32A	combined	-24.343	-21.082	-47.974
ANP32B	combined	-47.757	-40.881	-49.141
ANP32D	combined	-63.782	-75.788	-64.906
ANP32E	combined	-54.724	-63.769	-41.045
ANPEP	combined	-47.151	-83.87	-94.212
ANTXR1	combined	-45.23	-83.351	-95.172
ANTXR2	combined	-55.385	-91.171	-99.096
ANTXRL	combined	-27.452	-45.514	-52.793
ANXA1	combined	-54.521	-87.208	-81.749
ANXA10	combined	-68.846	-87.365	-80.431
ANXA11	combined	-36.659	-51.987	-48.217
ANXA13	combined	-71.26	-85.016	-83.024
ANXA2	combined	-43.348	-71.796	-53.181
ANXA2R	combined	-46.08	-78.621	-62.226
ANXA3	combined	-56.647	-76.009	-87.791
ANXA4	combined	-40.89	-88.848	-64.865
ANXA5	combined	-50.174	-67.943	-66.915
ANXA6	combined	-59.073	-76.625	-53.246
ANXA7	combined	-41.944	-58.326	-41.694
ANXA8	combined	-17.974	-34.055	-33.992
ANXA8L1	combined	-19.508	-35.111	-33.627
ANXA9	combined	-42.076	-64.216	-48.975
AOAH	combined	-57.269	-62.665	-68.944
AOC1	combined	-36.411	-53.973	-61.306
AOC2	combined	-15.123	-41.951	-43.534
AOC3	combined	-25.767	-70.136	-55.972
AOX1	combined	-67.211	-94.409	-75.321
AP1AR	combined	-50.616	-71.952	-63.818
AP1B1	combined	-26.976	-58.979	-57.621
AP1G1	combined	-47.612	-62.147	-58.255
AP1G2	combined	-41.197	-57.708	-53.925
AP1M1	combined	0.124	-39.57	-28.71
AP1M2	combined	-32.615	-53.703	-80.123
AP1S1	combined	-43.569	-76.964	-71.262
AP1S2	combined	-38.435	-87.97	-69.06
AP1S3	combined	-57.334	-75.864	-73.928
AP2A1	combined	-15.249	-37.574	-30.167
AP2A2	combined	-52.73	-65.436	-86.947
AP2B1	combined	-18.662	-51.45	-41.88
AP2M1	combined	51.948	50.389	55.609
AP2S1	combined	45.175	44.667	50.967
AP3B1	combined	-24.39	-76.745	-33.236
AP3B2	combined	-18.783	-60.482	-32.024
AP3D1	combined	-34.827	-65.974	-61.305
AP3M1	combined	-37.354	-72.19	-73.24
AP3M2	combined	-56.494	-77.247	-77.842
AP3S1	combined	-20.952	-56.014	-37.737
AP4B1	combined	-51.843	-60.439	-60.533
AP4E1	combined	-67.944	-75.314	-90.316
AP4M1	combined	-51.843	-73.489	-50.776
AP4S1	combined	-44.455	-68.567	-46.237
AP5B1	combined	-29.032	-45.914	-49.233
AP5M1	combined	-60.408	-81.916	-76.818
AP5S1	combined	-60.428	-82.573	-77.143
AP5Z1	combined	-42.166	-78.621	-53.491
APAF1	combined	-62.857	-73.774	-89.485
APBA1	combined	-53.54	-83.65	-64.254
APBA2	combined	-34.614	-71.143	-66.115
APBA3	combined	-36.113	-75.765	-73.017
APBB1	combined	-53.622	-64.915	-79.968
APBB1IP	combined	-31.135	-95.043	-76.185
APBB2	combined	-42.058	-54.345	-51.263
APBB3	combined	-45.03	-82.08	-71.416
APC	combined	-54.381	-49.064	-59.082
APC2	combined	-44.952	-56.095	-47.167
APCDD1	combined	-38.562	-70.289	-67.49
APCDD1L	combined	-59.326	-77.424	-74.214
APCS	combined	-68.513	-72.73	-60.797
APEH	combined	-16.978	-48.51	-51.129
APEX1	combined	-11.911	1.167	-33.013
APEX2	combined	51.394	52.728	46.994
APH1A	combined	-44.492	-75.319	-72.902
APH1B	combined	-22.544	-43.861	-28.362
API5	combined	-21.59		-11.165
API5	combined		8.792
APIP	combined	-38.445	-62.483	-79.087
APLF	combined	-58.14	-81.733	-78.873
APLN	combined	-59.127	-80.664	-88.542
APLNR	combined	-48.816	-64.422	-73.237
APLP1	combined	-12.132	-31.05	-23.301
APLP2	combined	-74.057	-95.789	-98.729
APMAP	combined	-46.803	-60.565	-65.636
APOA1	combined	-68.712	-76.922	-93.845
APOA2	combined	-62.913	-67.077	-54.281
APOA4	combined	-47.311	-71.588	-63.984
APOA5	combined	-63.996	-79.619	-75.087
APOB	combined	-49.694	-72.725	-81.317
APOBEC1	combined	-41.243	-71.734	-62.471
APOBEC2	combined	-60.201	-68.321	-76.719
APOBEC3A	combined	-56.926	-85.98	-86.437
APOBEC3B	combined	-77.984	-84.494	-83.401
APOBEC3C	combined	-57.517	-76.715	-84.537
APOBEC3F	combined	-67.325	-67.46	-68.654
APOBEC3G	combined	-53.475	-77.956	-88.978
APOBEC3H	combined	-52.264	-76.507	-88.545
APOBEC4	combined	-43.012	-47.154	-73.321
APOBR	combined	-33.584	-38.411	-44.023
APOC1	combined	-32.68	-29.73	-56.41
APOC3	combined	-55.314	-72.362	-76.091
APOD	combined	-63.407	-89.809	-85.59
APOE	combined	-38.092	-81.34	-59.004
APOF	combined	-25.968	-73.607	-47.864
APOH	combined	-58.128	-76.571	-68.252
APOL1	combined	-33.737	-75.174	-54.316
APOL2	combined	-58.099	-90.731	-83.063
APOL3	combined	-48.518	-57.966	-66.724
APOL4	combined	-63.041	-80.31	-85.061
APOL5	combined	-65.154	-85.03	-82.881
APOL6	combined	-19.837	-59.357	-63.21
APOLD1	combined	-40.618	-73.236	-54.978
APOM	combined	-44.96	-81.384	-58.001
APOO	combined	-36.658	-81.367	-95.516
APOOL	combined	-58.296	-81.66	-87.042
APP	combined	-40.184	-79.187	-83.725
APPBP2	combined	-52.746	-76.622	-79.909
APPL1	combined	-50.454	-71.998	-55.813
APPL2	combined	-30.99	-74.583	-74.246
APRT	combined	-25.726	-37.93	-46.607
APTX	combined	-22.096	-56.905	-63.178
AQP1	combined	-36.702	-48.444	-47.792
AQP10	combined	-59.436	-68.457	-70.221
AQP11	combined	-54.891	-70.803	-46.789
AQP12A	combined	-22.554	-36.471	-33.3
AQP12B	combined	-52.799	-38.512	-59.703
AQP2	combined	-53.967	-78.512	-60.911
AQP3	combined	-51.318	-40.285	-53.493
AQP4	combined	-67.43	-91.668	-96.795
AQP5	combined	-41.279	-61.043	-59.493
AQP6	combined	-47.86	-71.818	-64.436
AQP7	combined	-4.846	-18.177	-7.517
AQP8	combined	-39.392	-71.849	-61.092
AQP9	combined	-63.141	-93.184	-73.205
AQR	combined	55.237	53.421	38.706
AR	combined	-61.017	-81.018	-96.444
ARAF	combined	-57.742	-69.075	-85.905
ARAP1	combined	-41.323	-80.059	-70.264
ARAP2	combined	-61.392	-86.463	-93.56
ARAP3	combined	-50.332	-82.472	-84.131
ARC	combined	-53.846	-79.704	-75.762
ARCN1	combined	47.73	23.648	25.204
AREG	combined	-71.244	-83.007	-77.907
AREL1	combined	-36.27	-68.999	-65.877
ARF1	combined			-4.591
ARF1	combined	20.992	20.744
ARF4	combined	-21.421		-18.602
ARF4	combined		14.187
ARF5	combined	-44.639	-68.719	-78.017
ARF6	combined	-23.801	-62.728	-29.611
ARFGAP1	combined	-42.5	-63.395	-66.567
ARFGAP2	combined	-37.361	-63.382	-63.27
ARFGAP3	combined	-71.154	-82.72	-73.335
ARFGEF1	combined	-25.969	-53.87	-55.504
ARFGEF2	combined	-45.921	-75.476	-71.613
ARFGEF3	combined	-63.394	-84.71	-90.932
ARFIP1	combined	-37.831	-68.698	-84.962
ARFIP2	combined	-43.233	-71.888	-65.1
ARFRP1	combined	38.047	41.612	42.93
ARG1	combined	-61.606	-72.906	-83.623
ARG2	combined	-52.267	-80.11	-79.556
ARGFX	combined	-54.984	-68.683	-74.182
ARGLU1	combined		4.31	-7.831
ARGLU1	combined	13.139
ARHGAP1	combined	-39.619	-37.847	-47.289
ARHGAP10	combined	-43.582	-63.675	-64.929
ARHGAP11A	combined	-22.634	-24.381	-61.734
ARHGAP11B	combined	-7.637	-58.939	-46.686
ARHGAP12	combined	-49.551	-68.334	-86.496
ARHGAP15	combined	-42.265	-72.556	-63.23
ARHGAP17	combined	-18.451	-81.835	-56.894
ARHGAP18	combined	-53.126	-72.118	-72.248
ARHGAP20	combined	-60.358	-80.098	-80.127
ARHGAP21	combined	-46.173	-67.89	-51.558
ARHGAP22	combined	-36.116	-49.576	-36.152
ARHGAP23	combined	-24.63	-47.996	-41.36
ARHGAP24	combined	-43.865	-87.554	-82.698
ARHGAP25	combined	-55.289	-79.148	-68.842
ARHGAP26	combined	-46.755	-79.57	-82.135
ARHGAP27	combined	-38.151	-76.688	-53.974
ARHGAP28	combined	-53.641	-84.337	-83.427
ARHGAP29	combined	-55.195	-58.278	-51.576
ARHGAP30	combined	-39.918	-65.066	-57.271
ARHGAP31	combined	-27.21	-81.977	-65.941
ARHGAP32	combined	-55.628	-80.673	-86.275
ARHGAP33	combined	-31.801	-52.076	-45.767
ARHGAP35	combined	-39.396	-56.753	-70.578
ARHGAP36	combined	-69.661	-97.299	-90.538
ARHGAP39	combined	-63.102	-65.952	-64.813
ARHGAP4	combined	-68.43	-81.666	-94.641
ARHGAP40	combined	-35.964	-43.155	-57.033
ARHGAP42	combined	-19.275	-21.363	-31.767
ARHGAP44	combined	-41.767	-72.006	-59.859
ARHGAP45	combined	-57.306	-58.654	-68.378
ARHGAP5	combined	-44.723	-63.983	-80.318
ARHGAP6	combined	-52.526	-69.94	-74.565
ARHGAP8	combined	-27.11	-45.511	-46.137
ARHGAP9	combined	-32.295	-65.889	-53.95
ARHGDIA	combined	-32.875	-39.095	-47.879
ARHGDIB	combined	-50.814	-85.708	-62.684
ARHGDIG	combined	-52.463	-70.199	-67.238
ARHGEF1	combined	-48.139	-80.278	-62.276
ARHGEF10	combined	-74.491	-92.689	-93.079
ARHGEF10L	combined	-43.76	-48.454	-50.025
ARHGEF11	combined	-48.817	-64.262	-64.919
ARHGEF12	combined	-46.925	-83.71	-83.737
ARHGEF15	combined	-40.059	-75.942	-65.729
ARHGEF16	combined	-60.957	-89.147	-68.381
ARHGEF17	combined	-40.844	-70.995	-60.623
ARHGEF19	combined	-32.352	-45.271	-57.86
ARHGEF2	combined	-40.194	-59.548	-57.511
ARHGEF25	combined	-22.584	-68.586	-56.576
ARHGEF26	combined	-49.691	-45.861	-68.767
ARHGEF28	combined	-41.258	-76.721	-87.766
ARHGEF3	combined	-60.616	-81.461	-77.049
ARHGEF33	combined	-25.699	-63.881	-53.328
ARHGEF35	combined	-63.821	-74.591	-79.011
ARHGEF37	combined	-49.164	-72.291	-73.561
ARHGEF38	combined	-61.404	-80.282	-75.457
ARHGEF39	combined	-54.883	-53.256	-68.55
ARHGEF4	combined	-40.365	-53.671	-61.792
ARHGEF40	combined	-29.937	-54.277	-54.41
ARHGEF5	combined	-56.264	-89.21	-90.524
ARHGEF6	combined	-66.243	-92.937	-100.872
ARHGEF7	combined	-75.442	-97.217	-94.583
ARHGEF9	combined	-56.798	-86.018	-88.208
ARID1A	combined	-36.646	-54.439	-72.738
ARID1B	combined	-48.524	-64.928	-62.03
ARID2	combined	-3.888	-33.556	-54.586
ARID3A	combined	-33.243	-51.714	-46.277
ARID3B	combined	18.425	22.332	13.015
ARID3C	combined	-6.794	-23.446	-21.183
ARID4A	combined	-65.2	-94.759	-91.512
ARID4B	combined	-25.253	-38.791	-62.588
ARID5A	combined	-34.85	-48.828	-50.597
ARID5B	combined	-41.551	-71.309	-41.269
ARIH1	combined	36.774	44.977	50.532
ARIH2	combined	-50.798	-97.236	-76.738
ARIH2OS	combined	-39.866	-72.859	-53.632
ARL1	combined	-44.296	-70.928	-53.38
ARL10	combined	-36.197	-55.278	-39.961
ARL11	combined	-56.686	-60.6	-56.319
ARL13A	combined	-77.928	-80.277	-84.834
ARL13B	combined	-36.392	-58.725	-38.372
ARL14	combined	-72.561	-77.776	-91.138
ARL14EP	combined	-50.646	-62.351	-47.023
ARL15	combined	-57.406	-74.641	-76.458
ARL16	combined	-48.928	-50.294	-49.172
ARL2BP	combined	-56.419	-56.183	-46.832
ARL3	combined	-47.02	-62.696	-70.057
ARL4A	combined		-26.639	-36.281
ARL4A	combined	10.675
ARL4C	combined	-57.404	-85.723	-91.08
ARL4D	combined	-31.503	-65.019	-52.334
ARL5A	combined	-27.095	-63.4	-74.829
ARL5B	combined	-65.982	-79.806	-76.649
ARL5C	combined	-49.474	-59.509	-63.134
ARL6	combined	-43.085	-75.543	-65.313
ARL6IP4	combined	-25.278	-62.636	-62.91
ARL6IP5	combined	-38.175	-81.604	-72.543
ARL6IP6	combined	-18.16	-51.348	-28.886
ARL8A	combined	-48.734	-70.86	-69.264
ARL8B	combined	-29.593	-58.271	-59.758
ARL9	combined	-28.536	-68.842	-52.608
ARMC1	combined	-18.567	-56.155	-71.03
ARMC10	combined	-30.395	-69.098	-42.482
ARMC12	combined	-42.659	-69.608	-59.641
ARMC2	combined	-52.048	-76.45	-69.703
ARMC3	combined	-60.516	-67.566	-77.363
ARMC4	combined	-61.816	-82.554	-72.826
ARMC5	combined	-14.02	-50.479	-21.014
ARMC6	combined	-37.284	-51.698	-63.662
ARMC7	combined	45.498	50.769	50.015
ARMC8	combined	-62.969	-71.373	-78.846
ARMC9	combined	-62.786	-90.614	-85.909
ARMCX1	combined	-68.652	-94.823	-64.845
ARMCX2	combined	-76.792	-95.745	-99.409
ARMCX3	combined	-35.791	-72.743	-70.855
ARMCX4	combined	-71.233	-87.976	-93.306
ARMCX5	combined	-65.204	-88.752	-95.734
ARMCX6	combined	-42.369	-68.767	-62.323
ARMS2	combined	-55.831	-92.76	-88.659
ARMT1	combined	-62.564	-68.156	-90.883
ARNT	combined	-31.18	-44.438	-50.182
ARNT2	combined	-59.887	-70.975	-73.725
ARNTL	combined	-48.587	-80.241	-86.519
ARNTL2	combined	-25.384	-40.183	-46.516
ARPC1A	combined	-16.122	-14.169	-32.495
ARPC1B	combined	-6.674	-28.696	-19.231
ARPC2	combined	4.023	5.815	2.168
ARPC3	combined	17.856	45.414	34.247
ARPC5	combined	-24.612	-50.618	-63.068
ARPC5L	combined	-37.134	-65.143	-61.228
ARPIN	combined	-33.607	-43.763	-48.911
ARPP19	combined	-44.145	-51.562	-58.736
ARPP21	combined	-77.021	-88.059	-91.546
ARR3	combined	-66.616	-89.697	-88.35
ARRB1	combined	-45.564	-80.87	-78.9
ARRB2	combined	-38.21	-68.077	-62.117
ARRDC1	combined	-49.574	-80.059	-70.699
ARRDC2	combined	-37.617	-66.6	-75.123
ARRDC3	combined	-56.858	-74.783	-77.152
ARRDC4	combined	-78.067	-88.852	-94.722
ARRDC5	combined	-65.908	-78.635	-68.935
ARSA	combined	-15.328	-63.646	-57.679
ARSB	combined	-31.522	-51.784	-47.814
ARSD	combined	-61.64	-80.805	-89.477
ARSE	combined	-55.942	-77.658	-80.238
ARSF	combined	-79.691	-89.839	-90.094
ARSG	combined	-53.824	-71.27	-72.19
ARSH	combined	-80.275	-77.406	-89.004
ARSI	combined	-65.301	-76.554	-74.961
ARSJ	combined	-40.44	-57.394	-67.565
ARSK	combined	-45.761	-68.437	-77.983
ART1	combined	-50.92	-61.063	-76.176
ART3	combined	-22.131	-78.157	-55.569
ART4	combined	-49.182	-74.02	-87.702
ART5	combined	-48.95	-66.913	-78.79
ARTN	combined	-23.614	-57.321	-46.934
ARV1	combined	-45.23	-76.149	-61.21
ARVCF	combined	-28.957	-46.125	-46.55
ARX	combined	-59.321	-86.875	-95.126
AS3MT	combined	-66.871	-73.74	-78.733
ASAH1	combined	-55.978	-74.052	-72.144
ASAH2	combined	-49.637	-61.815	-61.106
ASAH2B	combined	-25.324	-41.064	-34.537
ASAP1	combined	-72.758	-94.855	-95.398
ASAP2	combined	-61.852	-96.02	-92.46
ASAP3	combined	-35.254	-78.848	-62.384
ASB1	combined	-51.639	-86.707	-88.487
ASB10	combined	-64.443	-92.352	-82.992
ASB11	combined	-63.415	-76.622	-70.221
ASB12	combined	-61.516	-88.119	-82.357
ASB13	combined	-57.764	-66.025	-87.396
ASB14	combined	-35.987	-63.294	-66.673
ASB15	combined	-70.625	-89.623	-100.103
ASB16	combined	-29.852	-55.063	-25.036
ASB17	combined	-54.666	-90.064	-75.006
ASB18	combined	-69.506	-80.994	-90.238
ASB2	combined	-48.894	-81.021	-70.872
ASB3	combined	-17.797	-46.071	-36.709
ASB4	combined	-59.05	-91.776	-88.067
ASB5	combined	-67.013	-85.063	-92.965
ASB6	combined	-44.24	-67.03	-56.295
ASB7	combined	-68.125	-74.033	-63.379
ASB8	combined	-53.327	-76.231	-54.171
ASB9	combined	-68.777	-87.131	-88.266
ASCC1	combined	-48.9	-88.271	-70.71
ASCC2	combined	-68.305	-65.574	-50.73
ASCC3	combined	-5.375	1.962	-1.298
ASCL1	combined	-60.763	-82.357	-77.829
ASCL2	combined	-47.899	-86.709	-82.22
ASCL3	combined	-40.5	-62.293	-64.351
ASCL4	combined	-52.313	-83.009	-79.618
ASCL5	combined	-51.163	-81.116	-76.17
ASF1A	combined	-61.009	-85.985	-78.806
ASF1B	combined	-55.515	-86.98	-69.768
ASGR1	combined	-64.09	-75.301	-77.366
ASGR2	combined	-70.561	-84.532	-93.29
ASH1L	combined	-49.322	-54.696	-58.831
ASH2L	combined	39.365	46.475	44.07
ASIC1	combined	-35.856	-64.789	-63.783
ASIC2	combined	-44.941	-56.355	-47.903
ASIC3	combined	-49.843	-87.559	-84.528
ASIC4	combined	-56.586	-84.731	-85.011
ASIC5	combined	-76.18	-87.997	-91.23
ASIP	combined	-16.271	-34.831	-20.431
ASL	combined	-50.695	-67.895	-63.322
ASMT	combined	-71.54	-89.568	-99.022
ASMTL	combined	-65.584	-81.757	-73.027
ASNA1	combined	35.781	48.003	54.881
ASNS	combined	-47.286	-74.748	-74.329
ASNSD1	combined	-14.501	-39.389	-39.284
ASPA	combined	-64.808	-92.615	-75.039
ASPDH	combined	-54.645	-74.983	-67.755
ASPG	combined	-65.693	-81.837	-92.322
ASPH	combined	-43.311	-74.637	-62.467
ASPHD1	combined	-23.512	-89.514	-60.15
ASPHD2	combined	-33.208	-60.939	-81.894
ASPM	combined	-26.835	-48.076	-44.409
ASPN	combined	-59.719	-79.908	-81.17
ASPRV1	combined	-50.703	-56.876	-41.622
ASPSCR1	combined	-34.93	-46.155	-17.421
ASRGL1	combined	-21.749	-76.957	-66.979
ASS1	combined	-45.268	-65.963	-67.616
ASTE1	combined	-49.198	-69.267	-75.596
ASTL	combined	-43.141	-56.588	-63.075
ASTN1	combined	-47.206	-78.19	-67.719
ASTN2	combined	-48.035	-87.669	-82.727
ASXL1	combined	-26.688	-58.474	-66.35
ASXL2	combined	-33.465	-37.031	-46.624
ASXL3	combined	-65.278	-87.719	-91.297
ASZ1	combined	-35.806	-73.446	-72.652
ATAD1	combined	-40.17	-78.59	-64.676
ATAD2	combined	-42.22	-45.871	-55.619
ATAD2B	combined	-42.201	-58.527	-63.484
ATAD3A	combined	-18.745	-27.959	-27.354
ATAD3B	combined		-25.462	-29.239
ATAD3B	combined	6.996
ATAD3C	combined	-46.076	-57.72	-88.056
ATAD5	combined	32.634	14.068	13.76
ATAT1	combined	-52.836	-84.492	-90.858
ATCAY	combined	-54.979	-81.718	-70.535
ATE1	combined	-77.102	-85.999	-79.267
ATF1	combined	-27.946	-47.79	-65.502
ATF2	combined	-46.506	-81.224	-66.569
ATF3	combined	-45.536	-59.582	-66.179
ATF4	combined	-2.598	-10.664	-20.04
ATF5	combined	-48.756	-52.923	-57.15
ATF6	combined	-59.681	-67.486	-67.476
ATF6B	combined	-59.801	-67.455	-68.91
ATF7IP	combined	-65.364	-79.323	-85.736
ATF7IP2	combined	-50.071	-77.681	-86.877
ATG10	combined	-34.83	-77.148	-62.928
ATG101	combined		-39.426	-20.778
ATG101	combined	10.857
ATG12	combined	-27.853	-40.504	-44.335
ATG13	combined	-32.848	-44.359	-4.015
ATG14	combined	-28.367	-36.61	-44.283
ATG16L1	combined	-71.195	-91.839	-90.143
ATG16L2	combined	-54.765	-69.191	-53.735
ATG2A	combined	-47.067	-68.011	-50.971
ATG2B	combined	-53.644	-77.693	-96.12
ATG3	combined	-53.46	-71.237	-52.668
ATG4A	combined	-59.968	-91.389	-86.601
ATG4B	combined	-73.824	-85.802	-93.232
ATG4C	combined	-16.059	-50.94	-63.997
ATG4D	combined	-26.484	-34.011	-42.847
ATG5	combined	-40.464	-79.809	-62.282
ATG7	combined	-21.509	-60.993	-62.553
ATG9A	combined	-4.154	-9.081
ATG9A	combined			12.528
ATG9B	combined	-40.267	-72.958	-73.965
ATIC	combined	46.097	48.683	45.35
ATL1	combined	-26.263	-40.808	-40.784
ATL2	combined	43.688	44.151	41.6
ATL3	combined	-34.957	-62.816	-58.697
ATM	combined	27.165	18.326	28.01
ATMIN	combined	-23.176	-72.7	-47.754
ATN1	combined	-29.441	-51.023	-46.079
ATOH1	combined	-50.742	-77.727	-70.664
ATOH7	combined	-37.309	-59.361	-61.944
ATOH8	combined	-40.389	-70.359	-68.191
ATOX1	combined	-61.263	-87.149	-91.512
ATP10A	combined	-50.11	-72.056	-91.212
ATP10B	combined	-37.041	-46.524	-44.332
ATP10D	combined	-52.94	-79.392	-72.688
ATP11A	combined	-62.062	-83.799	-94.79
ATP11B	combined	-46.494	-65.891	-80.67
ATP11C	combined	-37.221	-83.782	-76.885
ATP12A	combined	-52.854	-63.868	-66.444
ATP13A1	combined	-6.366	-12.322	3.128
ATP13A2	combined	-59.084	-97.605	-87.299
ATP13A3	combined	-66.557	-82.463	-86.115
ATP13A4	combined	-62.316	-81.24	-83.319
ATP13A5	combined	-72.282	-89.91	-93.401
ATP1A1	combined	39.852	22.661	17.358
ATP1A2	combined	-63.39	-35.851	-41.117
ATP1A3	combined	-24.775	-70.574	-53.211
ATP1A4	combined	-67.691	-86.046	-74.173
ATP1B1	combined	-60.551	-74.02	-80.315
ATP1B2	combined	-33.039	-77.763	-76.285
ATP1B3	combined	-39.065	-60.555	-66.838
ATP1B4	combined	-63.061	-87.206	-91.253
ATP23	combined	-16.566	-47.267	-59.597
ATP2A1	combined	-40.597	-67.835	-61.341
ATP2A2	combined	56.496	52.611	57.001
ATP2A3	combined	-52.198	-49.987	-52.247
ATP2B1	combined	-62.096	-73.107	-59.655
ATP2B2	combined	-64.994	-78.903	-70.5
ATP2B3	combined	-60.734	-76.827	-86.162
ATP2B4	combined	-49.462	-69.934	-83.114
ATP2C1	combined	-48.243	-85.922	-49.764
ATP2C2	combined	-70.069	-69.813	-73.821
ATP4A	combined	-33.261	-58.15	-58.56
ATP4B	combined	-52.047	-90.473	-80.067
ATP5A1	combined	53.349	53.336	50.794
ATP5B	combined	43.855	47.124	51.961
ATP5C1	combined	40.518	29.238	24.388
ATP5D	combined	46.432	42.729	45.118
ATP5E	combined	18.293	19.684	28.689
ATP5F1	combined	23.113	27.039	29.593
ATP5G1	combined	-24.366	-51.748	-56.396
ATP5G2	combined	-39.519	-42.96	-44.113
ATP5G3	combined	-56.684	-82.304	-80.495
ATP5H	combined	33.387	28.262	30.691
ATP5I	combined	-6.514	-15.211	-5.324
ATP5J	combined	20.034	18.042	21.827
ATP5J2	combined	25.349	19.319	16.536
ATP5J2-PTCD1	combined	-1.985	-8.068	-5.384
ATP5L	combined	13.756	20.052	16.973
ATP5L2	combined	-25.509	-48.274	-30.331
ATP5S	combined	-31.228	-60.145	-54.517
ATP5SL	combined	-44.215	-56.501	-53.229
ATP6AP1	combined			-9.615
ATP6AP1	combined	25.289	19.141
ATP6AP1L	combined	-54.309	-75.759	-59.42
ATP6AP2	combined	35.582	50.38	47.574
ATP6V0A1	combined	-34.672	-53.162	-36.237
ATP6V0A2	combined	-46.468	-65.771	-65.236
ATP6V0A4	combined	-24.076	-60.861	-65.841
ATP6V0B	combined	56.614	47.448	46.736
ATP6V0C	combined	31.39	26.753	28.833
ATP6V0D1	combined	43.976	45.127	49.267
ATP6V0D2	combined	-17.439	-78.499	-75.046
ATP6V0E1	combined	-59.689	-89.162	-90.996
ATP6V0E2	combined	-64.033	-79.642	-64.92
ATP6V1A	combined	51.496	53.018	54.427
ATP6V1B1	combined	-43.857	-63.959	-53.872
ATP6V1B2	combined	46.373	48.95	46.94
ATP6V1C1	combined	35.284	31.354	39.039
ATP6V1C2	combined	-65.547	-58.823	-93.118
ATP6V1D	combined	50.099	45.046	41.011
ATP6V1E1	combined	42.627	46.686	47.307
ATP6V1E2	combined	-55.86	-81.031	-62.497
ATP6V1F	combined	22.596	25.159	25.332
ATP6V1G1	combined	27.555	32.291	29.58
ATP6V1G2	combined	-21.694	-71.517	-76.63
ATP6V1G3	combined	-69.131	-72.506	-73.214
ATP6V1H	combined	0.735
ATP6V1H	combined		20.602	8.861
ATP7A	combined	-62.509	-87.142	-81.978
ATP7B	combined	-72.634	-80.847	-84.108
ATP8A1	combined	-45.145	-77.745	-78.322
ATP8A2	combined	-42.699	-71.914	-71.577
ATP8B1	combined	-73.925	-85.284	-83.197
ATP8B2	combined	-47.541	-68.218	-68.368
ATP8B3	combined	-31.221	-58.146	-62.56
ATP8B4	combined	-54.84	-80.171	-82.151
ATP9A	combined	-49.665	-63.105	-75.59
ATP9B	combined	-50.001	-77.607	-87.183
ATPAF1	combined	-27.271	-68.177	-84.591
ATPAF2	combined	3.196	-12.585	0.394
ATPIF1	combined	-33.339	-57.827	-76.822
ATR	combined	44.162	51.9	56.641
ATRAID	combined	-53.219	-75.649	-88.74
ATRIP	combined	18.112	26.052	25.035
ATRN	combined	-43.434	-42.19	-58.431
ATRNL1	combined	-58.434	-64.1	-61.633
ATRX	combined	-44.755	-35.444	-34.94
ATXN1	combined	-56.933	-72.46	-62.428
ATXN10	combined	22.973	20.64	28.317
ATXN1L	combined	-51.882	-77.488	-73.766
ATXN2	combined	-30.263	-55.412	-69.296
ATXN2L	combined	-11.378	-1.98
ATXN2L	combined			8.849
ATXN3	combined	-65.419	-87.056	-94.324
ATXN3L	combined	-67.9	-96.058	-83.078
ATXN7	combined	-34.345	-65.849	-71.895
ATXN7L1	combined	-58.037	-66.842	-58.445
ATXN7L2	combined	-25.22	-60.014	-37.957
ATXN7L3	combined	51.022	43.798	39.932
ATXN7L3B	combined	-26.194	-46.441	-46.67
AUH	combined	-49.618	-59.133	-56.455
AUNIP	combined	-49.54	-56.762	-64.974
AUP1	combined	-42.545	-48.92	-46.356
AURKA	combined	35.628	31.888	42.133
AURKAIP1	combined	20.212	18.988	19.381
AURKB	combined	30.591	39.988	48.041
AURKC	combined	-68.189	-80.843	-90.175
AUTS2	combined	-56.866	-82.762	-59.72
AVEN	combined	-24.161	-41.85	-61.339
AVIL	combined	-15.39	-63.512	-63.711
AVL9	combined	-52.894	-54.344	-79.397
AVP	combined	-52.143	-73.512	-73.739
AVPI1	combined	-50.965	-72.461	-80.062
AVPR1A	combined	-38.393	-74.07	-68.358
AVPR1B	combined	-50.279	-55.456	-56.937
AVPR2	combined	-58.894	-68.053	-85.437
AWAT1	combined	-52.161	-76.313	-93.774
AWAT2	combined	-57.381	-74.965	-76.735
AXDND1	combined	-40.496	-43.381	-66.768
AXIN1	combined	-37.442	-80.443	-71.917
AXIN2	combined	-53.479	-61.668	-69.749
AXL	combined	-57.838	-87.135	-92.9
AZGP1	combined	-52.693	-80.502	-85.434
AZI2	combined	-50.366	-65.39	-89.19
AZIN1	combined	-9.525		-17.224
AZIN1	combined		28.992
AZIN2	combined	-30.835	-65.745	-60.676
AZU1	combined	-65.112	-83.943	-85.982
B2M	combined	-57.062	-72.267	-80.64
B3GALNT1	combined	-59.169	-83.055	-84.912
B3GALNT2	combined	-40.888	-60.444	-78.843
B3GALT1	combined	-56.413	-94.701	-81.493
B3GALT2	combined	-45.97	-54.254	-79.402
B3GALT4	combined	-27.85	-64.253	-63.119
B3GALT5	combined	-46.25	-82.739	-90.765
B3GALT6	combined	-58.699	-72.606	-58.424
B3GAT1	combined	-71.042	-89.489	-91.421
B3GAT2	combined	-27.466	-63.19	-73.728
B3GAT3	combined	-19.301	-25.93	-10.25
B3GLCT	combined	-22.271	-41.735	-40.542
B3GNT2	combined	-64.709	-67.595	-44.861
B3GNT3	combined	-38.951	-78.581	-56.161
B3GNT4	combined	-15.439	-42.438	-16.12
B3GNT5	combined	-60.575	-75.418	-91.704
B3GNT6	combined	-31.296	-76.3	-45.551
B3GNT7	combined	-60.215	-86.134	-84.008
B3GNT8	combined	-43.466	-69.014	-76.927
B3GNT9	combined	-54.564	-53.848	-65.982
B3GNTL1	combined	-41.516	-61.498	-49.088
B4GALNT1	combined	-37.009	-49.534	-61.951
B4GALNT2	combined	-37.247	-55.731	-54.17
B4GALNT3	combined	-48.146	-66.223	-53.472
B4GALNT4	combined	-62.571	-76.547	-79.552
B4GALT1	combined	-49.594	-85.133	-80.767
B4GALT2	combined	-38.16	-53.126	-42.798
B4GALT3	combined	-34.258	-44.123	-36.357
B4GALT4	combined	-28.018	-61.581	-47.775
B4GALT5	combined	-47.102	-56.627	-67.417
B4GALT6	combined	-39.158	-72.166	-78.048
B4GALT7	combined	-54.709	-42.745	-64.819
B4GAT1	combined	-9.812	-45.81	-75.346
B9D1	combined	-43.295	-78.584	-68.744
B9D2	combined	-55.295	-89.125	-81.166
BAALC	combined	-52.02	-65.696	-68.436
BAAT	combined	-56.83	-74.743	-45.879
BABAM1	combined	-14.674	-5.648	-7.701
BACE1	combined	-44.635	-74.685	-66.516
BACE2	combined	-66.563	-78.108	-78.171
BACH1	combined	-47.25	-55.894	-59.855
BACH2	combined	-52.492	-67.752	-50.008
BAD	combined	-25.125	-52.928	-54.419
BAG1	combined	-12.375	-34.654	-43.925
BAG2	combined	-15.411	-51.871	-60.823
BAG3	combined	-45.865	-64.906	-64.664
BAG4	combined	-38.996	-61.826	-55.835
BAG5	combined	-63.078	-75.742	-91.541
BAG6	combined	-23.554	-22.368	-6.82
BAHCC1	combined	-49.988	-51.815	-62.84
BAHD1	combined	-22.87	-74.154	-51.4
BAIAP2	combined	-21.658	-69.356	-56.177
BAIAP2L1	combined	-26.277	-52.105	-71.928
BAIAP2L2	combined	-37.371	-76.816	-68.934
BAIAP3	combined	-42.226	-59.748	-45.325
BAK1	combined	-33.555	-60.494	-41.285
BAMBI	combined	-57.34	-86.175	-90.083
BANF1	combined	58.071	52.686	57.029
BANF2	combined	-45.794	-61.234	-53.782
BANK1	combined	-53.282	-81.669	-71.718
BANP	combined	2.98	-15.911	4.242
BAP1	combined	18.895	39.97	27.504
BARD1	combined			5.819
BARD1	combined	17.162	13.48
BARHL1	combined	-43.938	-76.504	-75.875
BARHL2	combined	-53.342	-59.281	-81.128
BARX1	combined	-40.498	-61.537	-56.835
BARX2	combined	-71.132	-89.961	-92.195
BASP1	combined	-46.675	-72.296	-86.309
BATF	combined	-52.215	-90.073	-85.415
BATF2	combined	-57.02	-67.113	-40.415
BATF3	combined	-45.898	-66.431	-83.806
BAX	combined	-50.65	-80.383	-75.102
BAZ1A	combined	-50.385	-61.276	-39.508
BAZ1B	combined		-30.767	-17.861
BAZ1B	combined	6.374
BAZ2A	combined	-5.015	-15.144	-15.669
BAZ2B	combined	-60.459	-87.313	-68.148
BBC3	combined	-62.247	-63.755	-79.312
BBIP1	combined	-59.881	-93.305	-72.274
BBOF1	combined	-59.413	-61.565	-78.92
BBOX1	combined	-70.631	-64.765	-79.199
BBS1	combined	-19.459	-40.152	-39.739
BBS10	combined	-34.97	-67.361	-52.023
BBS12	combined	-76.87	-86.474	-89.186
BBS2	combined	-58.703	-73.506	-80.366
BBS4	combined	-43.017	-57.24	-53.261
BBS7	combined	-47.082	-75.065	-72.781
BBS9	combined	-41.494	-83.056	-73.843
BBX	combined	-65.969	-79.006	-85.756
BCAM	combined	-34.192	-52.122	-59.824
BCAN	combined	-33.366	-63.81	-60.706
BCAP29	combined	-64.363	-83.838	-77.645
BCAP31	combined	-46.793	-75.991	-69.339
BCAR1	combined	-40.77	-36.183	-48.746
BCAR3	combined	-35.909	-71.408	-58.417
BCAS1	combined	-60.497	-94.727	-77.219
BCAS2	combined	33.638	27.683	46.854
BCAS3	combined	-49.955	-68.342	-84.514
BCAS4	combined	-52.387	-66.988	-72.475
BCAT1	combined	-10.033	-49.09	-27.143
BCAT2	combined	-66.141	-80.781	-82.051
BCCIP	combined	48.86	37.713	49.209
BCDIN3D	combined	-45.728	-68.241	-59.007
BCHE	combined	-68.154	-87.386	-86.066
BCKDHA	combined	-24.01	-36.93	-34.141
BCKDHB	combined	-26.034	-61.421	-60.947
BCKDK	combined	-38.386	-65.825	-69.924
BCL10	combined	-33.651	-81.254	-63.177
BCL11A	combined	-53.592	-88.92	-79.123
BCL11B	combined	-51.006	-63.575	-65.705
BCL2	combined	-50.961	-89.178	-81.667
BCL2A1	combined	-30.348	-73.281	-42.731
BCL2L1	combined	-2.382	-27.764
BCL2L1	combined			19.122
BCL2L10	combined	-43.68	-74.166	-68.619
BCL2L11	combined	-49.864	-75.638	-80.262
BCL2L12	combined	-25.064	-85.497	-77.735
BCL2L13	combined	-39.463	-77.422	-81.716
BCL2L14	combined	-48.615	-64.856	-71.368
BCL2L15	combined	-43.111	-67.541	-57.602
BCL2L2	combined	3.552	-23.659	-17.335
BCL3	combined	-69.236	-69.549	-74.553
BCL6	combined	-64.557	-58.495	-66.953
BCL6B	combined	-50.682	-73.621	-67.426
BCL7A	combined	-54.097	-86.011	-76.744
BCL7B	combined	-62.177	-78.094	-88.375
BCL7C	combined	-17.651	-59.692	-41.652
BCL9	combined	-51.21	-76.907	-53.564
BCL9L	combined	-19.305	-42.364	-49.118
BCLAF1	combined	12.32	34.114	19.237
BCO1	combined	-36.131	-62.995	-48.346
BCO2	combined	-73.196	-59.025	-90.403
BCOR	combined	-58.677	-79.634	-85.194
BCORL1	combined	-62.887	-80.663	-94.36
BCR	combined	-40.877	-52.701	-48.087
BCS1L	combined	45.244	52.63	57.239
BDH1	combined	-48.36	-64.157	-59.35
BDH2	combined	-42.654	-66.574	-52.278
BDKRB1	combined	-72.295	-76.669	-91.502
BDNF	combined	-37.26	-76.436	-56.471
BDP1	combined	11.213	20.908	18.134
BEAN1	combined	-41.288	-71.262	-64.44
BECN1	combined	1.464	-1.959	3.426
BEGAIN	combined	-76.099	-76.276	-92.669
BEND2	combined	-81.296	-101.332	-102.315
BEND3	combined	-28.751	-10.632	-36.103
BEND4	combined	-41.443	-60.123	-64.847
BEND5	combined	-57.552	-87.17	-83.989
BEND6	combined	-56.98	-67.121	-59.688
BEND7	combined	-56.116	-73.723	-77.903
BEST1	combined	-61.037	-84.185	-60.705
BEST2	combined	-24.581	-54.431	-52.563
BEST3	combined	-51.732	-79.813	-70.524
BEST4	combined	-25.191	-75.827	-63.928
BET1	combined	0.859	1.016	-21.29
BET1L	combined	-58.28	-79.867	-95.52
BEX1	combined	-61.483	-80.945	-85.388
BEX2	combined	-64.356	-82.342	-95.019
BEX3	combined	-51.662	-79.596	-73.943
BEX4	combined	-66.887	-72.423	-74.885
BEX5	combined	-53.861	-85.777	-77.211
BFAR	combined	-55.702	-77.014	-87.299
BFSP1	combined	-65.897	-80.471	-80.862
BFSP2	combined	-70.227	-89.627	-93.01
BGLAP	combined	-53.007	-69.216	-60.325
BGN	combined	-53.01	-75.254	-95.855
BHLHA15	combined	-29.974	-47.751	-37.557
BHLHA9	combined	-68.896	-82.586	-66.575
BHLHB9	combined	-49.601	-78.4	-92.192
BHLHE22	combined	-40.047	-93.308	-85.787
BHLHE23	combined	-61.769	-78.39	-73.149
BHLHE40	combined	-37.793	-84.446	-72.58
BHLHE41	combined	-62.655	-77.573	-86.155
BHMT	combined	-44.994	-69.804	-67.946
BHMT2	combined	-48.582	-83.583	-82.85
BICC1	combined	-34.195	-69.225	-64.184
BICD1	combined	-30.882	-65.962	-68.615
BICD2	combined	-46.816	-57.179	-69.947
BICDL1	combined	-38.389	-65.233	-82.023
BICDL2	combined	-15.789	-46.282	-44.319
BID	combined	-0.46	-24.825	-24.303
BIK	combined	-51.414	-79.405	-89.466
BIN1	combined	-48.987	-70.452	-66.135
BIN2	combined	-57.804	-79.708	-67.525
BIN3	combined	-49.51	-67.095	-71.344
BIRC2	combined	-65.341	-72.552	-69.584
BIRC3	combined	-52.134	-72.96	-78.139
BIRC5	combined	55.761	49.586	56.342
BIRC6	combined	-51.455	-78.074	-68.109
BIRC7	combined	-44.059	-84.506	-72.274
BIRC8	combined	-58.507	-68.116	-91.849
BIVM	combined	-25.471	-39.062	-48.708
BLACE	combined	-33.962	-35.979	-42.371
BLCAP	combined	-51.214	-62.491	-60.802
BLID	combined	-69.235	-85.042	-95.837
BLK	combined	-47.639	-83.019	-77.168
BLM	combined	10.998	21.054	14.921
BLMH	combined	-57.524	-77.288	-37.691
BLNK	combined	-48.55	-66.366	-93.117
BLOC1S1	combined	-4.416	-34.878	-35.162
BLOC1S2	combined	-50.093	-70.837	-77.746
BLOC1S3	combined	-48.796	-71.223	-80.55
BLOC1S4	combined	-44.52	-75.302	-84.881
BLOC1S5	combined	-22.795	-43.487	-41.75
BLOC1S6	combined	-15.24	-41.629	-37.082
BLVRA	combined	-58.341	-85.505	-63.916
BLVRB	combined	-40.798	-83.329	-60.798
BLZF1	combined	-36.939	-71.511	-77.868
BMF	combined	-29.442	-56.662	-63.532
BMP1	combined	-47.574	-60.641	-63.177
BMP10	combined	-54.935	-77.262	-73.953
BMP15	combined	-65.394	-89.513	-87.852
BMP2	combined	-60.294	-60.25	-78.873
BMP2K	combined	-44.768	-76.003	-78.023
BMP3	combined	-64.717	-90.27	-87.467
BMP4	combined	-58.106	-79.332	-83.078
BMP5	combined	-72.015	-77.103	-83.779
BMP6	combined	-62.683	-72.364	-90.938
BMP7	combined	-50.698	-88.832	-78.591
BMP8A	combined	-39.147	-77.387	-73.528
BMP8B	combined	-35.134	-75.918	-68.413
BMPER	combined	-64.844	-88.129	-93.026
BMPR1A	combined	-29.545	-12.645	-45.638
BMPR1B	combined	-59.055	-63.071	-60.317
BMPR2	combined	-60.937	-86.342	-92.618
BMS1	combined	24.583	33.747	28.706
BMT2	combined	-46.944	-87.941	-51.656
BMX	combined	-73.028	-80.355	-87.306
BNC1	combined	-22.541	-39.636	-34.992
BNC2	combined	-65.934	-71.628	-83.042
BNIP1	combined	35.531	16.376	8.353
BNIP2	combined	-51.715	-63.477	-79.057
BNIP3	combined	-33.391	-50.6	-27.129
BNIP3L	combined	-68.35	-88.647	-95.153
BNIPL	combined	-47.648	-75.899	-68.306
BOC	combined	-34.537	-75.154	-80.511
BOD1	combined	-52.064	-85.853	-92.866
BOD1L1	combined	-10.333	-26.737	-36.799
BOD1L2	combined	-84.279	-90.83	-100.05
BOK	combined	-59.073	-91.152	-89.06
BOLA1	combined	-41.097	-57.027	-42.125
BOLA2B	combined			0.196
BOLA2B	combined	20.69	9.392
BOLA3	combined	-6.663	-38.525	-29.991
BOLL	combined	-26.094	-38.691	-30.484
BOP1	combined	38.471	21.811	26.443
BORA	combined	-0.535	5.01	-4.16
BORCS5	combined	-50.536	-72.119	-70.032
BORCS6	combined	-30.727	-43.38	-49.997
BORCS7	combined	-13.251	-29.515	-23.641
BPGM	combined	-66.926	-85.493	-77.528
BPHL	combined	-62.522	-82.791	-89.252
BPI	combined	-46.567	-58.879	-47.09
BPIFA1	combined	-40.467	-71.463	-66.211
BPIFA2	combined	-33.559	-51.727	-42.509
BPIFA3	combined	-47.503	-64.579	-49.193
BPIFB1	combined	-42.951	-84.226	-53.128
BPIFB2	combined	-30.354	-61.192	-61.634
BPIFB3	combined	-30.147	-63.637	-57.619
BPIFB4	combined	-36.436	-57.545	-75.204
BPIFB6	combined	-44.632	-76.197	-67.316
BPIFC	combined	-55.593	-82.932	-80.782
BPNT1	combined	-55.823	-83.857	-89.702
BPTF	combined	21.905	12.079	8.138
BPY2B	combined	-37.109	-44.599	-51.459
BRAF	combined	-73.531	-88.241	-79.928
BRAP	combined	-53.645	-58.035	-70.103
BRAT1	combined	19.554	34.364	46.237
BRCA1	combined	42.261	35.108	47.756
BRCA2	combined	10.49	43.159	38.061
BRCC3	combined	-36.85	-54.374	-50.219
BRD1	combined	-29.74
BRD1	combined		29.022	15.146
BRD2	combined	-8.397	-4.05	-16.755
BRD3	combined	-42.154	-45.536	-56.07
BRD4	combined	14.521	26.046	35.282
BRD7	combined	-14.678	-55.376	-54.283
BRD8	combined	6.165	14.041	6.331
BRD9	combined	-44.299	-84.114	-80.058
BRDT	combined	-67.654	-68.968	-58.417
BRF1	combined	46.847	51.739	55.181
BRF2	combined	55.998	49.01	46.924
BRI3	combined	-49.774	-80.65	-78.199
BRI3BP	combined	-28.128	-65.223	-74.271
BRICD5	combined	-38.672	-61.039	-65.638
BRINP1	combined	-54.99	-72.103	-75.588
BRINP2	combined	-67.399	-65.776	-79.402
BRINP3	combined	-57.515	-79.8	-79.905
BRIP1	combined	34.045	8.21	34.935
BRIX1	combined	34.954	46.39	49.658
BRK1	combined	-20.354	-24.04	-28.812
BRMS1	combined	-8.617	-38.119	-24.89
BRMS1L	combined	-52.673	-81.393	-71.234
BROX	combined	-62.448	-85.863	-78.272
BRPF1	combined	-43.306	-63.476	-52.536
BRPF3	combined	-51.931	-69.392	-69.483
BRS3	combined	-78.283	-84.092	-95.284
BRSK1	combined	-49.291	-64.582	-81.105
BRSK2	combined	-57.807	-69.954	-72.631
BRWD1	combined	-56.212	-81.885	-74.364
BRWD3	combined	-64.807	-80.644	-76.961
BSCL2	combined	2.469	-54.31	-53.974
BSDC1	combined	-35.808	-47.06	-51.338
BSG	combined	0.844	-29.45
BSG	combined			13.613
BSN	combined	-51.688	-90.668	-72.105
BSND	combined	-44.233	-70.841	-54.611
BSPH1	combined	-53.209	-79.692	-68.914
BSPRY	combined	-57.646	-86.532	-76.482
BST1	combined	-49.252	-84.461	-79.999
BST2	combined	-30.934	-79.771	-75.999
BSX	combined	-77.364	-89.379	-94.991
BTAF1	combined		-21.492	4.838
BTAF1	combined	12.622
BTBD1	combined	-24.074	-75.245	-54.714
BTBD10	combined	-67.189	-90.248	-93.017
BTBD11	combined	-57.226	-81.017	-82.233
BTBD16	combined	-61.689	-84.453	-91.931
BTBD17	combined	-63.816	-88.399	-75.293
BTBD18	combined	-15.114	-48.209	-24.115
BTBD19	combined	-46.141	-69.539	-60.365
BTBD2	combined	-57.743	-88.514	-79.313
BTBD3	combined	-68.352	-83.48	-92.643
BTBD6	combined	-60.288	-84.363	-97.188
BTBD7	combined	-62.921	-75.918	-84.937
BTBD9	combined	-32.459	-42.468	-62.028
BTC	combined	-62.547	-75.248	-80.507
BTD	combined	-56.722	-73.718	-79.542
BTF3	combined			5.005
BTF3	combined	13.162	11.188
BTF3L4	combined	-9.542	-18.397	4.207
BTG1	combined	-67.805	-79.435	-77.309
BTG2	combined	-43.529	-86.727	-70.196
BTG3	combined	-21.825	-74.483	-60.259
BTG4	combined	-65.105	-94.334	-88.664
BTK	combined	-50.2	-66.714	-66.039
BTLA	combined	-71.308	-94.229	-92.335
BTN1A1	combined	-50.105	-49.358	-82.611
BTN2A1	combined	-61.126	-75.225	-85.365
BTN2A2	combined	-29.635	-63.337	-52.698
BTN3A1	combined	-46.877	-69.938	-68.653
BTN3A2	combined	-56.953	-78.925	-79.875
BTN3A3	combined	-34.113	-53.002	-71.799
BTNL2	combined	-45.766	-63.457	-73.474
BTNL3	combined	-68.946	-75.396	-77.798
BTNL8	combined	-41.924	-79.584	-67.726
BTNL9	combined	-64.604	-88.348	-82.135
BTRC	combined	-48.781	-58.753	-71.264
BUB1	combined		4.762	2.625
BUB1	combined	20.15
BUB1B	combined	5.605	-29.835	-1.48
BUB3	combined	48.473	48.198	53.048
BUD13	combined	29.021	6.446	13.841
BUD31	combined	54.83	49.549	56.624
BVES	combined	-18.763	-78.051	-71.64
BYSL	combined	38.206	42.66	33.858
BZW1	combined	-31.918	-52.924	-68.504
BZW2	combined	-61.998	-72.586	-77.899
C10orf10	combined	-49.819	-73.881	-63.833
C10orf105	combined	-43.201	-63.933	-52.541
C10orf107	combined	-52.99	-69.296	-63.283
C10orf113	combined	-58.023	-79.889	-101.197
C10orf120	combined	-52.733	-73.909	-95.781
C10orf128	combined	-6.233	-60.605	-46.129
C10orf142	combined	-13.269	-29.122	-33.182
C10orf35	combined	-38.079	-76.146	-64.629
C10orf53	combined	-48.343	-55.897	-79.434
C10orf55	combined	-22.549	-48.054	-33.201
C10orf62	combined	-40.217	-71.537	-67.196
C10orf67	combined	-61.481	-80.943	-55.953
C10orf71	combined	-52.888	-70.585	-82.322
C10orf76	combined	-35.332	-3.004	-38.337
C10orf82	combined	-64.527	-91.94	-86.522
C10orf88	combined	-45.728	-66.22	-65.344
C10orf90	combined	-64.98	-77.837	-88.422
C10orf95	combined	-17.356	-38.945	-19.648
C10orf99	combined	-64.718	-74.674	-89.572
C11orf1	combined	-48.615	-77.115	-69.279
C11orf16	combined	-60.16	-67.408	-75.17
C11orf21	combined	-42.187	-61.911	-73.35
C11orf24	combined	-13.601	-75.773	-65.087
C11orf40	combined	-68.128	-79.298	-81.961
C11orf42	combined	-58.082	-73.143	-79.698
C11orf45	combined	-73.153	-95.468	-92.783
C11orf49	combined	-38.297	-53.441	-36.657
C11orf52	combined	-70.416	-82.53	-76.141
C11orf53	combined	-51.634	-69.744	-83.019
C11orf54	combined	-39.166	-36.979	-46.644
C11orf57	combined	-4.987		-11.133
C11orf57	combined		14.747
C11orf58	combined	-32.288	-76.843	-87.308
C11orf63	combined	-64.736	-82.488	-76.76
C11orf65	combined	-59.701	-73.301	-69.464
C11orf68	combined	-40.482	-82.519	-67.387
C11orf70	combined	-52.064	-81.009	-73.371
C11orf71	combined	-52.391	-87.744	-101.505
C11orf74	combined	-51.446	-79.529	-65.452
C11orf80	combined	-42.246	-74.9	-84.406
C11orf84	combined	-30.751	-51.06	-41.084
C11orf86	combined	-25.642	-53.69	-51.799
C11orf87	combined	-64.157	-91.369	-81.363
C11orf88	combined	-59.077	-72.641	-94.616
C11orf91	combined	-34.277	-59.616	-52.791
C11orf94	combined	-25.143	-49.387	-44.719
C11orf95	combined	-2	-21.878	-15.806
C11orf96	combined	-64.659	-75.984	-45.873
C12orf10	combined	-56.128	-85.127	-69.011
C12orf29	combined	-51.324	-72.292	-76.785
C12orf4	combined	-35.979	-56.516	-82.51
C12orf40	combined	-35.302	-72.565	-69.284
C12orf42	combined	-46.794	-65.639	-84.49
C12orf43	combined	-40.367	-55.933	-53.484
C12orf45	combined	21.701	23.065	27.429
C12orf49	combined	-21.701	-92.052	-77.586
C12orf50	combined	-23.231	-60.481	-61.872
C12orf54	combined	-8.851	-37.367	-28.391
C12orf56	combined	-36.547	-36.468	-43.832
C12orf57	combined	-51.822	-68.104	-62.263
C12orf60	combined	-61.126	-80.857	-91.024
C12orf65	combined	-27.957	-53.387	-31.483
C12orf66	combined	-70.729	-100.389	-82.486
C12orf71	combined	-57.675	-68.738	-63.98
C12orf73	combined	-28.157	-73.408	-80.707
C12orf75	combined	-49.299	-73.654	-78.977
C12orf76	combined	-41.909	-69.26	-72.687
C14orf1	combined	-45.81	-78.295	-76.429
C14orf105	combined	-21.734	-55.183	-64.117
C14orf119	combined	-2.69	-33.492	-48.167
C14orf132	combined	-55.278	-75.269	-77.653
C14orf159	combined	-70.259	-70.929	-76.855
C14orf166	combined	-2.652
C14orf166	combined		35.057	6.131
C14orf177	combined	-52.637	-63.904	-80.271
C14orf178	combined	-9.733	-46.089	-42.596
C14orf180	combined	-63.932	-75.087	-87.793
C14orf2	combined	-44.802	-44.805	-18.233
C14orf28	combined	-11.273	-41.488	-23.244
C14orf37	combined	-27.579	-74.766	-87.373
C14orf39	combined	-46.089	-51.896	-68.015
C14orf79	combined	-71.748	-82.689	-96.455
C14orf80	combined	59.596	39.397	47.82
C14orf93	combined	-40.595	-62.755	-63.113
C15orf39	combined	-21.771	-38.501	-16.838
C15orf40	combined	-27.412	-44.508	-23.062
C15orf41	combined	49.377	41.193	46.738
C15orf48	combined	-15.642	-26.294	-20.395
C15orf52	combined	-30.658	-63.033	-54.887
C15orf53	combined	-49.059	-66.889	-64.071
C15orf57	combined	15.56	35.465	23.151
C15orf59	combined	-33.327	-68.316	-52.752
C15orf61	combined	-44.622	-55.586	-55.344
C15orf62	combined	-40.146	-54.758	-52.538
C15orf65	combined	-66.279	-76.12	-79.292
C16orf45	combined	-42.96	-72.296	-80.654
C16orf46	combined	-55.434	-82.072	-60.59
C16orf52	combined	-26.943	-61.723	-52.709
C16orf54	combined	-45.28	-80.949	-61.756
C16orf58	combined	-31.006	-77.281	-69.216
C16orf59	combined	25.102	39.869	27.011
C16orf62	combined	-14.18	-46.115	-48.906
C16orf70	combined	-52.848	-70.247	-45.553
C16orf71	combined	-50.908	-59.588	-78.871
C16orf72	combined	-33.118	-54.001	-30.821
C16orf74	combined	-69.262	-89.205	-84.009
C16orf78	combined	-61.266	-75.755	-67.571
C16orf86	combined	-41.353	-49.805	-56.243
C16orf87	combined	-58.567	-80.296	-84.002
C16orf89	combined	-26.927	-40.792	-40.015
C16orf90	combined	-1.45	-22.356	-21.209
C16orf91	combined	-37.952	-68.816	-59.248
C16orf92	combined	-26.119	-33.104	-44.058
C16orf96	combined	-51.483	-68.152	-54.168
C17orf100	combined	-37.266	-70.195	-51.641
C17orf105	combined	-31.223	-59.876	-59.441
C17orf107	combined	-39.237	-64.163	-58.843
C17orf47	combined	-32.665	-40.537	-53.511
C17orf50	combined	-22.229	-42.056	-41.652
C17orf51	combined	-38.136	-69.131	-69.059
C17orf53	combined		-9.188	-7.447
C17orf53	combined	8.426
C17orf58	combined	-20.577	-40.498	-26.608
C17orf62	combined	-41.81	-56.267	-71.83
C17orf64	combined	-72.917	-80.765	-81.883
C17orf67	combined	-24.865	-64.036	-61.65
C17orf74	combined	-30.106	-70.917	-45.849
C17orf75	combined	-31.364	-74.355	-56.389
C17orf78	combined	-62.443	-65.5	-72.595
C17orf80	combined	-61.408	-94.396	-83.982
C17orf97	combined	-55.23	-77.362	-86.054
C17orf98	combined	-12.579	-46.153	-44.438
C17orf99	combined	-46.56	-85.285	-84.482
C18orf21	combined	0.764
C18orf21	combined		13.233	9.525
C18orf25	combined	-46.116	-78.212	-83.772
C18orf54	combined	-80.539	-86.425	-92.38
C18orf63	combined	-63.462	-90.505	-100.198
C18orf8	combined	-48.751	-59.363	-62.568
C19orf12	combined	-23.746	-53.9	-44.198
C19orf18	combined	-44.639	-73.741	-70.204
C19orf24	combined	-25.748	-77.497	-69.237
C19orf25	combined	-47.195	-72.466	-71.182
C19orf33	combined	-19.13	-41.196	-35.919
C19orf35	combined	-38.942	-54.651	-62.394
C19orf38	combined	-30.165	-55.451	-72.536
C19orf43	combined			-12.7
C19orf43	combined	20.83	12.261
C19orf44	combined	-42.931	-60.037	-64.158
C19orf47	combined	-61.638	-66.589	-89.904
C19orf48	combined	-55.783	-77.18	-83.613
C19orf53	combined			-4.397
C19orf53	combined	12.467	6.369
C19orf54	combined	-22.126	-73.118	-68.255
C19orf57	combined	-50.334	-77.991	-62.253
C19orf60	combined	-23.827	-45.342	-45.468
C19orf66	combined	-42.24	-86.679	-76.474
C19orf67	combined	-42.074	-88.271	-84.519
C19orf68	combined	-60.039	-82.633	-81.95
C19orf70	combined	-13.41	-43.404	-16.524
C19orf71	combined	-48.544	-75.552	-63.706
C19orf73	combined	-28.226	-60.665	-57.777
C19orf81	combined	-37.142	-80.397	-82.842
C19orf84	combined	-64.785	-73.617	-70.991
C1D	combined	28.171	17.78	15.085
C1GALT1	combined	-51.528	-78.099	-76.186
C1GALT1C1	combined	-72.247	-91.169	-84.637
C1GALT1C1L	combined	-28.6	-38.141	-37.318
C1orf100	combined	-46.993	-63.921	-79.945
C1orf105	combined	-61.481	-76.74	-79.092
C1orf106	combined	-37.97	-58.661	-69.021
C1orf109	combined	62.477	53.444	57.718
C1orf112	combined	-17.306	-28.624	-30.331
C1orf115	combined	-65.51	-89.032	-89.92
C1orf116	combined	-63.297	-83.594	-79.168
C1orf122	combined	-49.262	-54.503	-73.624
C1orf123	combined	-38.561	-70.871	-62.215
C1orf127	combined	-35.14	-62.605	-51.752
C1orf131	combined	-25.327	-30.171	-32.601
C1orf141	combined	-48.157	-76.278	-60.938
C1orf146	combined	-57.141	-72.86	-76.864
C1orf158	combined	-58.11	-90.676	-94.969
C1orf159	combined	-56.937	-82.742	-90.16
C1orf162	combined	-23.313	-46.594	-19.857
C1orf167	combined	-65.976	-80.542	-66.89
C1orf168	combined	-65.284	-55.78	-69.964
C1orf174	combined	-71.178	-96.904	-94.067
C1orf185	combined	-47.61	-68.813	-78.3
C1orf186	combined	-46.612	-77.236	-60.897
C1orf189	combined	-65.609	-80.819	-73.988
C1orf194	combined	-42.115	-73.125	-71.3
C1orf198	combined	-69.59	-79.645	-86.391
C1orf204	combined	-30.314	-34.697	-33.65
C1orf21	combined	-36.803	-78.033	-63.968
C1orf210	combined	-56.795	-71.925	-89.766
C1orf216	combined	-41.091	-57.762	-52.429
C1orf226	combined	-45.625	-50.576	-57.298
C1orf228	combined	-36.66	-43.774	-66.948
C1orf27	combined	-51.849	-40.994	-49.817
C1orf35	combined	-61.891	-83.486	-73.49
C1orf43	combined	-66.687	-74.431	-89.296
C1orf50	combined	-59.271	-58.573	-83.835
C1orf52	combined	-36.139	-66.843	-39.247
C1orf53	combined	-57.001	-70.499	-75.182
C1orf54	combined	-58.804	-63.012	-77.103
C1orf56	combined	-56.55	-59.286	-49.066
C1orf61	combined	-35.749	-57.403	-65.21
C1orf64	combined	-48.614	-73.06	-87.43
C1orf68	combined	-41.971	-69.95	-88.181
C1orf74	combined	-44.54	-68.066	-82.62
C1orf87	combined	-66.027	-89.257	-86.151
C1orf94	combined	-58.898	-76.106	-85.711
C1QA	combined	-54.345	-81.966	-76.076
C1QB	combined	-8.621	-27.563	-28.648
C1QBP	combined	37.681	35.961	46.866
C1QC	combined	-51.716	-57.887	-71.175
C1QL1	combined	-44.093	-71.992	-63.984
C1QL2	combined	-35.497	-60.289	-61.334
C1QL3	combined	-43.96	-85.1	-82.793
C1QL4	combined	-47.794	-76.522	-59.499
C1QTNF1	combined	-39.019	-67.763	-74.464
C1QTNF2	combined	-69.263	-91.975	-80.526
C1QTNF3	combined	-14.34	-9.831	-18.692
C1QTNF4	combined	-14.9	-53.268	-25.6
C1QTNF5	combined	-44.962	-66.059	-53.835
C1QTNF6	combined	-36.755	-60.069	-79.995
C1QTNF7	combined	-57.1	-75.313	-89.974
C1QTNF8	combined	-47.381	-63.362	-83.747
C1QTNF9	combined	-28.24	-69.327	-34.203
C1QTNF9B	combined	-4.706	-8.951	5.944
C1R	combined	-45.628	-88.294	-84.931
C1RL	combined	-66.609	-73.431	-72.301
C1S	combined	-36.573	-82.782	-72
C2	combined	-30.58	-40.677	-40.897
C20orf144	combined	-14.475	-45.093	-53.782
C20orf173	combined	-49.698	-49.467	-66.017
C20orf194	combined	-44.347	-74.435	-76.373
C20orf196	combined	-27.838	-56.666	-38.494
C20orf202	combined	-60.405	-80.283	-75.402
C20orf24	combined	-48.217	-58.175	-48.151
C20orf27	combined	-62.826	-60.379	-65.252
C20orf85	combined	-62.842	-79.692	-81.485
C20orf96	combined	-39.944	-75.8	-73.981
C21orf140	combined	-66.246	-79.488	-80.686
C21orf2	combined	-45.127	-70.452	-74.009
C21orf33	combined	-56.058	-83.528	-87.215
C21orf58	combined	-28.786	-58.745	-52.294
C21orf62	combined	-41.531	-82.186	-71.929
C21orf91	combined	-62.294	-75.024	-71.506
C22orf15	combined	-51.785	-70.201	-61.022
C22orf23	combined	-30.746	-63.371	-60.244
C22orf29	combined	-52.149	-78.264	-63.026
C22orf31	combined	-59.896	-74.472	-77.673
C22orf39	combined	-39.205	-80.654	-64.333
C22orf42	combined	-70.106	-92.973	-85.999
C22orf46	combined	-39.816	-74.847	-55.763
C2CD2	combined	-57.288	-58.262	-68.873
C2CD2L	combined	-38.06	-74.199	-74.96
C2CD3	combined	-33.832	-51.68	-61.909
C2CD4A	combined	-19.652	-51.156	-52.986
C2CD4B	combined	-54.79	-56.897	-63.25
C2CD4C	combined	-48.089	-69.996	-73.719
C2CD4D	combined	-36.864	-53.239	-59.492
C2CD5	combined	-63.596	-96.962	-87.69
C2orf15	combined	-66.101	-65.3	-54.513
C2orf16	combined	-67.285	-90.99	-85.103
C2orf40	combined	-46.509	-70.45	-66.738
C2orf42	combined	-44.29	-72.164	-78.573
C2orf49	combined		1.516	-24.174
C2orf49	combined	12.459
C2orf50	combined	-66.036	-78.551	-91.9
C2orf54	combined	-58.801	-73.112	-89.837
C2orf66	combined	-57.47	-77.339	-75.264
C2orf68	combined	-9.443	-40.434	-37.802
C2orf69	combined	-53.764	-70.403	-78.633
C2orf70	combined	-67.487	-83.158	-75.975
C2orf71	combined	-40.429	-44.015	-49.497
C2orf72	combined	-47.613	-81.98	-84.455
C2orf73	combined	-59.976	-70.798	-85.604
C2orf74	combined	-37.455	-73.982	-69.309
C2orf76	combined	-3.256	2.012	-12.922
C2orf78	combined	-53.391	-70.141	-66.988
C2orf80	combined	-57.118	-90.215	-79.826
C2orf81	combined	-52.761	-34.312	-29.871
C2orf82	combined	-77.177	-93.622	-95.849
C2orf83	combined	-52.587	-85.426	-83.954
C2orf88	combined	-47.252	-84.485	-78.766
C2orf91	combined	-40.062	-55.53	-54.845
C3	combined	-68.524	-66.521	-71.467
C3AR1	combined	-36.426	-79.796	-90.743
C3orf14	combined	-58.418	-50.895	-58.023
C3orf18	combined	-47.763	-66.261	-63.657
C3orf20	combined	-54.042	-76.972	-83.638
C3orf22	combined	-65.383	-84.6	-78.438
C3orf30	combined	-63.348	-75.747	-82.485
C3orf33	combined	-58.708	-78.055	-89.417
C3orf38	combined	-50.27	-71.31	-80.611
C3orf52	combined	-17.196	-82.311	-67.931
C3orf58	combined	-63.228	-69.21	-68.768
C3orf62	combined	-45.05	-63.985	-65.987
C3orf67	combined	-60.991	-89.522	-88.445
C3orf70	combined	-67.004	-70.13	-74.765
C3orf80	combined	-41.752	-69.481	-63.27
[truncated: 16,836 more rows]

## Sheet: BAGEL sub-library A.
Gene symbol	Sub-library	bulk	SCC11	SCC12
A1BG	A	-33.591	-41.273	-35.307
A1CF	A	-30.634	-22.612	-34.943
A2M	A	-30.251	-31.555	-33.313
A2ML1	A	-42.667	-47.81	-39.033
A3GALT2	A	-43.822	-47.114	-49.817
A4GALT	A	-39.605	-38.84	-39.854
A4GNT	A	-15.086	-32.887	-26.474
AAAS	A	-22.123	-23.996	-24.219
AACS	A	-21.028	-40.07	-47.51
AADAC	A	-42.13	-40.011	-42.789
AADACL2	A	-38.342	-50.566	-48.729
AADACL3	A	-38.64	-41.929	-49.899
AADACL4	A	-41.152	-44.232	-51.515
AADAT	A	-42.841	-47.14	-53.038
AAED1	A	-27.387	-39.934	-34.745
AAGAB	A	-6.388	-6.862	-8.067
AAK1	A	-21.609	-32.019	-18.967
AAMDC	A	-21.935	-40.346	-34.722
AAMP	A	27.647	16.685	13.768
AANAT	A	-24.79	-37.339	-45.444
AAR2	A	-6.905	-11.049	-10.617
AARD	A	-22.439	-33.361	-30.69
AARS	A	30.44	22.634	25.901
AARS2	A	26.948	24.665	24.874
AASDH	A	-20.857	-29.213	-26.822
AASDHPPT	A	29.556	21.386	23.504
AASS	A	-27.382	-47.677	-45.17
AATF	A	23.237	17.812	15.702
AATK	A	-7.757	-25.335	-37.352
ABAT	A	-9.844	-48.516	-33.928
ABCA1	A	-43.204	-48.927	-54.209
ABCA10	A	-35.784	-44.51	-53.427
ABCA12	A	-28.922	-44.78	-48.513
ABCA13	A	-26.594	-29.23	-30.386
ABCA2	A	-26.861	-37.017	-42.806
ABCA3	A	-19.586	-28.381	-28.051
ABCA4	A	-22.311	-36.971	-13.826
ABCA5	A	-29.314	-44.205	-50.313
ABCA6	A	-43.356	-36.695	-45.872
ABCA7	A	-14.069	-32.943	-33.519
ABCA8	A	-24.286	-45.6	-40.711
ABCA9	A	-42.584	-49.362	-54.47
ABCB1	A	-25.523	-36.978	-25.253
ABCB10	A	-22.604	-20.326	-33.426
ABCB11	A	-35.836	-37.033	-41.086
ABCB4	A	-20.081	-39.28	-37.22
ABCB5	A	-33.722	-34.287	-45.451
ABCB6	A	-33.63	-46.644	-49.849
ABCB7	A	20.76	17.422	12.579
ABCB8	A	-29.373	-23.727	-30.733
ABCB9	A	-41.294	-49.187	-36.739
ABCC1	A	-29.625	-32.848	-32.15
ABCC10	A	-28.932	-36.607	-34.608
ABCC11	A	-11.512	-38.953	-35.896
ABCC12	A	-26.34	-28.916	-52.466
ABCC2	A	-23.45	-27.426	-20.714
ABCC3	A	-28.531	-39.114	-47.669
ABCC4	A	-43.175	-46.328	-49.841
ABCC5	A	-29.66	-36.637	-29.978
ABCC6	A	-5.579	-12.785	-10.584
ABCC8	A	-33.088	-41.51	-38.198
ABCC9	A	-14.541	-30.886	-42.31
ABCD1	A	-29.38	-28.87	-31.895
ABCD2	A	-35.979	-40.914	-30.248
ABCD3	A	-30.789	-46.104	-45.024
ABCD4	A	-29.244	-24.868	-2.834
ABCE1	A	30.318	26.432	26.503
ABCF1	A	23.2	26.258	25.089
ABCF2	A	-26.36	-40.387	-44.312
ABCF3	A	-30.959	-41.382	-35.351
ABCG1	A	-30.033	-44.768	-48.6
ABCG2	A	-27.42	-49.377	-38.393
ABCG4	A	-37.559	-30.055	-50.633
ABCG5	A	-34.41	-36.333	-2.373
ABCG8	A	-34.804	-40.066	-35.923
ABHD1	A	-21.732	-48.09	-42.214
ABHD10	A	-38.187	-34.014	-39.201
ABHD11	A			3.084
ABHD11	A	16.596	15.664
ABHD12	A	-26.148	-31.268	-31.717
ABHD12B	A	-25.451	-17.375	-9.757
ABHD13	A	-36.518	-43.069	-56.878
ABHD14B	A	-20.552	-35.192	-24.205
ABHD15	A	-31.253	-32.076	-31.835
ABHD16A	A	-36.708	-37.219	-36.062
ABHD16B	A	-35.318	-48.327	-46.805
ABHD17A	A	-20.774	-30.329	-30.582
ABHD17B	A	-34.857	-42.568	-48.52
ABHD17C	A	-23.097	-13.083	-41.334
ABHD18	A	-21.271	-33.971	-25.349
ABHD2	A	-25.026	-24.73	-6.202
ABHD3	A	-36.783	-27.363	-37.488
ABHD4	A	-36.15	-41.353	-42.282
ABHD5	A	-40.342	-37.97	-37.439
ABHD6	A	-26.699	-41.736	-46.823
ABHD8	A	-26.288	-36.399	-37.489
ABI1	A	-31.571	-38.936	-43.168
ABI2	A	-30.708	-33.74	-41.65
ABI3	A	-21.243	-27.746	-21.61
ABI3BP	A	-33.529	-43.887	-43.443
ABL1	A	-17.195	-24.561	-29.287
ABL2	A	-28.654	-39.644	-49.854
ABLIM1	A	-28.076	-30.553	-41.783
ABLIM2	A	-36.086	-48.042	-47.227
ABLIM3	A	-34.034	-35.481	-49.55
ABO	A	-37.494	-32.569	-41.212
ABR	A	-43.4	-31.885	-38.021
ABRA	A	-24.39	-45.332	-47.275
ABRACL	A	-38.082	-40.862	-52.49
ABT1	A	31.495	21.508	17.455
ABTB1	A	-36.038	-38.883	-30.778
ABTB2	A	-29.286	-43.726	-46.756
ACAA1	A	-26.185	-33.625	-45.52
ACAA2	A	-34.251	-47.498	-44.57
ACACA	A		-17.343	-9.739
ACACA	A	7.271
ACACB	A	-34.668	-49.446	-45.482
ACAD10	A	-17.93	-27.679	-11.056
ACAD11	A	-25.999	-45.359	-37.488
ACAD8	A	-40.889	-47.526	-51.024
ACAD9	A	2.111	-14.519	-16.606
ACADL	A	-29.704	-44.518	-49.603
ACADM	A	-33.123	-37.096	-46.264
ACADS	A	-30.351	-46.675	-48.754
ACADSB	A	-25.266	-44.366	-45.8
ACADVL	A	-12.346	-19.04	-28.389
ACAN	A		-16.793	-4.614
ACAN	A	8.173
ACAP1	A	-37.273	-38.434	-36.534
ACAP2	A	-40.019	-38.261	-45.369
ACAP3	A	1.773	-10.21	-6.778
ACAT1	A	-33.877	-20.145	-42.308
ACAT2	A	-37.529	-23.635	-35.747
ACBD3	A	-35.054	-38.708	-29.528
ACBD4	A	-15.761	-12.247	-27.906
ACBD5	A	-34.826	-44.038	-51.624
ACBD6	A	-9.703	-43.438	-48.496
ACBD7	A	-18.619	-30.908	-41.267
ACCS	A	-39.466	-25.607	-28.036
ACCSL	A	-18.181	-28.974	-21.753
ACD	A	-17.994	-34.596	-27.423
ACE	A	-24.557	-22.14	-37.406
ACE2	A	-37.11	-54.391	-57.842
ACER1	A	-28.815	-45.611	-44.319
ACER2	A	-41.509	-41.88	-55.112
ACER3	A	-29.962	-39.035	-42.745
ACHE	A	-9.785	-39.692	-38.461
ACIN1	A			1.245
ACIN1	A	18.869	14.306
ACKR1	A	-26.63	-50.899	-44.349
ACKR2	A	-31.395	-36.668	-40.847
ACKR3	A	-43.976	-48.915	-53.425
ACKR4	A	-7.742	-23.145	-15.229
ACLY	A	27.584	21.009	23.176
ACMSD	A	-30.843	-33.638	-27.239
ACO1	A	-40.472	-31.168	-40.497
ACO2	A	11.816	12.335	10.928
ACOD1	A	-43.927	-46.521	-49.305
ACOT1	A	-33.025	-46.669	-42.713
ACOT11	A	-30.032	-47.8	-42.796
ACOT12	A	-9.818	-34.704	-24.886
ACOT13	A	-40.317	-48.988	-50.962
ACOT2	A	-31.456	-35.147	-19.724
ACOT4	A	-31.074	-23.388	-36.754
ACOT6	A	-24.387	-38.619	-39.752
ACOT7	A	-38.627	-43.563	-34.455
ACOT8	A	-42.666	-49.949	-49.923
ACOT9	A	-40.159	-42.035	-52.783
ACOX1	A	-38.646	-48.384	-45.392
ACOX2	A	-41.9	-31.397	-37.926
ACOX3	A	-24.174	-35.457	-50.425
ACOXL	A	-19.9	-33.643	-16.785
ACP1	A	-39.492	-45.929	-50.539
ACP2	A	-33.841	-17.862	-34.574
ACP5	A	-0.23	-18.862	-10.997
ACP6	A	-39.062	-33.173	-37.508
ACP7	A	-5.284	-29.134	-21.6
ACPP	A	-35.738	-43.805	-44.674
ACPT	A	-20.994	-36.25	-23.234
ACR	A	-10.831	-25.38	-25.673
ACRBP	A	-19.317	-6.485	-12.944
ACRV1	A	-34.222	-53.265	-50.71
ACSBG1	A	-26.054	-29.051	-26.099
ACSBG2	A	-30.115	-35.188	-41.789
ACSF2	A	-9.388	-19.054	-36.19
ACSF3	A	-26.812	-42.101	-43.087
ACSL1	A	-46.225	-51.462	-54.97
ACSL3	A	-40.431	-45.291	-31.196
ACSL4	A	-26.065	-30.573	-43.738
ACSL5	A	-26.86	-38.192	-36.919
ACSL6	A	-25.298	-33.614	-34.815
ACSM1	A	-27.346	-37.115	-41.501
ACSM2A	A	-42.138	-37.546	-44.65
ACSM2B	A	-32.939	-34.928	-34.015
ACSM3	A	-34.824	-29.533	-38.612
ACSM4	A	-38.615	-44.948	-47.805
ACSM5	A	-41.316	-33.256	-44.159
ACSM6	A	-34.131	-45.135	-49.964
ACSS1	A	-44.34	-49.263	-47.931
ACSS2	A	-27.134	-33.442	-30.681
ACSS3	A	-39.409	-49.265	-45.447
ACTA1	A	-31.22	-42.197	-42.415
ACTA2	A	-30.61	-38.916	-45.896
ACTB	A			4.897
ACTB	A	9.688	23.587
ACTBL2	A	-30.863	-45.108	-21.61
ACTC1	A	-20.793	-30.559	-20.962
ACTG1	A	2.191		-2.453
ACTG1	A		6.722
ACTG2	A	-17.654	-23.391	-11.253
ACTL10	A	-25.101	-42.069	-42.987
ACTL6A	A	25.357	23.617	18.759
ACTL6B	A	-26.682	-42.813	-38.079
ACTL7A	A	-32.026	-32.057	-37.388
ACTL7B	A	-22.678	-36.757	-49.783
ACTL8	A	-42.626	-38.043	-46.731
ACTL9	A	-30.076	-35.196	-47.296
ACTN1	A	-23.664	-43.024	-48.415
ACTN2	A	-39.84	-34.285	-54.049
ACTN3	A	-24.758	-42.319	-31.718
ACTN4	A	-40.817	-44.651	-45.176
ACTR10	A	24.957	21.951	25.614
ACTR1A	A	28.783	22.317	23.904
ACTR1B	A	-28.923	-42.714	-39.485
ACTR2	A	33.288	24.537	24.236
ACTR3	A	26.854	26.232	25.051
ACTR3B	A	-33.651	-48.777	-43.304
ACTR3C	A	-38.032	-37.344	-43.847
ACTR5	A	23.554	26.256	19.67
ACTR6	A	32.185	26.457	25.712
ACTR8	A	21.397	19.5	16.236
ACTRT1	A	-43.374	-48.956	-51.391
ACTRT2	A	-44.405	-49.814	-52.585
ACTRT3	A	-33.549	-41.549	-33.31
ACVR1	A	-33.208	-32.283	-44.781
ACVR1B	A	-23.644	-39.644	-42.083
ACVR1C	A	-39.289	-37.746	-36.587
ACVR2A	A	-25.52	-22.826	-32.341
ACVR2B	A	-21.63	-38.895	-48.061
ACVRL1	A	-29.897	-36.472	-19.998
ACY3	A	-15.588	-31.412	-36.099
ACYP1	A	-32.125	-51.011	-49.651
ACYP2	A	-21.513	-24.253	-45.819
ADA	A	-33.072	-36.588	-45.193
ADAD1	A	-30.734	-45.087	-53.448
ADAD2	A	-27.295	-33.68	-44.058
ADAL	A	-19.608	-25.864	-27.096
ADAM10	A	-40.003	-47.985	-49.511
ADAM11	A	-12	-34.055	-34.52
ADAM12	A	-39.327	-48.335	-50.1
ADAM15	A	-17.441	-25.976	-21.129
ADAM17	A	-26.78	-44.653	-45.269
ADAM18	A	-31.188	-30.852	-32.87
ADAM19	A	-41.12	-41.392	-49.197
ADAM2	A	-26.592	-35.131	-34.129
ADAM20	A	-36.413	-47.076	-55.045
ADAM21	A	-33.125	-36.265	-38.794
ADAM22	A	-28.916	-24.511	-29.488
ADAM23	A	-38.244	-36.949	-42.704
ADAM28	A	-34.161	-43.734	-48.662
ADAM29	A	-41.224	-35.799	-53.197
ADAM30	A	-21.938	-23.14	-32.279
ADAM32	A	-33.765	-33.198	-38.083
ADAM33	A	-25.546	-31.827	-32.613
ADAM7	A	-35.252	-44.876	-42.137
ADAM8	A	-38.906	-43.264	-48.865
ADAM9	A	5.425	-21.45	-34.419
ADAMDEC1	A	-43.791	-38.262	-51.239
ADAMTS1	A	-30.371	-33.362	-48.152
ADAMTS10	A	-27.021	-44.172	-45.234
ADAMTS12	A	-37.467	-39.667	-29.428
ADAMTS13	A	-9.676	-36.295	-24.749
ADAMTS14	A	-13.822	-30.852	-36.702
ADAMTS15	A	-47.958	-44.039	-51.896
ADAMTS16	A	-36.438	-36.711	-44.942
ADAMTS17	A	-38.225	-51.323	-52.464
ADAMTS18	A	-41.43	-41.259	-47.579
ADAMTS19	A	-44.072	-42.524	-50.527
ADAMTS2	A	-35.631	-43.461	-51.422
ADAMTS20	A	-28.506	-31.749	-31.04
ADAMTS3	A	-32.39	-34.721	-40.879
ADAMTS4	A	-17.547	-23.931	-22.12
ADAMTS5	A	-21.233	-41.393	-31.982
ADAMTS6	A	-20.2	-33.505	-29.205
ADAMTS7	A	1.471	-17.525	1.166
ADAMTS8	A	-37.627	-50.324	-56.611
ADAMTS9	A	-41.608	-45.896	-46.456
ADAMTSL1	A	-31.113	-41.483	-47.536
ADAMTSL2	A	-36.716	-49.446	-38.27
ADAMTSL3	A	-25.046	-36.624	-29.888
ADAMTSL4	A	-30.241	-32.866	-19.165
ADAMTSL5	A	-29.22	-42.941	-43.773
ADAP1	A	-39.493	-39.502	-43.436
ADAP2	A	-26.102	-15.82	-30.216
ADAR	A	-28.8	-42.863	-39.353
ADARB1	A	-24.226	-47.369	-29.495
ADARB2	A	-35.436	-32.407	-36.832
ADAT1	A	-33.88	-47.464	-46.562
ADAT2	A	23.794	24.718	16.836
ADAT3	A	27.626	22.965	20.902
ADCK1	A	-39.15	-48.72	-52.237
ADCK2	A	-28.429	-35.498	-40.1
ADCK5	A	-22.292	-41.657	-46.103
ADCY1	A	-22.125	-46.936	-49.185
ADCY10	A	-16.427	-33.455	-39.133
ADCY2	A	-38.145	-49.293	-52.643
ADCY3	A	-41.621	-40.016	-55.91
ADCY4	A	-12.434	-31.896	-17.916
ADCY5	A	-25.736	-36.138	-35.631
ADCY6	A	-29.004	-35.951	-36.072
ADCY7	A	-27.736	-46.275	-45.963
ADCY8	A	-31.487	-44.983	-41.125
ADCY9	A	-19.627	-42.934	-45.174
ADCYAP1	A	-36.398	-36.495	-50.041
ADCYAP1R1	A	-18.285	-32.601	-34.452
ADD1	A	-16.116	-36.701	-27.552
ADD2	A	-6.97	-14.738	-4.816
ADD3	A	-32.733	-36.255	-43.958
ADGB	A	-25.799	-40.663	-45.726
ADGRA1	A	-43.111	-50.372	-54.179
ADGRA2	A	-8.08	-30.967	-34.64
ADGRA3	A	-34.891	-47.51	-45.778
ADGRB1	A	-43.129	-41.235	-47.593
ADGRB2	A	-18.125	-18.203	-29.352
ADGRB3	A	-29.721	-44.615	-49.947
ADGRD1	A	-36.919	-48.342	-46.525
ADGRE1	A	-38.705	-37.86	-51.658
ADGRE2	A	-21.462	-42.209	-24.879
ADGRE3	A	-34.707	-40.813	-32.212
ADGRE5	A	-25.384	-39.881	-39.716
ADGRF1	A	-40.858	-42.157	-42.001
ADGRF3	A	-24.414	-25.429	-17.52
ADGRF4	A	-43.576	-44.848	-50.307
ADGRF5	A	-23.121	-42.003	-34.923
ADGRG1	A	-14.955	-46.407	-39.737
ADGRG2	A	-13.415	-21.525	-33.985
ADGRG3	A	-25.049	-31.801	-37.104
ADGRG4	A	-46.127	-50.326	-55.349
ADGRG5	A	-34.737	-41.431	-37.753
ADGRG6	A	-31.138	-31.774	-44.327
ADGRG7	A	-31.98	-35.602	-45.503
ADGRL1	A	-32.651	-39.319	-42.785
ADGRL2	A	-31.66	-44.538	-44.276
ADGRL3	A	-12.674	-32.765	-29.317
ADGRL4	A	-32.94	-52.136	-53.33
ADGRV1	A	-19.073	-32.466	-32.77
ADH1A	A	-27.617	-35.616	-41.423
ADH1B	A	-25.22	-40.45	-50.957
ADH1C	A	-26.346	-47.921	-52.116
ADH4	A	-25.287	-41.059	-38.317
ADH5	A	-1.843	-10.643	-8.351
ADH6	A	-33.251	-50.945	-45.296
ADH7	A	-43.958	-47.334	-39.565
ADHFE1	A	-13.026	-33.283	-32.619
ADI1	A	-35.85	-29.078	-46.44
ADIG	A	-24.317	-42.805	-38.249
ADIPOQ	A	-39.635	-30.19	-52.269
ADIPOR1	A	-1.559	-28.061	-8.018
ADIPOR2	A	-39.685	-47.589	-44.068
ADIRF	A	-16.059	-30.886	-35.338
ADK	A	-29.712	-32.866	-34.497
ADM	A	-30.737	-45.007	-42.145
ADM2	A	-27.444	-30.793	-30.293
ADM5	A	-6.657	-35.996	-33.567
ADNP	A	-22.235	-24.989	-19.142
ADNP2	A	-1.207	-48.006	-43.156
ADO	A	-22.074	-26.748	-28.353
ADORA1	A	-24.874	-48.814	-51.37
ADORA2A	A	-33.765	-33.481	-49.718
ADORA2B	A	-13.069	-37.787	-39.095
ADORA3	A	-21.121	-30.828	-27.506
ADPGK	A	-14.501	-36.02	-20.89
ADPRH	A	-27.832	-30.165	-25.915
ADPRHL1	A	-26.74	-40.694	-45.059
ADPRHL2	A	-23.567	-27.051	-33.539
ADPRM	A	-40.711	-48.527	-47.87
ADRA1A	A	-36.505	-51.165	-48.671
ADRA1B	A	-37.58	-44.455	-53.013
ADRA1D	A	-31.499	-35.629	-42.53
ADRA2A	A	-36.05	-34.999	-41.906
ADRA2B	A	-40.097	-42.919	-38.45
ADRA2C	A	-33.14	-46.211	-43.617
ADRB1	A	-39.629	-39.167	-49.286
ADRB2	A	-25.236	-49.24	-50.761
ADRB3	A	-32.58	-38.148	-44.948
ADRM1	A	-6.491	-9.421	-7.861
ADSL	A	30.618	26.466	24.922
ADSS	A	32.198	26.489	26.506
ADSSL1	A	-30.831	-41.43	-43.151
ADTRP	A	-42.893	-50.789	-46.971
AEBP1	A	-21.541	-31.693	-35.927
AEBP2	A	-19.62	-21.942	-30.849
AEN	A	-8.198	-24.753	-13.445
AES	A	-42.297	-44.509	-45.468
AFAP1	A	-28.552	-34.52	-18.011
AFAP1L1	A	-30.091	-32.76	-36.702
AFAP1L2	A	-23.008	-23.376	-24.515
AFDN	A	-45.067	-44.416	-58.225
AFF1	A	-36.098	-41.076	-49.534
AFF2	A	-38.882	-46.71	-38.403
AFF3	A	-17.9	-24.753	-28.111
AFF4	A	-14.155	-37.104	-44.77
AFG3L2	A	14.901	8.79	13.334
AFM	A	-25.049	-36.227	-40.505
AFMID	A	-38.547	-40.943	-49.027
AFP	A	-26.531	-50.096	-50.246
AFTPH	A	-33.424	-29.773	-35.164
AGA	A	-31.536	-26.229	-39.152
AGAP1	A	-37.451	-51.787	-56.414
AGAP2	A		-7.753	-8.863
AGAP2	A	8.247
AGAP3	A	-36.96	-52.274	-45.696
AGAP4	A	34.896	19.928	22.182
AGAP5	A	30.291	25.916	24.731
AGAP6	A	20.244	23.982	24.137
AGAP9	A	11.25	12.127	8.458
AGBL1	A	-16.352	-36.608	-34.178
AGBL2	A	-0.359	-21.197	-15.797
AGBL3	A	-39.573	-42.253	-46.962
AGBL4	A	-24.934	-33.292	-36.29
AGBL5	A	-28.097	-20.852	-28.584
AGER	A	-28.288	-24.658	-33.321
AGFG1	A	-24.936	-26.393	-22.644
AGFG2	A	-34.158	-43.077	-47.455
AGGF1	A	-12.357	-27.664	-15.778
AGK	A	-12.794	-29.3	-18.511
AGL	A	-26.676	-42.064	-44.411
AGMAT	A	-27.041	-26.436	-32.58
AGMO	A	-31.207	-38.495	-50.063
AGO1	A	-23.657	-35.316	-38.005
AGO2	A	-20.709	-39.307	-40.896
AGO3	A	-24.525	-33.684	-47.639
AGO4	A	-18.89	-35.117	-33.884
AGPAT1	A	-23.059	-38.632	-35.988
AGPAT2	A	-33.27	-34.955	-40.439
AGPAT3	A	-25.824	-34.078	-19.951
AGPAT4	A	-44.758	-43.356	-53.91
AGPAT5	A	-9.812	-47.648	-49.702
AGPS	A	-35.054	-44.869	-50.77
AGR2	A	-33.311	-38.657	-45.076
AGR3	A	-26.91	-34.262	-39.817
AGRN	A	-26.653	-45.117	-51.093
AGRP	A	-18.005	-39.061	-34.382
AGT	A	-40.507	-48.195	-54.787
AGTPBP1	A	-41.535	-50.54	-38.366
AGTR1	A	-19.187	-42.556	-36.163
AGTR2	A	-44.739	-47.892	-49.795
AGTRAP	A	-39.63	-37.999	-45.268
AGXT	A	-23.914	-30.607	-42.535
AGXT2	A	-23.843	-36.526	-44.38
AHCTF1	A	16.888	17.151	19.799
AHCY	A	29.034	24.723	26.547
AHCYL1	A	-18.953	-19.744	-37.697
AHCYL2	A	-38.524	-46.946	-49.329
AHDC1	A	-37.495	-35.999	-50.31
AHI1	A	-40.188	-46.281	-44.459
AHNAK	A	-15.455	-34.826	-34.591
AHNAK2	A	-41.343	-49.908	-40.121
AHR	A	-26.059	-32.306	-45.848
AHRR	A	-34.755	-44.253	-39.188
AHSA1	A	-10.983	-21.077	-42.263
AHSA2	A	-19.3	-31.731	-27.145
AHSG	A	-41.716	-31.332	-42.407
AHSP	A	-25.634	-36.955	-37.491
AICDA	A	-40.067	-48.568	-43.369
AIDA	A	-8.988	-18.467	-26.718
AIF1	A	-34.828	-47.342	-41.512
AIF1L	A	-40.099	-46.906	-38.486
AIFM1	A	25.639	24.61	16.44
AIFM2	A	-36.509	-47.224	-28.435
AIFM3	A	-33.191	-34.821	-35.022
AIG1	A	-38.164	-44.598	-41.035
AIM2	A	-32.735	-43.455	-42.474
AIMP1	A	-20.705	-44.873	-47.671
AIMP2	A	-19.748	-35.476	-50.587
AIP	A	-20.349	-13.238	-11.741
AIPL1	A	-38.943	-43.781	-41.487
AIRE	A	-32.016	-49.607	-50.101
AJAP1	A	-34.387	-43.136	-44.57
AJUBA	A	-25.796	-40.522	-52.374
AK1	A	-36.63	-34.696	-38.125
AK2	A	26.912	26.442	13.166
AK3	A	-29.793	-45.175	-49.766
AK4	A	-18.595	-27.203	-2.736
AK5	A	-27.834	-32.988	-41.031
AK6	A	30.647	26.462	24.786
AK7	A	-29.713	-44.764	-50.761
AK8	A	-21.68	-39.465	-30.651
AK9	A	-35.796	-42.443	-49.726
AKAIN1	A	-42.531	-44.063	-47.415
AKAP1	A	-29.802	-32.549	-33.864
AKAP10	A	-33.804	-42.931	-35.993
AKAP11	A	-31.367	-39.031	-34.496
AKAP12	A	-26.458	-40.048	-44.688
AKAP13	A	-15.546	-36.387	-33.356
AKAP14	A	-32.925	-51.814	-49.098
AKAP17A	A	-28.011	-47.084	-46.708
AKAP3	A	-39.234	-41.725	-30.557
AKAP4	A	-46.28	-36.348	-51.971
AKAP5	A	-17.439	-40.148	-38.964
AKAP6	A	-30.55	-40.399	-44.837
AKAP7	A	-16.885	-50.377	-41.148
AKAP8	A	-23.959	-31.236	-33.591
AKAP8L	A	-13.569	-20.505	-26.893
AKAP9	A	-20.821	-41.208	-42.994
AKIP1	A	-28.881	-25.883	-40.542
AKIRIN1	A	-10.919	-21.916	-25.269
AKIRIN2	A	12.026	12.545	7.604
AKNA	A	-35.904	-49	-49.586
AKNAD1	A	-5.497	-29.807	-16.304
AKR1A1	A	-7.853	-22.382	-21.216
AKR1B1	A	-34.823	-35.196	-49.161
AKR1B10	A	-32.811	-50.628	-53.233
AKR1B15	A	-28.099	-29.042	-34.957
AKR1C1	A	-41.905	-45.281	-50.497
AKR1C2	A	-41.366	-48.795	-56.411
AKR1C3	A	-41.211	-37.941	-44.882
AKR1C4	A	-27.003	-35.014	-51.121
AKR1D1	A	-30.293	-45.132	-49.513
AKR1E2	A	-42.579	-44.563	-48.818
AKR7A2	A	-27.887	-43.436	-45.86
AKR7A3	A	-15.726	-29.871	-38.934
AKT1	A	-33.272	-42.236	-41.401
AKT1S1	A	-6.224	-33.138	-20.001
AKT2	A	-11.96	-33.104	-31.859
AKT3	A	-15.682	-39.111	-28.191
AKTIP	A	-22.032	-32.163	-32.943
ALAD	A	-14.384	-34.496	-34.493
ALAS1	A	-25.379	-35.84	-39.492
ALAS2	A	-39.912	-45.023	-51.061
ALB	A	-18.686	-40.552	-38.804
ALCAM	A	-19.212	-22.201	-28.4
ALDH16A1	A	-37.876	-36.176	-47.228
ALDH18A1	A	-15.111	-12.114	-24.847
ALDH1A1	A	-30.879	-36.561	-52.661
ALDH1A2	A	-28.464	-40.849	-50.688
ALDH1A3	A	-35.089	-47.245	-52.085
ALDH1B1	A	-19.332	-38.018	-45.692
ALDH1L1	A	-15.428	-41.639	-36.415
ALDH1L2	A	-6.937	-31.796	-30.313
ALDH2	A	-31.69	-45.768	-34.984
ALDH3A1	A	-43.55	-36.702	-45.896
ALDH3A2	A	-24.102	-47.941	-34.678
ALDH3B1	A	-20.122	-33.989	-30.953
ALDH3B2	A	-28.494	-30.445	-28.82
ALDH4A1	A	-36.332	-45.084	-45.756
ALDH5A1	A	-31.146	-44.588	-44.22
ALDH6A1	A	-36.633	-29.475	-31.868
ALDH7A1	A	-35.429	-38.247	-42.625
ALDH8A1	A	-32.296	-37.891	-36.374
ALDH9A1	A	-39.676	-47.37	-44.049
ALDOA	A	20.652	26.146	26.529
ALDOB	A	-39.968	-51.428	-49.261
ALDOC	A	-24.317	-15.265	-8.547
ALG1	A	34.014	26.362	26.484
ALG10	A	-0.355	-1.855
ALG10	A			6.717
ALG10B	A	-16.061	-15.947	-14.677
ALG11	A	19.258	10.704	19.844
ALG12	A	-31.12	-35.909	-39.228
ALG13	A	27.759	20.973	21.112
ALG14	A	29.537	26.476	26.523
ALG1L	A		-5.807	-4.454
ALG1L	A	8.773
ALG1L2	A	-17.302	-15.226	-18.147
ALG2	A	33.852	26.459	25.168
ALG3	A	-37.865	-38.179	-41.981
ALG5	A	-22.412	2.71	-4.18
ALG6	A	-19.782	-19.267	-11.466
ALG8	A	-14.139	-2.005	-9.301
ALG9	A	-23.739	-24.379	-46.419
ALK	A	-32.669	-35.579	-47.648
ALKBH1	A	-24.418	-33.809	-28.602
ALKBH2	A	-36.254	-39.692	-37.678
ALKBH3	A	-14.006	-29.887	-42.766
ALKBH4	A	-23.616	-42.572	-33.501
ALKBH5	A	-15.894	-17.262	-33.796
ALKBH6	A	-24.683	-27.589	-28.313
ALKBH7	A	-32.024	-33.036	-40.378
ALKBH8	A	-4.399	-9.267	-21.041
ALLC	A	-38.493	-41.873	-42.306
ALMS1	A	-17.847	-27.608	-22.02
ALOX12	A	-34.161	-36.176	-39.953
ALOX12B	A	-21.132	-32.697	-38.401
ALOX15	A	-28.67	-37.598	-37.489
ALOX15B	A	-35.849	-28.843	-12.789
ALOX5	A	-31.995	-43.334	-38.794
ALOX5AP	A	-34.1	-39.773	-32.853
ALOXE3	A	-29.188	-42.869	-26.439
ALPI	A	-34.274	-42.708	-46.858
ALPK1	A	-18.576	-33.862	-25.239
ALPK2	A	-45.402	-51.731	-53.375
ALPK3	A	-13.412	-11.742	-31.711
ALPL	A	-38.947	-29.51	-33.387
ALPP	A	-44.431	-51.932	-53.159
ALPPL2	A	-36.767	-46.934	-50.721
ALS2	A	-24.954	-37.024	-29.04
ALS2CL	A	-17.595	-11.361	-17.507
ALS2CR12	A	-33.176	-45.709	-50.964
ALX1	A	-28.734	-46.819	-46.15
ALX3	A	-4.359	-25.801	-15.851
ALX4	A	-33.372	-44.888	-45.444
ALYREF	A	19.014	26.281	26.491
AMACR	A	-41.542	-39.03	-45.577
AMBN	A	-22.822	-28.103	-30.882
AMBP	A	-37.412	-27.351	-42.839
AMBRA1	A	-45.008	-45.887	-48.086
AMD1	A	7.659	21.537	20.283
AMDHD1	A	-25.54	-46.545	-42.899
AMDHD2	A	-32.787	-37.696	-31.719
AMELX	A	-38.699	-49.444	-55.186
AMELY	A	-41.726	-46.798	-52.801
AMER1	A	-46.734	-46.125	-46.723
AMER2	A	-27.887	-38.704	-34.797
AMER3	A	-16.143	-11.129	-18.947
AMFR	A	-18.704	-36.132	-40.908
AMH	A	-29.434	-44.933	-31.728
AMHR2	A	-24.794	-42.297	-25.35
AMIGO1	A	-8.289	-39.163	-22.133
AMIGO2	A	-18.13	-39.439	-39.461
AMIGO3	A	-29.276	-33.948	-24.861
AMMECR1	A	-41.118	-35.811	-44.845
AMMECR1L	A	-14.526	-33.193	-25.314
AMN	A	-36.83	-45.197	-53.327
AMN1	A	-38.285	-40.339	-36.868
AMOT	A	-19.463	-37.624	-38.5
AMOTL1	A	-44.244	-42.779	-40.879
AMOTL2	A	-28.004	-32.231	-32.807
AMPD1	A	-22.073	-26.956	-25.389
AMPD2	A	-11.543	-44.145	-29.114
AMPD3	A	-14.825	-36.095	-40.111
AMPH	A	-27.009	-37.564	-38.737
AMT	A	-28.853	-13.989	-42.404
AMTN	A	-41.825	-41.604	-49.058
AMY1B	A	-30.064	-33.791	-35.948
AMY2A	A	-22.359	-14.134	-26.39
AMY2B	A	-7.086	-11.902	-10.186
AMZ1	A	-30.115	-38.381	-42.92
AMZ2	A	-37.017	-48.434	-50.424
ANAPC1	A	29.918	24.927	24.768
ANAPC10	A	30.122	24.19	22.04
ANAPC11	A	20.363	26.457	26.499
ANAPC13	A	5.919	0.606	-21.42
ANAPC15	A	28.696	23.029	22.798
ANAPC16	A	-32.223	-44.223	-49.841
ANAPC2	A	34.851	26.479	26.525
ANAPC4	A	33.055	26.455	24.721
ANAPC5	A	34.321	26.053	25.406
ANAPC7	A	-46.065	-39.067	-56.255
ANG	A	-21.287	-32.081	-28.571
ANGEL1	A	-14.413	-36.092	-34.296
ANGEL2	A	-37.962	-29.187	-51.014
ANGPT1	A	-44.689	-49.194	-53.454
ANGPT2	A	-30.739	-47.732	-50.029
ANGPT4	A	-37.169	-53.623	-37.098
ANGPTL1	A	-13.346	-40.675	-40.713
ANGPTL2	A	-27.141	-48.332	-41.225
ANGPTL3	A	-28.931	-42.083	-38.742
ANGPTL4	A	-36.036	-42.538	-38.002
ANGPTL5	A	-15.794	-41.676	-40.991
ANGPTL6	A	-30.361	-19.832	-40.434
ANGPTL7	A	-23.486	-35.28	-46.86
ANGPTL8	A	-28.576	-32.548	-48.868
ANHX	A	-13.937	-33.799	-25.576
ANK1	A	-15.693	-15.938	-29.848
ANK2	A	-27.503	-38.604	-35.522
ANK3	A	-30.379	-43.39	-49.412
ANKAR	A	-20.661	-33.557	-51.968
ANKDD1A	A	-16.078	-26.507	-24.599
ANKDD1B	A	-35.452	-40.031	-46.568
ANKEF1	A	-39.093	-46.807	-40.327
ANKFN1	A	-24.396	-30.665	-35.214
ANKFY1	A	-29.676	-38.562	-39.777
ANKH	A	-32.532	-31.513	-37.499
ANKHD1	A	-20.167	-35.272	-38.632
ANKIB1	A	-17.111	-28.857	-50.252
ANKK1	A	-25.759	-35.709	-38.277
ANKLE1	A	-22.44	-44.663	-46.198
ANKLE2	A	28.497	15.741	14.64
ANKMY1	A	-25.849	-37.658	-36.387
ANKMY2	A	-24.399	-42.173	-50.492
ANKRA2	A	-23.207	-37.226	-34.949
ANKRD1	A	-31.687	-41.518	-44.158
ANKRD10	A	-36.815	-51.445	-50.798
ANKRD11	A	-10.533	-2.946	0.978
ANKRD12	A	-37.439	-45.289	-46.415
ANKRD13A	A	-34.356	-31.048	-38.611
ANKRD13B	A	-23.183	-31.176	-26.82
ANKRD13C	A	-16.13	-23.592	-35.066
ANKRD13D	A	-33.745	-42.006	-34.908
ANKRD16	A	-18.416	-29.576	-41.354
ANKRD17	A	-6.228	-10.705	-9.248
ANKRD18A	A	-14.932	-24.197	-33.107
ANKRD18B	A	-9.066	-21.755	-18.795
ANKRD2	A	-29.004	-45.733	-40.691
ANKRD22	A	-38.869	-39.529	-32.09
ANKRD23	A	-18.973	-18.977	-21.414
ANKRD24	A	-20.774	-24.556	-31.524
ANKRD26	A	-29.88	-32.534	-48.3
ANKRD27	A	-31.385	-19.099	-26.373
ANKRD28	A	-36.814	-35.158	-33.324
ANKRD29	A	-35.88	-50.479	-54.095
ANKRD30A	A	-37.652	-41.334	-43.376
ANKRD30B	A	-42.009	-33.879	-55.873
ANKRD31	A	-26.198	-49.325	-41.844
ANKRD33	A	-21.528	-23.655	-25.936
ANKRD33B	A	-21.015	-39.129	-27.285
ANKRD34A	A	-32.551	-20.066	-16.887
ANKRD34B	A	-30.43	-33.874	-40.431
ANKRD34C	A	-10.114	-8.796	-14.353
ANKRD35	A	-32.792	-31.551	-26.722
ANKRD36	A	-2.371	-7.256	-1.014
ANKRD36B	A	-17.7	-27.534	-31.448
ANKRD36C	A		-17.529	-11.028
ANKRD36C	A	8.608
ANKRD37	A	-44.57	-37.812	-44.735
ANKRD39	A	-35.624	-30.893	-45.323
ANKRD40	A	-16.659	-31.592	-39.989
ANKRD42	A	-24.958	-33.73	-23.446
ANKRD44	A	-38.374	-45.342	-45.2
ANKRD45	A	-31.394	-37.555	-39.996
ANKRD46	A	-37.946	-45.148	-47.598
ANKRD49	A	20.564	23.024	19.525
ANKRD50	A	-21.798	-42.312	-30.197
ANKRD52	A		-4.576	-4.58
ANKRD52	A	10.591
ANKRD53	A	-27.605	-37.214	-22.834
ANKRD54	A	-29.96	-34.128	-33.464
ANKRD55	A	-28.976	-42.33	-43.982
ANKRD6	A	-22.627	-41.828	-42.85
ANKRD60	A	-39.738	-40.772	-40.965
ANKRD61	A	-38.283	-47.973	-50.48
ANKRD62	A	-38.377	-37.71	-48.372
ANKRD63	A	-29.125	-40.497	-39.009
ANKRD65	A	-44.953	-44.791	-57.029
ANKRD66	A	-38.561	-46.696	-42.288
ANKRD7	A	-33.099	-40.945	-49.966
ANKRD9	A	-12.945	-28.319	-51.805
ANKS1A	A	-21.167	-39.279	-41.458
ANKS1B	A	-31.424	-41.585	-52.423
ANKS3	A	-31.728	-41.961	-33.07
ANKS4B	A	-32.941	-49.006	-41.004
ANKS6	A	-27.568	-41.056	-46.822
ANKUB1	A	-25.814	-39.549	-50.575
ANKZF1	A	-44.159	-37.278	-43.204
ANLN	A		3.956
ANLN	A	18.622		6.365
ANO1	A	-22.438	-40.506	-44.082
ANO10	A	-21.59	-37.762	-43.803
ANO2	A	-32.301	-49.102	-52.979
ANO3	A	-27.04	-42.132	-36.453
ANO4	A	-40.026	-40.947	-45.428
ANO5	A	-40.074	-41.808	-45.104
ANO6	A	-23.766	-40.114	-38.726
ANO7	A	-46.61	-37.66	-47.502
ANO8	A	-24.315	-40.293	-28.106
ANO9	A	-21.826	-31.83	-32.026
ANOS1	A	-32.59	-31.832	-51.599
ANP32A	A	-6.485	-15.117	-29.541
ANP32B	A	-21.375	-21.291	-25.146
ANP32D	A	-43.071	-43.827	-37.358
ANP32E	A	-33.449	-46.135	-20.788
ANPEP	A	-30.038	-47.267	-50.189
ANTXR1	A	-25.954	-43.067	-54.115
ANTXR2	A	-24.56	-44.355	-53.341
ANTXRL	A	-31.09	-38.011	-42.172
ANXA1	A	-25.63	-42.489	-45.565
ANXA10	A	-38.789	-45.468	-39.493
ANXA11	A	-23.336	-28.159	-22.325
ANXA13	A	-43.993	-49.971	-47.018
ANXA2	A	-27.755	-32.689	-32.782
ANXA2R	A	-19.141	-38.878	-31.387
ANXA3	A	-41.142	-45.307	-48.555
ANXA4	A	-18.994	-47.945	-37.683
ANXA5	A	-44.425	-45.613	-52.156
ANXA6	A	-38.62	-38.207	-35.306
ANXA7	A	-9.13	-22.925	-9.909
ANXA8	A	-15.122	-16.135	-19.152
ANXA8L1	A	-26.018	-37.165	-38.125
ANXA9	A	-27.933	-31.893	-29.889
AOAH	A	-26.714	-25.717	-26.528
AOC1	A	-18.6	-23.597	-35.032
AOC2	A	-9.167	-15.886	-26.635
AOC3	A	-13.325	-33.849	-32.148
AOX1	A	-42.403	-48.863	-47.061
AP1AR	A	-25.057	-35.599	-35.445
AP1B1	A	-17.09	-33.407	-33.325
AP1G1	A	-29.883	-27.1	-23.178
AP1G2	A	-23.644	-27.96	-36.705
AP1M1	A	-4.308	-7.893	-21.908
AP1M2	A	-20.54	-30.133	-46.744
AP1S1	A	-17.378	-32.16	-35.771
AP1S2	A	-16.27	-46.434	-31.793
AP1S3	A	-35.774	-44.182	-47.912
AP2A1	A	-13.74	-20.032	-7.297
AP2A2	A	-27.935	-38.637	-50.71
AP2B1	A	-3.457	-22.728	-19.821
AP2M1	A	28.199	23.6	24.143
AP2S1	A	29.865	24.061	26.523
AP3B1	A	-9.004	-43.602	-14.454
AP3B2	A	-2.783	-24.919	-17.241
AP3D1	A	-29.786	-33.981	-35
AP3M1	A	-20.439	-40.192	-33.845
AP3M2	A	-31.071	-35.747	-40.998
AP3S1	A	-13.544	-25.222	-29.526
AP4B1	A	-26.318	-45.312	-34.557
AP4E1	A	-42.59	-41.797	-52.8
AP4M1	A	-33.038	-40.115	-34.405
AP4S1	A	-28.889	-35.877	-22.785
AP5B1	A	-11.112	-12.933	-21.629
AP5M1	A	-28.113	-39.742	-38.88
AP5S1	A	-36.62	-43.526	-38.863
AP5Z1	A	-25.722	-33.947	-23.694
APAF1	A	-40.572	-49.139	-50.154
APBA1	A	-37.947	-44.085	-38
APBA2	A	-34.405	-34.604	-42.918
APBA3	A	-26.521	-35.899	-36.378
APBB1	A	-37.751	-40.665	-47.724
APBB1IP	A	-33.488	-51.803	-49.942
APBB2	A	-21.642	-35.132	-19.295
APBB3	A	-19.036	-40.125	-40.651
APC	A	-22.62	-30.805	-26.592
APC2	A	-36.196	-32.512	-34.108
APCDD1	A	-18.365	-29.193	-27.308
APCDD1L	A	-34.85	-44.876	-36.446
APCS	A	-40.643	-39.71	-35.851
APEH	A	-16.955	-28.447	-39.056
APEX1	A	-5.883	-3.68	-31.96
APEX2	A	19.809	25.654	15.181
APH1A	A	-23.399	-46.672	-39.163
APH1B	A	-20.475	-40.554	-23.158
API5	A	-11.1		1.293
API5	A		8.078
APIP	A	-23.818	-26.769	-43.942
APLF	A	-29.676	-38.773	-37.211
APLN	A	-25.756	-36.95	-40.792
APLNR	A	-23.35	-36.182	-38.592
APLP1	A	-1.653	-5.71	-7.387
APLP2	A	-43.863	-47.893	-52.992
APMAP	A	-24.024	-30.503	-31.692
APOA1	A	-39.06	-45.936	-51.908
APOA2	A	-31.524	-29.884	-24.371
APOA4	A	-12.054	-25.024	-28.087
APOA5	A	-36.868	-40.419	-44.321
APOB	A	-25.856	-32.049	-41.448
APOBEC1	A	-11.648	-31.732	-19
APOBEC2	A	-39.547	-33.375	-33.702
APOBEC3A	A	-34.403	-40.875	-41.443
APOBEC3B	A	-50.502	-51.564	-51.518
APOBEC3C	A	-30.653	-31.734	-40.874
APOBEC3F	A	-43.783	-45.998	-42.497
APOBEC3G	A	-27.622	-33.005	-51.643
APOBEC3H	A	-38.342	-43.622	-48.186
APOBEC4	A	-36.271	-35.961	-49.508
APOBR	A	-5.726	-6.506	-12.595
APOC1	A	-19.11	-13.933	-26.9
APOC3	A	-38.039	-42.979	-42.527
APOD	A	-38.429	-52.639	-48.551
APOE	A	-24.672	-46.017	-33.256
APOF	A	-10.023	-42.58	-30.947
APOH	A	-25.044	-33.023	-33.464
APOL1	A	-36.566	-42.048	-36.713
APOL2	A	-36.504	-49.087	-49.879
APOL3	A	-39.892	-39.021	-45.56
APOL4	A	-28.625	-40.513	-47.581
APOL5	A	-40.915	-48.619	-52.714
APOL6	A	-0.546	-16.825	-26.594
APOLD1	A	-25.159	-46.019	-17.132
APOM	A	-26.216	-40.523	-32.386
APOO	A	-26.77	-43.007	-51.992
APOOL	A	-22.026	-41.464	-53.723
APP	A	-18.205	-46.17	-42.957
APPBP2	A	-33.085	-49.309	-53.944
APPL1	A	-38.333	-47.317	-34.082
APPL2	A	-24.879	-35.121	-38.927
APRT	A	-12.077	-19.865	-22.276
APTX	A	-27.713	-26.816	-28.044
AQP1	A	-44.362	-51.089	-52.941
AQP10	A	-35.126	-29.634	-27.362
AQP11	A	-27.6	-40.125	-22.917
AQP12A	A	-28.869	-38.402	-38.147
AQP12B	A	-34.692	-25.562	-33.612
AQP2	A	-25.651	-42.235	-40.433
AQP3	A	-36.323	-39.367	-43.241
AQP4	A	-41.148	-47.481	-54.663
AQP5	A	-21.784	-33.21	-37.959
AQP6	A	-27.237	-33.279	-36.32
AQP7	A	-3.273	-19.741	-9.306
AQP8	A	-12.97	-23.644	-30.389
AQP9	A	-27.865	-48.052	-36.451
AQR	A	33.653	26.415	16.081
AR	A	-41.125	-45.723	-54.675
ARAF	A	-34.082	-31.279	-47.695
ARAP1	A	-29.451	-38.927	-35.139
ARAP2	A	-29.185	-42.437	-49.82
ARAP3	A	-22.366	-39.153	-43.852
ARC	A	-36.268	-34.934	-43.745
ARCN1	A		3.949
ARCN1	A	26.105		7.072
AREG	A	-39.054	-43.536	-40.849
AREL1	A	-13.96	-31.176	-32.571
ARF1	A			0.014
ARF1	A	20.015	11.57
ARF4	A	-13.51		-2.428
ARF4	A		10.215
ARF5	A	-15.987	-36.964	-47.178
ARF6	A	-17.759	-30.06	-10.883
ARFGAP1	A	-22.978	-34.069	-41.257
ARFGAP2	A	-10.227	-38.208	-35.675
ARFGAP3	A	-43.422	-41.515	-54.114
ARFGEF1	A	-27.348	-18.264	-33.389
ARFGEF2	A	-26.517	-37.335	-39.688
ARFGEF3	A	-44.186	-46.875	-52.676
ARFIP1	A	-17.788	-40.718	-48.33
ARFIP2	A	-29.632	-38.106	-29.098
ARFRP1	A	25.172	19.1	18.492
ARG1	A	-28.267	-40.277	-46.921
ARG2	A	-33.509	-42.839	-48.749
ARGFX	A	-36.424	-30.33	-37.039
ARGLU1	A		-2.953	-19.521
ARGLU1	A	19.064
ARHGAP1	A	-11.645	-17.135	-21.465
ARHGAP10	A	-24.88	-29.902	-26.434
ARHGAP11A	A	-0.164	-9.685	-28.77
ARHGAP11B	A	-15.081	-29.557	-27.307
ARHGAP12	A	-33.587	-43.822	-46.615
ARHGAP15	A	-11.104	-30.717	-34.401
ARHGAP17	A	-21.21	-36.215	-22.232
ARHGAP18	A	-30.465	-32.843	-35.122
ARHGAP20	A	-38.693	-42.806	-47.238
ARHGAP21	A	-28.837	-32.582	-33.341
ARHGAP22	A	-19.934	-28.575	-16.617
ARHGAP23	A	-7.597	-18.793	-28.668
ARHGAP24	A	-39.512	-47.338	-43.453
ARHGAP25	A	-37.807	-40.908	-43.919
ARHGAP26	A	-20.626	-40.269	-41.776
ARHGAP27	A	-24.628	-43.803	-26.975
ARHGAP28	A	-42.321	-50.988	-50.624
ARHGAP29	A	-26.854	-29.57	-21.852
ARHGAP30	A	-29.388	-26.035	-24.716
ARHGAP31	A	-27.373	-46.743	-52.615
ARHGAP32	A	-25.105	-42.107	-45.56
ARHGAP33	A	-18.286	-38.23	-32.382
ARHGAP35	A	-32.016	-31.494	-39.328
ARHGAP36	A	-39.539	-51.623	-44.831
ARHGAP39	A	-32.459	-36.858	-34.528
ARHGAP4	A	-34.858	-39.136	-50.845
ARHGAP40	A	-24.901	-12.246	-35.614
ARHGAP42	A	-24.006	-23.11	-36.17
ARHGAP44	A	-5.369	-30.17	-22.724
ARHGAP45	A	-29.342	-35.798	-47.685
ARHGAP5	A	-23.699	-36.581	-46.934
ARHGAP6	A	-38.411	-45.515	-46.966
ARHGAP8	A	-35.441	-47.451	-51.199
ARHGAP9	A	-22.135	-33.008	-33.054
ARHGDIA	A	-21.855	-19.754	-40.371
ARHGDIB	A	-27.806	-47.816	-41.875
ARHGDIG	A	-24.068	-31.162	-41.226
ARHGEF1	A	-30.646	-40.736	-42.275
ARHGEF10	A	-43.662	-53.264	-56.475
ARHGEF10L	A	-19.234	-21.776	-23.832
ARHGEF11	A	-22.881	-34.394	-34.446
ARHGEF12	A	-35.67	-42.383	-47.125
ARHGEF15	A	-17.113	-38.999	-39.756
ARHGEF16	A	-36.608	-47.328	-32.033
ARHGEF17	A	-15.446	-31.649	-23.715
ARHGEF19	A	-23.56	-20.432	-33.927
ARHGEF2	A	-34.187	-36.091	-32.608
ARHGEF25	A	-19.635	-33.752	-28.057
ARHGEF26	A	-34.449	-22.576	-39.493
ARHGEF28	A	-23.713	-38.172	-49.611
ARHGEF3	A	-39.144	-43.338	-46.881
ARHGEF33	A	-15.655	-26.144	-18.946
ARHGEF35	A	-32.583	-33.507	-42.615
ARHGEF37	A	-35.215	-37.175	-39.49
ARHGEF38	A	-27.584	-40.398	-34.365
ARHGEF39	A	-33.01	-33.15	-34.098
ARHGEF4	A	-17.953	-33.511	-30.336
ARHGEF40	A	-21.74	-31.789	-34.664
ARHGEF5	A	-37.76	-44.215	-45.044
ARHGEF6	A	-38.476	-49.014	-53.09
ARHGEF7	A	-47.754	-54.572	-53.904
ARHGEF9	A	-32.369	-48.603	-45.676
ARID1A	A	-22.242	-29.091	-43.48
ARID1B	A	-28.329	-34.166	-35.137
ARID2	A		-9.903	-13.714
ARID2	A	10.457
ARID3A	A	-5.771	-10.065	-15.136
ARID3B	A	14.451	22.191	21.539
ARID3C	A	-4.366	-11.588	-13.432
ARID4A	A	-32.823	-53.617	-47.969
ARID4B	A	-22.536	-23.361	-26.318
ARID5A	A	-14.755	-15.912	-22.796
ARID5B	A	-23.276	-34.38	-23.295
ARIH1	A	20.709	21.078	25.389
ARIH2	A	-34.181	-50.547	-38.828
ARIH2OS	A	-10.007	-30.652	-19.891
ARL1	A	-22.02	-44.521	-35.617
ARL10	A	-9.947	-18.963	-12.924
ARL11	A	-20.542	-26.54	-23.721
ARL13A	A	-46.273	-44.446	-43.816
ARL13B	A	-27.464	-38.762	-40.79
ARL14	A	-39.396	-36.299	-49.822
ARL14EP	A	-39.865	-44.323	-28.092
ARL15	A	-39.078	-36.653	-42.434
ARL16	A	-23.941	-17.98	-27.183
ARL2BP	A	-21.076	-27.737	-26.824
ARL3	A	-24.715	-29.503	-34.119
ARL4A	A	-0.317	-2.827	-30.9
ARL4C	A	-31.408	-41.194	-49.011
ARL4D	A	-13.692	-26.934	-17.236
ARL5A	A	-22.6	-29.202	-37.683
ARL5B	A	-38.824	-42.111	-46.467
ARL5C	A	-34.736	-40.751	-29.522
ARL6	A	-31.967	-45.781	-44.907
ARL6IP4	A	-18.769	-23.438	-33.541
ARL6IP5	A	-23.021	-42.998	-50.225
ARL6IP6	A	-18.407	-27.143	-22.178
ARL8A	A	-31.578	-44.809	-46.701
ARL8B	A	-20.49	-35.074	-27.732
ARL9	A	-17.538	-31.477	-31.884
ARMC1	A	-16.499	-27.122	-45.16
ARMC10	A	-27.563	-29.585	-12.256
ARMC12	A	-26.941	-45.81	-41.385
ARMC2	A	-29.153	-38.289	-36.788
ARMC3	A	-42.404	-32.37	-51.419
ARMC4	A	-42.34	-39.995	-34.558
ARMC5	A	-12.323	-23.803	-10.103
ARMC6	A	-27.886	-31.227	-32.893
ARMC7	A	27.447	24.616	20.014
ARMC8	A	-32.123	-46.216	-47.336
ARMC9	A	-46.578	-46.527	-51.864
ARMCX1	A	-34.738	-46.245	-30.667
ARMCX2	A	-44.638	-52.139	-55.137
ARMCX3	A	-29.502	-45.414	-46.332
ARMCX4	A	-39.212	-50.178	-55.574
ARMCX5	A	-31.873	-40.675	-47.7
ARMCX6	A	-21.669	-27.705	-25.689
ARMS2	A	-33.525	-46.671	-49.295
ARMT1	A	-35.757	-45.423	-53.024
ARNT	A	-14.995	-28.853	-18.631
ARNT2	A	-41.594	-42.684	-49.07
ARNTL	A	-43.336	-40.493	-46.919
ARNTL2	A	-18.288	-24.03	-31.082
ARPC1A	A	-22.994	-15.918	-37.267
ARPC1B	A	-12.241	-30.773	-23.567
ARPC2	A		5.189
ARPC2	A	9.543		9.061
ARPC3	A	11.184	23.488	24.305
ARPC5	A	-5.042	-25.69	-34.904
ARPC5L	A	-26.534	-32.041	-35.23
ARPIN	A	-42.208	-45.716	-54.038
ARPP19	A	-19.959	-19.359	-32.446
ARPP21	A	-43.649	-41.04	-46.468
ARR3	A	-41.963	-49.471	-44.593
ARRB1	A	-25.507	-39.763	-39.23
ARRB2	A	-30.129	-34.313	-38.284
ARRDC1	A	-30.782	-47.303	-46.985
ARRDC2	A	-21.864	-40.465	-42.824
ARRDC3	A	-28.229	-33.931	-39.165
ARRDC4	A	-48.094	-50.803	-50.443
ARRDC5	A	-43.359	-41.946	-38.577
ARSA	A	-20.15	-37.945	-29.735
ARSB	A	-5.529	-19.121	-35.193
ARSD	A	-40.82	-41.879	-51.409
ARSE	A	-36.759	-35.296	-46.504
ARSF	A	-47.346	-51.822	-57.792
ARSG	A	-37.865	-51.779	-48.509
ARSH	A	-44.234	-38.228	-51.337
ARSI	A	-38.686	-45.834	-36.992
ARSJ	A	-26.02	-30.689	-31.935
ARSK	A	-24.753	-39.597	-40.418
ART1	A	-34.811	-19.902	-40.297
ART3	A	-22.384	-39.114	-31.693
ART4	A	-33.263	-43.809	-44.5
ART5	A	-23.348	-39.582	-44.245
ARTN	A	-21.612	-33.193	-28.996
ARV1	A	-32.697	-39.72	-35.397
ARVCF	A	-17.589	-18.263	-16.549
ARX	A	-35.876	-47.546	-54.922
AS3MT	A	-34.059	-39.685	-35.872
ASAH1	A	-36.866	-49.242	-48.247
ASAH2	A	-37.007	-41.051	-44.29
ASAH2B	A	-32.953	-43.066	-39.054
ASAP1	A	-43.152	-54.069	-52.637
ASAP2	A	-41.348	-51.801	-54.5
ASAP3	A	-11.347	-40.101	-35.87
ASB1	A	-31.205	-53.348	-55.527
ASB10	A	-40.981	-49.533	-47.16
ASB11	A	-31.926	-35.645	-34.579
ASB12	A	-30.583	-46.879	-39.028
ASB13	A	-26.307	-28.302	-45.045
ASB14	A	-21.254	-22.117	-24.966
ASB15	A	-45.491	-46.396	-53.533
ASB16	A	-9.112	-31.908	-1.083
ASB17	A	-30.885	-48.171	-43.451
ASB18	A	-36.568	-34.324	-48.978
ASB2	A	-34.641	-46.414	-36.08
ASB3	A	-24.505	-48.627	-41.527
ASB4	A	-28.291	-48.507	-55.23
ASB5	A	-43.517	-42.474	-55.547
ASB6	A	-26.499	-40.695	-34.123
ASB7	A	-43.636	-37.404	-41.552
ASB8	A	-20.092	-37.356	-19.531
ASB9	A	-39.746	-46.492	-52.242
ASCC1	A	-28.607	-45.408	-33.61
ASCC2	A	-36.503	-34.086	-15.035
ASCC3	A		5.403	-0.78
ASCC3	A	17.041
ASCL1	A	-40.923	-42.352	-44.353
ASCL2	A	-36.835	-50.63	-50.155
ASCL3	A	-10.31	-23.2	-25.498
ASCL4	A	-30.602	-43.617	-48.647
ASCL5	A	-38.602	-39.339	-41.953
ASF1A	A	-38.08	-49.38	-45.502
ASF1B	A	-37.664	-44.745	-41.923
ASGR1	A	-39.964	-42.298	-40.269
ASGR2	A	-36.722	-47.059	-48.856
ASH1L	A	-24.403	-27.672	-37.54
ASH2L	A	27.243	24.445	26.364
ASIC1	A	-23.714	-34.784	-31.258
ASIC2	A	-22.95	-27.558	-31.896
ASIC3	A	-23.526	-50.098	-50.938
ASIC4	A	-38.848	-46.062	-42.544
ASIC5	A	-45.595	-44.895	-52.88
ASIP	A	-23.423	-36.944	-24.839
ASL	A	-33.408	-32.408	-29.166
ASMT	A	-37.324	-46.623	-56.352
ASMTL	A	-42.635	-45.018	-36.596
ASNA1	A	16.497	26.446	25.518
ASNS	A	-36.188	-48.859	-53.676
ASNSD1	A	-24.923	-30.438	-27.404
ASPA	A	-33.257	-47.8	-46.059
ASPDH	A	-30.274	-37.146	-38.626
ASPG	A	-37.287	-39.601	-46.45
ASPH	A	-23.264	-35.943	-27.289
ASPHD1	A	-13.326	-47.534	-27.639
ASPHD2	A	-16.236	-16.346	-46.42
ASPM	A	-21.935	-25.22	-28.449
ASPN	A	-30.096	-47.584	-51.376
ASPRV1	A	-25.144	-32.033	-17.298
ASPSCR1	A	-31.94	-29.934	-29.715
ASRGL1	A	-11.102	-48.274	-42.223
ASS1	A	-29.821	-40.009	-44.672
ASTE1	A	-21.973	-30.651	-33.833
ASTL	A	-25.533	-32.089	-33.774
ASTN1	A	-24.415	-40.213	-27.627
ASTN2	A	-33.776	-48.024	-41.813
ASXL1	A	-25.519	-30.025	-37.359
ASXL2	A	-17.496	-4.116	-22.56
ASXL3	A	-35.896	-48.764	-47.879
ASZ1	A	-29.594	-40.702	-33.995
ATAD1	A	-23.655	-40.739	-34.046
ATAD2	A	-20.323	-31.706	-42.02
ATAD2B	A	-15.251	-30.901	-36.05
ATAD3A	A	-24.876	-11.25	-31.254
ATAD3B	A		-3.389	-8.03
ATAD3B	A	7.815
ATAD3C	A	-23.034	-31.816	-55.178
ATAD5	A		5.974
ATAD5	A	24.43		7.844
ATAT1	A	-21.635	-42.818	-49.604
ATCAY	A	-27.867	-44.132	-40.425
ATE1	A	-43.443	-45.565	-47.21
ATF1	A	-22.512	-24.013	-38.146
ATF2	A	-39.101	-42.685	-46.501
ATF3	A	-32.942	-33.21	-29.013
ATF4	A	-2.152	-14.428	-18.304
ATF5	A	-13.705	-25.03	-23.063
ATF6	A	-35.887	-34.032	-39.983
ATF6B	A	-36.55	-36.052	-38.45
ATF7IP	A	-40.477	-52.934	-48.886
ATF7IP2	A	-22.764	-46.209	-43.073
ATG10	A	-22.825	-35.914	-29.73
ATG101	A	3.614	-32.099	-28.259
ATG12	A	-27.186	-31.822	-37.561
ATG13	A	-12.302	-17.131	-5.832
ATG14	A	-11.304	-20.876	-24.665
ATG16L1	A	-40.306	-48.809	-50.09
ATG16L2	A	-29.69	-33.428	-31.816
ATG2A	A	-15.933	-38.1	-28.804
ATG2B	A	-38.35	-38.459	-51.788
ATG3	A	-33.301	-40.756	-35.465
ATG4A	A	-33.206	-45.514	-52.557
ATG4B	A	-43.826	-47.291	-55.153
ATG4C	A	-17.535	-32.415	-33.184
ATG4D	A	-14.885	-13.008	-24.632
ATG5	A	-30.57	-48.461	-42.811
ATG7	A	-24.23	-40.782	-37.051
ATG9A	A	-12.712	-16.011	-8.807
ATG9B	A	-6.234	-33.306	-33.069
ATIC	A	25.9	26.466	26.511
ATL1	A	-4.687	-20.481	-16.857
ATL2	A	19.788	17.916	25.09
ATL3	A	-15.079	-30.777	-32.086
ATM	A			4.877
ATM	A	9.443	9.591
ATMIN	A	-18.449	-38.669	-22.362
ATN1	A	-10.198	-24.492	-28.407
ATOH1	A	-40.391	-40.424	-47.27
ATOH7	A	-23.996	-27.077	-36.034
ATOH8	A	-28.128	-42.899	-47.867
ATOX1	A	-40.782	-49.547	-54.115
ATP10A	A	-25.98	-37.915	-52.26
ATP10B	A	-44.997	-48.835	-49.252
ATP10D	A	-27.64	-37.696	-33.45
ATP11A	A	-40.722	-51.05	-53.358
ATP11B	A	-25.704	-42.259	-52.035
ATP11C	A	-23.593	-44.922	-36.936
ATP12A	A	-30.989	-34.89	-41.072
ATP13A1	A	-2.461	-7.231	1.081
ATP13A2	A	-32.47	-53.053	-52.333
ATP13A3	A	-37.812	-40.174	-41.764
ATP13A4	A	-35.646	-49.74	-47.326
ATP13A5	A	-41.78	-52.026	-56.631
ATP1A1	A	18.169	11.456	7.793
ATP1A2	A	-31.294	-21.349	-23.498
ATP1A3	A	-21.085	-41.017	-26.228
ATP1A4	A	-36.721	-43.965	-40.699
ATP1B1	A	-42.279	-39.171	-43.85
ATP1B2	A	-28.8	-40.42	-44.332
ATP1B3	A	-19.766	-35.038	-38.504
ATP1B4	A	-37.456	-41.946	-53.709
ATP23	A	-9.036	-17.802	-34.339
ATP2A1	A	-14.204	-37.359	-25.76
ATP2A2	A	28.952	25.501	26.33
ATP2A3	A	-24.476	-22.437	-32.597
ATP2B1	A	-42.277	-48.128	-30.374
ATP2B2	A	-39.44	-47.179	-33.62
ATP2B3	A	-38.589	-39.715	-44.24
ATP2B4	A	-37.5	-31.562	-49.348
ATP2C1	A	-21.684	-44.683	-16.79
ATP2C2	A	-45.602	-41.132	-37.415
ATP4A	A	-32.465	-29.439	-39.566
ATP4B	A	-38.123	-48.937	-45.058
ATP5A1	A	33.48	26.375	23.597
ATP5B	A	29.773	24.119	20.441
ATP5C1	A	26.19	24.145	17.873
ATP5D	A	35.143	23.856	24.97
ATP5E	A	17.435	18.745	26.15
ATP5F1	A	21.652	19.489	12.406
ATP5G1	A	-14.937	-26.272	-33.904
ATP5G2	A	-25.433	-27.99	-20.221
ATP5G3	A	-33.143	-41.821	-44.571
ATP5H	A	20.284	20.761	24.145
ATP5I	A	15.009	10.619	15.437
ATP5J	A	5.405
ATP5J	A		8.356	7.758
ATP5J2	A	26.423	18.231	13.584
ATP5J2-PTCD1	A	-7.013	-9.616	-9.759
ATP5L	A	11.896	19.317	13.584
ATP5L2	A	5.653	-1.776
ATP5L2	A			10.489
ATP5S	A	-17.736	-33.371	-30.043
ATP5SL	A	-22.052	-20.751	-35.554
ATP6AP1	A			5.913
ATP6AP1	A	26.081	20.7
ATP6AP1L	A	-40.071	-47.245	-35.47
ATP6AP2	A	19.7	24.993	23.651
ATP6V0A1	A	-24.796	-29.985	-31.112
ATP6V0A2	A	-23.768	-31.241	-40.762
ATP6V0A4	A	-25.956	-22.982	-35.618
ATP6V0B	A	34.249	24.11	25.338
ATP6V0C	A	33.626	26.51	26.527
ATP6V0D1	A	30.695	26.437	24.935
ATP6V0D2	A	-27.98	-40.341	-42.457
ATP6V0E1	A	-36.345	-44.591	-52.052
ATP6V0E2	A	-37.576	-35.759	-38.262
ATP6V1A	A	27.034	26.441	25.055
ATP6V1B1	A	-20.35	-39.239	-37.39
ATP6V1B2	A	18.152	21.634	15.376
ATP6V1C1	A	25.247	24.456	26.497
ATP6V1C2	A	-31.486	-40.333	-52.008
ATP6V1D	A	30.928	25.759	19.06
ATP6V1E1	A	32.904	19.317	22.667
ATP6V1E2	A	-34.481	-35.132	-46.079
ATP6V1F	A	22.62	24.569	22.597
ATP6V1G1	A	36.487	24.097	25.163
ATP6V1G2	A	-13.885	-39.426	-44.921
ATP6V1G3	A	-33.773	-43.942	-42.671
ATP6V1H	A	4.173		-0.78
ATP6V1H	A		6.541
ATP7A	A	-45.52	-51.106	-52.353
ATP7B	A	-38.181	-39.932	-45.75
ATP8A1	A	-19.028	-46.33	-43.674
ATP8A2	A	-26.512	-29.526	-38.391
ATP8B1	A	-42.412	-41.525	-42.616
ATP8B2	A	-28.423	-36.22	-39.738
ATP8B3	A	-8.277	-21.757	-17.031
ATP8B4	A	-31.425	-42.977	-46.458
ATP9A	A	-32.335	-37.653	-46.56
ATP9B	A	-34.35	-40.57	-54.727
ATPAF1	A	-11.382	-36.872	-36.367
ATPAF2	A	-3.559	-0.066	4.053
ATPIF1	A	-28.628	-36.906	-45.576
ATR	A	24.381	24.584	25.307
ATRAID	A	-31.525	-43.248	-47.061
ATRIP	A	16.907	25.774	22.035
ATRN	A	-20.788	-23.431	-30.193
ATRNL1	A	-39.693	-45.003	-46.214
ATRX	A	-35.586	-0.134	-0.584
ATXN1	A	-41.242	-36.044	-42.194
ATXN10	A		3.313
ATXN10	A	15.332		11.463
ATXN1L	A	-25.471	-39.81	-39.211
ATXN2	A	-12.116	-31.341	-33.793
ATXN2L	A	-1.125	-7.731	4.623
ATXN3	A	-36.387	-42.799	-53.882
ATXN3L	A	-38.221	-49.05	-38.566
ATXN7	A	-19.946	-29	-33.772
ATXN7L1	A	-33.718	-25.279	-23.047
ATXN7L2	A	-17.711	-36.228	-28.595
ATXN7L3	A	30.78	23.385	11.687
ATXN7L3B	A	-34.035	-48.554	-51.939
AUH	A	-26.806	-28.014	-29.938
AUNIP	A	-27.129	-39.995	-38.378
AUP1	A	-22.784	-22.503	-22.193
AURKA	A	31.104	23.781	25.365
AURKAIP1	A	14.614	12.429	15.709
AURKB	A	19.982	26.5	26.542
AURKC	A	-34.558	-45.402	-48.879
AUTS2	A	-35.345	-46.258	-30.237
AVEN	A	-25.1	-25.826	-33.763
AVIL	A	-17.032	-36.218	-31.663
AVL9	A	-17.895	-12.461	-34.413
AVP	A	-37.654	-42.574	-41.181
AVPI1	A	-18.804	-36.565	-41.352
AVPR1A	A	-12.575	-33.993	-27.367
AVPR1B	A	-18.303	-26.638	-30.374
AVPR2	A	-32.731	-36.489	-43.027
AWAT1	A	-38.763	-36.127	-51.063
AWAT2	A	-30.824	-44.44	-43.667
AXDND1	A	-25.015	-28.983	-31.475
AXIN1	A	-34.897	-52.792	-49.808
AXIN2	A	-29.507	-27.791	-29.579
AXL	A	-33.404	-44.621	-51.114
AZGP1	A	-27.003	-44.034	-49.224
AZI2	A	-25.054	-24.849	-46.067
AZIN1	A	-7.8		-7.171
AZIN1	A		13.581
AZIN2	A	-25.303	-44.848	-43.39
AZU1	A	-31.532	-42.579	-45.502
B2M	A	-38.683	-45.393	-50.017
B3GALNT1	A	-39.182	-37.918	-45.373
B3GALNT2	A	-16.013	-33.282	-44.309
B3GALT1	A	-32.709	-49.757	-46.626
B3GALT2	A	-32.58	-35.737	-50.292
B3GALT4	A	-11.292	-26.461	-37.551
B3GALT5	A	-25.659	-43.969	-50.793
B3GALT6	A	-26	-33.915	-20.621
B3GAT1	A	-45.946	-47.452	-48.926
B3GAT2	A	-33.337	-38.619	-39.444
B3GAT3	A	-21.7	-19.327	-7.154
B3GLCT	A	-29.125	-43.973	-45.035
B3GNT2	A	-27.857	-41.659	-32.351
B3GNT3	A	-9.227	-38.094	-35.043
B3GNT4	A		-8.686	5.711
B3GNT4	A	7.3
B3GNT5	A	-42.61	-44.328	-47.384
B3GNT6	A	-23.027	-42.842	-24.555
B3GNT7	A	-41.437	-43.929	-52.799
B3GNT8	A	-24.727	-36.973	-42.55
B3GNT9	A	-30.364	-23.265	-28.814
B3GNTL1	A	-36.849	-40.263	-43.851
B4GALNT1	A	-12.561	-22.107	-37.456
B4GALNT2	A	-19.982	-15.477	-24.558
B4GALNT3	A	-26.842	-33.958	-33.913
B4GALNT4	A	-33.139	-34.246	-38.223
B4GALT1	A	-24.594	-41.041	-40.609
B4GALT2	A	-23.819	-30.416	-11.376
B4GALT3	A	-26.489	-40.58	-13.239
B4GALT4	A	-30.15	-38.281	-31.004
B4GALT5	A	-33.029	-31.82	-42.48
B4GALT6	A	-30.576	-47.077	-47.243
B4GALT7	A	-41.047	-27.23	-35.027
B4GAT1	A	-13.19	-30.161	-37.901
B9D1	A	-25.847	-40.697	-39.773
B9D2	A	-35.257	-41.92	-45.521
BAALC	A	-28.186	-30.846	-33.721
BAAT	A	-40.182	-37.067	-17.708
BABAM1	A	-21.443	-7.184	-11.741
BACE1	A	-30.679	-37.323	-45.128
BACE2	A	-30.793	-37.583	-33.353
BACH1	A	-33.221	-28.401	-31.632
BACH2	A	-26.782	-24.648	-27.555
BAD	A	-8.601	-13.254	-16.985
BAG1	A	-15.216	-7.058	-22.915
BAG2	A	-4.533	-24.205	-21.692
BAG3	A	-28.823	-41.548	-39.758
BAG4	A	-20.295	-38.094	-19.477
BAG5	A	-37.708	-34.586	-50.414
BAG6	A	-16.985	-19.14	-13.88
BAHCC1	A	-35.689	-28.208	-32.705
BAHD1	A	-23.392	-44.428	-36.99
BAIAP2	A	-13.969	-29.631	-34.219
BAIAP2L1	A	-17.045	-20.918	-35.291
BAIAP2L2	A	-29.058	-45.508	-40.286
BAIAP3	A	-38.157	-39.843	-34.152
BAK1	A	-19.905	-24.958	-22.663
BAMBI	A	-33.31	-40.606	-45.141
BANF1	A	32.527	26.468	26.542
BANF2	A	-13.44	-19.487	-14.184
BANK1	A	-20.92	-36.184	-30.741
BANP	A		-9.28	2.117
BANP	A	7.443
BAP1	A	-0.332
BAP1	A		15.364	8.527
BARD1	A	27.235	11.514	11.478
BARHL1	A	-23.335	-36.141	-37.862
BARHL2	A	-23.824	-29.966	-44.429
BARX1	A	-18.938	-30.155	-28.87
BARX2	A	-41.848	-50.386	-48.355
BASP1	A	-23.388	-30.176	-47.043
BATF	A	-31.277	-44.627	-47.476
BATF2	A	-33.361	-31.565	-24.149
BATF3	A	-36.95	-43.048	-42.562
BAX	A	-37.145	-40.394	-38.744
BAZ1A	A	-24.646	-32.243	-20.415
BAZ1B	A		-5.464	-6.067
BAZ1B	A	7.155
BAZ2A	A	-7.958	-9.584	-23.747
BAZ2B	A	-37.471	-45.977	-37.257
BBC3	A	-39.436	-34.73	-49.443
BBIP1	A	-37.226	-49.934	-51.987
BBOF1	A	-31.526	-26.305	-38.222
BBOX1	A	-41.693	-30.226	-39.811
BBS1	A	-27.358	-42.401	-44.489
BBS10	A	-39.629	-47.949	-44.6
BBS12	A	-42.857	-43.111	-52.819
BBS2	A	-39.921	-46.94	-45.771
BBS4	A	-23.115	-25.435	-23.538
BBS7	A	-25.353	-35.748	-36.474
BBS9	A	-36.855	-47.214	-46.748
BBX	A	-43.348	-41.917	-48.43
BCAM	A	-22.562	-35.594	-38.493
BCAN	A	-29.8	-32.645	-33.367
BCAP29	A	-27.671	-39.547	-33.508
BCAP31	A	-29.41	-45.285	-43.474
BCAR1	A	-24.848	-21.006	-26.811
BCAR3	A	-15.192	-38.908	-38.836
BCAS1	A	-37.919	-46.694	-46.867
BCAS2	A	7.759	11.608	25.013
BCAS3	A	-31.756	-41.795	-46.697
BCAS4	A	-35.998	-48.821	-44.543
BCAT1	A	-15.83	-26.592	-15.258
BCAT2	A	-44.69	-40.31	-52.377
BCCIP	A	34.279	20.044	23.644
BCDIN3D	A	-22.052	-36.997	-27.223
BCHE	A	-32.919	-39.841	-45.439
BCKDHA	A	-31.619	-39.052	-39.09
BCKDHB	A	-23.631	-30.904	-29.896
BCKDK	A	-25.096	-22.771	-34.924
BCL10	A	-14.635	-42.903	-35.493
BCL11A	A	-29.089	-48.849	-45.689
BCL11B	A	-28.324	-29.177	-31.604
BCL2	A	-33.403	-44.929	-48.691
BCL2A1	A	-13.599	-40.23	-15.199
BCL2L1	A	-4.775	-19.81
BCL2L1	A			11.445
BCL2L10	A	-14.866	-31.545	-34.155
BCL2L11	A	-33.685	-41.534	-38.693
BCL2L12	A	-20.259	-40.934	-47.241
BCL2L13	A	-30.865	-34.345	-40.355
BCL2L14	A	-27.607	-31.138	-36.765
BCL2L15	A	-22.406	-34.561	-24.602
BCL2L2	A	-0.348	-25.171	-21.738
BCL3	A	-43.509	-43.107	-35.504
BCL6	A	-37.499	-24.587	-39.169
BCL6B	A	-21.004	-31.468	-30.323
BCL7A	A	-24.391	-45.477	-42.119
BCL7B	A	-37.7	-36.515	-47.516
BCL7C	A	2.704	-35.698	-23.367
BCL9	A	-28.651	-39.663	-30.043
BCL9L	A	-18.975	-24.978	-28.681
BCLAF1	A	-1.443
BCLAF1	A		12.649	6.467
BCO1	A	-32.472	-29.752	-32.977
BCO2	A	-43.205	-45.525	-52.71
BCOR	A	-34.223	-39.147	-48.884
BCORL1	A	-40.199	-50.148	-54.48
BCR	A	-27.057	-29.783	-29.635
BCS1L	A	19.895	25.531	26.117
BDH1	A	-20.059	-23.209	-22.435
BDH2	A	-5.429	-32.267	-24.919
BDKRB1	A	-44.98	-43.066	-46.361
BDNF	A	-30.14	-31.954	-37.861
BDP1	A	-7.482	1.414	-8.293
BEAN1	A	-10.639	-25.014	-29.833
BECN1	A	1.245	-0.242	5.904
BEGAIN	A	-47.592	-41.236	-50.22
BEND2	A	-48.542	-54.612	-56.704
BEND3	A	-8.614	3.479	-4.835
BEND4	A	-20.828	-26.926	-39.65
BEND5	A	-32.326	-42.007	-43.011
BEND6	A	-26.253	-35.976	-37.779
BEND7	A	-28.543	-46.893	-50.522
BEST1	A	-32.175	-40.987	-29.821
BEST2	A	-28.345	-32.097	-30.799
BEST3	A	-27.112	-46.353	-33.21
BEST4	A	-16.098	-42.258	-32.505
BET1	A			0.558
BET1	A	10.584	7.497
BET1L	A	-29.621	-40.71	-55.194
BEX1	A	-32.399	-42.403	-48.467
BEX2	A	-42.128	-43.936	-52.293
BEX3	A	-27.591	-36.893	-45.632
BEX4	A	-43.789	-45.435	-49.442
BEX5	A	-21.016	-44.61	-42.739
BFAR	A	-34.784	-45.01	-50.621
BFSP1	A	-35.624	-45.03	-47.417
BFSP2	A	-39.489	-49.562	-49.629
BGLAP	A	-34.3	-36.812	-36.728
BGN	A	-34.246	-44.468	-51.839
BHLHA15	A	-10.871	-18.67	-12.882
BHLHA9	A	-36.682	-43.43	-32.873
BHLHB9	A	-33.246	-41.989	-51.738
BHLHE22	A	-18.12	-48.589	-45.099
BHLHE23	A	-33.4	-34.547	-37.334
BHLHE40	A	-33.666	-43.823	-42.254
BHLHE41	A	-36.36	-42.365	-51.669
BHMT	A	-26.098	-39.127	-41.282
BHMT2	A	-26.996	-40.37	-45.17
BICC1	A	-24.753	-40.772	-40.545
BICD1	A	-26.915	-36.932	-43.159
BICD2	A	-21.821	-24.656	-38.723
BICDL1	A	-18.06	-35.495	-46.615
BICDL2	A	-12.648	-26.251	-33.716
BID	A	-0.67	-15.418	-12.09
BIK	A	-24.201	-34.969	-42.353
BIN1	A	-32.71	-43.656	-35.083
BIN2	A	-35.495	-47.506	-37.094
BIN3	A	-40.012	-43.744	-37.988
BIRC2	A	-39.995	-34.909	-33.794
BIRC3	A	-35.324	-37.593	-45.095
BIRC5	A	30.475	22.5	25.51
BIRC6	A	-28.048	-39.791	-35.659
BIRC7	A	-26.739	-44.296	-37.556
BIRC8	A	-33.177	-41.913	-53.828
BIVM	A	-32.586	-41.219	-53.942
BLACE	A	-41.416	-38.03	-47.088
BLCAP	A	-29.123	-36.408	-37.804
BLID	A	-42.203	-46.042	-54.405
BLK	A	-33.724	-37.767	-47.192
BLM	A	9.861	16.642	10.048
BLMH	A	-37.026	-35.491	-17.478
BLNK	A	-35.564	-36.166	-52.013
BLOC1S1	A	-9.857	-36.594	-40.15
BLOC1S2	A	-29.259	-34.184	-43.231
BLOC1S3	A	-28.086	-33.221	-37.058
BLOC1S4	A	-25.771	-42.246	-50.881
BLOC1S5	A	-30.955	-45.875	-47.102
BLOC1S6	A	-21.323	-43.702	-41.989
BLVRA	A	-36.419	-43.234	-38.237
BLVRB	A	-11.725	-43.419	-37.124
BLZF1	A	-33.132	-43.12	-45.954
BMF	A	-11.605	-17.155	-24.763
BMP1	A	-17.287	-24.134	-27.23
BMP10	A	-23.601	-37.791	-39.133
BMP15	A	-35.455	-46.204	-46.296
BMP2	A	-37.228	-35.41	-41.727
BMP2K	A	-20.264	-36.577	-31.984
BMP3	A	-31.394	-44.708	-49.324
BMP4	A	-40.535	-38.211	-47.719
BMP5	A	-47.507	-47.549	-45.999
BMP6	A	-42.956	-39.985	-55.095
BMP7	A	-27.299	-48.346	-38.98
BMP8A	A	-26.022	-38.094	-39.294
BMP8B	A	-12.685	-38.443	-29.73
BMPER	A	-45.285	-45.33	-54.385
BMPR1A	A	-21.232	-1.752	-26.809
BMPR1B	A	-39.695	-35.688	-41.195
BMPR2	A	-30.223	-48.477	-50.117
BMS1	A	13.729	16.663	7.83
BMT2	A	-25.938	-44.768	-28.109
BMX	A	-44.489	-42.804	-53.075
BNC1	A	-4.356	-28.006	-14.286
BNC2	A	-33.837	-27.003	-46.604
BNIP1	A	29.638	11.588	11.89
BNIP2	A	-43.201	-38.785	-43.308
BNIP3	A	-25.617	-29.721	-11.935
BNIP3L	A	-40.889	-51.327	-53.678
BNIPL	A	-31.139	-35.175	-42.988
BOC	A	-25.222	-40.192	-43.595
BOD1	A	-23.9	-43.149	-52.684
BOD1L1	A	4.01	-19.222	-14.756
BOD1L2	A	-46.52	-48.433	-57.06
BOK	A	-30.648	-44.899	-47.893
BOLA1	A	-18.433	-27.088	-25.448
BOLA2B	A			-3.413
BOLA2B	A	20.189	8.037
BOLA3	A	-0.972	-27.911	-18.041
BOLL	A	-26.992	-8.245	-9.538
BOP1	A		-3.38
BOP1	A	15.286		8.761
BORA	A	5.296	2.21	1.043
BORCS5	A	-19.397	-35.69	-42.833
BORCS6	A	-11.323	-14.795	-32.757
BORCS7	A	-19.699	-31.364	-28
BPGM	A	-36.571	-47.177	-42.368
BPHL	A	-41.271	-40.087	-48.376
BPI	A	-19.152	-28.695	-35.594
BPIFA1	A	-16.589	-31.103	-23.942
BPIFA2	A	-23.783	-28.884	-34.745
BPIFA3	A	-32.817	-37.393	-19.316
BPIFB1	A	-25.997	-42.808	-28.496
BPIFB2	A	-11.456	-30.02	-43.285
BPIFB3	A	-6.677	-27.848	-30.554
BPIFB4	A	-26.814	-30.984	-35.637
BPIFB6	A	-22.18	-33.488	-28.597
BPIFC	A	-30.223	-39.194	-43.231
BPNT1	A	-28.452	-48.656	-50.278
BPTF	A			1.775
BPTF	A	18.323	6.667
BPY2B	A	-43.54	-47.45	-56.411
BRAF	A	-44.541	-46.138	-54.265
BRAP	A	-39.439	-30.792	-35.113
BRAT1	A	21.623	24.699	26.007
BRCA1	A	22.055	22.074	21.729
BRCA2	A	-12.853
BRCA2	A		20.593	18.347
BRCC3	A	-40.097	-35.313	-30.776
BRD1	A	-30.908		4.087
BRD1	A		10.986
BRD2	A	-8.776	3.847	-14.41
BRD3	A	-31.743	-22.831	-29.362
BRD4	A	9.684	10.5	9.774
BRD7	A	-8.526	-28.065	-20.833
BRD8	A			5.362
BRD8	A	18.77	13.564
BRD9	A	-32.842	-41.431	-38.48
BRDT	A	-36.627	-34.285	-28.49
BRF1	A	33.312	25.295	25.227
BRF2	A	37.611	26.226	25.397
BRI3	A	-26.727	-43.851	-42.925
BRI3BP	A	-22.89	-37.794	-37.832
BRICD5	A	-24.948	-43.349	-43.427
BRINP1	A	-31.121	-32.355	-41.176
BRINP2	A	-35.653	-40.64	-45.426
BRINP3	A	-35.839	-51.052	-49.445
BRIP1	A		-2.875
BRIP1	A	18.298		12.402
BRIX1	A	30.99	23.55	24
BRK1	A	-8.118	-4.145	-10.953
BRMS1	A	-6.972	-4.589	-4.647
BRMS1L	A	-22.954	-39.68	-37.734
BROX	A	-27.952	-39.262	-38.537
BRPF1	A	-22.425	-32.93	-35.743
BRPF3	A	-38.077	-29.098	-36.039
BRS3	A	-44.081	-46.225	-54.615
BRSK1	A	-30.874	-33.911	-50.405
BRSK2	A	-31.959	-28.912	-41.435
BRWD1	A	-33.904	-36.868	-37.335
BRWD3	A	-38.496	-44.056	-42.686
BSCL2	A	-1.032	-38.162	-31.8
BSDC1	A	-17.777	-28.218	-26.377
BSG	A		-15.118	0.166
BSG	A	14.437
BSN	A	-21.267	-49.79	-44.166
BSND	A	-31.266	-41.648	-36.638
BSPH1	A	-24.338	-40.527	-31.037
BSPRY	A	-37.798	-47.972	-51.839
BST1	A	-26.734	-38.725	-37.705
BST2	A	-27.105	-50.865	-41.531
BSX	A	-45.313	-52.063	-52.011
BTAF1	A	-0.546	-16.998	-0.279
BTBD1	A	-11.578	-41.53	-36.88
BTBD10	A	-40.562	-48.755	-46.191
BTBD11	A	-30.626	-37.322	-37.972
BTBD16	A	-38.892	-50.765	-54.007
BTBD17	A	-39.326	-46.167	-47.019
BTBD18	A	-21.167	-50.594	-28.58
BTBD19	A	-32.646	-35.18	-38.852
BTBD2	A	-28.238	-46.571	-39.591
BTBD3	A	-37.893	-42.725	-51.177
BTBD6	A	-39.795	-47.975	-54.461
BTBD7	A	-40.589	-46.52	-50.789
BTBD9	A	-23.933	-22.03	-37.095
BTC	A	-33.328	-39.319	-48.025
BTD	A	-39.013	-33.535	-38.752
BTF3	A			4.179
BTF3	A	13.964	8.349
BTF3L4	A	-15.918	-11.897	-1.676
BTG1	A	-35.042	-39.789	-37.795
BTG2	A	-33.913	-46.905	-41.759
BTG3	A	-9.652	-45.019	-44.731
BTG4	A	-33.203	-48.015	-44.009
BTK	A	-24.579	-29.982	-26.077
BTLA	A	-45.215	-49.156	-53.6
BTN1A1	A	-29.133	-29.404	-44.696
BTN2A1	A	-42.819	-41.732	-44.54
BTN2A2	A		-15.167	-6.166
BTN2A2	A	6.329
BTN3A1	A	-16.973	-30.513	-23.88
BTN3A2	A	-26.436	-43.084	-42.162
BTN3A3	A	-28.363	-32.767	-45.988
BTNL2	A	-19.216	-23.855	-34.161
BTNL3	A	-41.747	-48.189	-52.548
BTNL8	A	-26.598	-44.729	-48.974
BTNL9	A	-42.511	-49.885	-48.64
BTRC	A	-32.532	-21.959	-33.864
BUB1	A		4.431
BUB1	A	9.186		9.164
BUB1B	A		-14.516	-4.256
BUB1B	A	6.278
BUB3	A	29.472	25.322	24.253
BUD13	A	5.181	-8.882	4.585
BUD31	A	31.891	23.722	26.519
BVES	A	-10.892	-32.634	-43.768
BYSL	A	33.103	26.49	26.555
BZW1	A	-22.441	-28.576	-36.695
BZW2	A	-34.888	-29.063	-41.409
C10orf10	A	-30.437	-34.173	-33.567
C10orf105	A	-20.211	-30.222	-20.702
C10orf107	A	-39.989	-37.676	-36.463
C10orf113	A	-26.638	-42.991	-52.629
C10orf120	A	-37.51	-49.393	-50.747
C10orf128	A	-31.017	-39.108	-38.53
C10orf142	A	-19.669	-30.819	-37.971
C10orf35	A	-16.098	-44.614	-34.104
C10orf53	A	-24.76	-29.965	-41.003
C10orf55	A	-5.438	-20.665	-17.987
C10orf62	A	-7.669	-31.099	-31.008
C10orf67	A	-29.946	-40.733	-24.474
C10orf71	A	-36.605	-36.824	-42.233
C10orf76	A	-21.396	-2.882	-8.612
C10orf82	A	-38.009	-45.858	-53.774
C10orf88	A	-26.674	-31.02	-30.6
C10orf90	A	-38.802	-44.312	-43.053
C10orf95	A	-24.25	-40.852	-23.838
C10orf99	A	-38.406	-43.559	-46.997
C11orf1	A	-38.151	-41.906	-43.731
C11orf16	A	-36.331	-27.343	-42.881
C11orf21	A	-25.279	-28.468	-29.608
C11orf24	A	-32.665	-40.23	-41.169
C11orf40	A	-32.807	-40.756	-52.243
C11orf42	A	-45.346	-49.99	-46.504
C11orf45	A	-41.114	-50.549	-53.916
C11orf49	A	-21.859	-25.497	-23.181
C11orf52	A	-38.564	-41.606	-44.048
C11orf53	A	-40.808	-44.036	-54.369
C11orf54	A	-46.461	-39	-51.449
C11orf57	A	-1.606	3.941	-10.505
C11orf58	A	-21.932	-42.696	-47.566
C11orf63	A	-38.298	-40.417	-34.229
C11orf65	A	-34.65	-34.308	-43.952
C11orf68	A	-29.343	-39.746	-29.59
C11orf70	A	-18.577	-38.428	-36.592
C11orf71	A	-35.78	-46.983	-54.633
C11orf74	A	-40.419	-46.981	-38.112
C11orf80	A	-25.99	-42.177	-48.954
C11orf84	A	-17.511	-10.889	-18.659
C11orf86	A	-20.145	-20.751	-23.153
C11orf87	A	-42.786	-52.335	-54.219
C11orf88	A	-31.766	-31.909	-51.219
C11orf91	A	-14.762	-24.216	-29.955
C11orf94	A	-8.828	-15.701	-18.565
C11orf95	A	-6.845	-23.758	-19.978
C11orf96	A	-37.466	-38.326	-22.426
C12orf10	A	-34.938	-45.629	-36.611
C12orf29	A	-29.428	-37.726	-41.236
C12orf4	A	-13.635	-38.534	-41.742
C12orf40	A	-18.595	-40.571	-42.821
C12orf42	A	-37.714	-36.705	-45.943
C12orf43	A	-15.236	-23.922	-17.043
C12orf45	A			1.949
C12orf45	A	6.036	12.949
C12orf49	A	-12.495	-49.548	-44.991
C12orf50	A	-20.962	-30.075	-32.074
C12orf54	A	-13.836	-39.252	-32.944
C12orf56	A	-16.766	-21.563	-18.084
C12orf57	A	-29.448	-37.437	-35.543
C12orf60	A	-41.01	-47.719	-50.098
C12orf65	A	-15.51	-26.296	-22.135
C12orf66	A	-42.416	-52.708	-51.647
C12orf71	A	-35.191	-37.338	-27.1
C12orf73	A	-13.861	-36.665	-46.701
C12orf75	A	-31.681	-40.055	-41.861
C12orf76	A	-18.689	-31.262	-38.109
C14orf1	A	-28.295	-39.13	-38.352
C14orf105	A	-19.282	-34.848	-26.695
C14orf119	A	-0.205	-32.048	-15.806
C14orf132	A	-38.489	-46.889	-52.156
C14orf159	A	-41.568	-46.53	-45.089
C14orf166	A			-6.17
C14orf166	A	6.241	22.274
C14orf177	A	-47.053	-49.615	-55.142
C14orf178	A		-6.192	-9.018
C14orf178	A	7.349
C14orf180	A	-45.872	-40.133	-52.452
C14orf2	A	-23.635	-29.383	-19.181
C14orf28	A	-16.688	-43.8	-27.886
C14orf37	A	-25.847	-35.981	-41.743
C14orf39	A	-41.25	-49.504	-43.083
C14orf79	A	-45.083	-48.252	-52.962
C14orf80	A	30.635	22.819	20.321
C14orf93	A	-30.411	-37.061	-37.895
C15orf39	A	-29.804	-22.733	-24.596
C15orf40	A	-24.268	-25.337	-17.824
C15orf41	A	26.085	13.682	16.975
C15orf48	A	-22.444	-28.313	-24.853
C15orf52	A	-18.089	-36.473	-31.668
C15orf53	A	-21.216	-30.496	-31.687
C15orf57	A	4.845
C15orf57	A		12.576	21.119
C15orf59	A	-13.303	-27.46	-26.89
C15orf61	A	-36.763	-28.574	-37.259
C15orf62	A	-21.836	-26.296	-25.7
C15orf65	A	-37.861	-46.862	-44.256
C16orf45	A	-26.524	-39.745	-40.788
C16orf46	A	-42.794	-43.188	-39.798
C16orf52	A	-22.973	-31.224	-37.994
C16orf54	A	-26.417	-42.866	-37.181
C16orf58	A	-37.719	-49.637	-43.499
C16orf59	A	27.641	26.458	22.345
C16orf62	A	-17.455	-33.83	-30.406
C16orf70	A	-34.227	-41.806	-33.227
C16orf71	A	-30.495	-29.501	-42.799
C16orf72	A	-20.171	-28.212	-11.937
C16orf74	A	-37.292	-44.313	-43.278
C16orf78	A	-39.853	-43.544	-41.057
C16orf86	A	-18.835	-13.961	-22.892
C16orf87	A	-35.369	-44.231	-43.582
C16orf89	A	-11.119	-14.12	-24.51
C16orf90	A	11.535	10.183	7.201
C16orf91	A	-10.106	-25.875	-28.668
C16orf92	A	-7.262	-4.841	-21.541
C16orf96	A	-26.96	-32.299	-33.721
C17orf100	A	-16.99	-31.444	-31.094
C17orf105	A	-18.627	-32.155	-28.936
C17orf107	A	-25.486	-32.511	-33.613
C17orf47	A	-9.022	-11.119	-22.215
C17orf50	A	-12.724	-8.357	-13.994
C17orf51	A	-24.904	-42.95	-41.754
C17orf53	A	-0.95	-8.725	-2.179
C17orf58	A	-3.192	-9.471	-16.461
C17orf62	A	-26.004	-25.196	-39.944
C17orf64	A	-38.139	-38.479	-41.001
C17orf67	A	-10.397	-28.905	-29.934
C17orf74	A	-17.827	-35.689	-25.019
C17orf75	A	-11.151	-33.215	-16.253
C17orf78	A	-40.807	-41.052	-43.006
C17orf80	A	-35.793	-47.945	-47.263
C17orf97	A	-25.936	-34.428	-42.706
C17orf98	A	-23.035	-34.719	-36.198
C17orf99	A	-32.187	-49.205	-51.517
C18orf21	A	7.709	18.865	13.946
C18orf25	A	-30.316	-38.523	-45.246
C18orf54	A	-45.454	-47.38	-48.926
C18orf63	A	-39.767	-50.195	-56.081
C18orf8	A	-35.171	-37.89	-31.61
C19orf12	A	-17.615	-29.718	-33.117
C19orf18	A	-17.595	-41.577	-28.289
C19orf24	A	-9.863	-42.228	-36.222
C19orf25	A	-21.337	-33.893	-32.646
C19orf33	A	-26.525	-43.074	-40.384
C19orf35	A	-14.894	-18.519	-26.251
C19orf38	A	-10.929	-29.024	-36.808
C19orf43	A	0.427	5.662	-14.871
C19orf44	A	-30.619	-33.393	-34.157
C19orf47	A	-33.922	-30.921	-49.633
C19orf48	A	-30.873	-37.75	-40.429
C19orf53	A	14.637	21.281	7.302
C19orf54	A	-25.754	-40.236	-39.512
C19orf57	A	-25.487	-46.078	-42.196
C19orf60	A	1.91	-11.313	-19.133
C19orf66	A	-14.117	-45.05	-45.657
C19orf67	A	-13.579	-45.913	-44.959
C19orf68	A	-38.516	-39.095	-49.469
C19orf70	A	-7.65	-14.006	-0.451
C19orf71	A	-33.241	-42.774	-42.392
C19orf73	A	-23.649	-41.382	-39.865
C19orf81	A	-26.01	-47.993	-44.717
C19orf84	A	-41.988	-48.572	-35.011
C1D	A	23.568	22.499	24.448
C1GALT1	A	-34.985	-45.304	-48.537
C1GALT1C1	A	-41.105	-44.253	-52.968
C1GALT1C1L	A	-36.055	-40.344	-42.192
C1orf100	A	-19.015	-35.051	-42.356
C1orf105	A	-35.002	-35.189	-52.126
C1orf106	A	-21.449	-36.357	-37.34
C1orf109	A	33.803	26.435	26.527
C1orf112	A	-17.567	-18.363	-21.252
C1orf115	A	-32.371	-40.422	-47.244
C1orf116	A	-39.115	-38.892	-47.993
C1orf122	A	-26.959	-29.688	-36.234
C1orf123	A	-16.97	-33.981	-31.237
C1orf127	A	-26.314	-38.318	-34.496
C1orf131	A	-10.055	-15.587	-20.234
C1orf141	A	-29.151	-48.36	-39.393
C1orf146	A	-26.408	-35.818	-33.31
C1orf158	A	-41.585	-51.918	-56.797
C1orf159	A	-27.121	-39.199	-46.003
C1orf162	A	-7.906	-22.874	-19.138
C1orf167	A	-37.842	-44.816	-40.887
C1orf168	A	-40.035	-23.324	-38.27
C1orf174	A	-43.446	-53.231	-55.157
C1orf185	A	-19.765	-34.387	-42.691
C1orf186	A	-16.146	-39.982	-23.849
C1orf189	A	-36.695	-34.648	-35.66
C1orf194	A	-31.569	-33.956	-36.615
C1orf198	A	-43.906	-49.737	-53.912
C1orf204	A	-38.229	-36.798	-38.367
C1orf21	A	-41.045	-44.416	-47.803
C1orf210	A	-30.165	-28.466	-47.681
C1orf216	A	-29.256	-30.883	-34.862
C1orf226	A	-33.853	-33.292	-36.383
C1orf228	A	-19.827	-14.827	-32.625
C1orf27	A	-21.879	-23.962	-21.412
C1orf35	A	-29.067	-43.573	-37.877
C1orf43	A	-44.575	-45.994	-48.346
C1orf50	A	-35.542	-28.355	-44.89
C1orf52	A	-27.159	-22.048	-24.76
C1orf53	A	-38.913	-42.593	-50.71
C1orf54	A	-37.204	-34.325	-46.93
C1orf56	A	-36.652	-33.566	-23.376
C1orf61	A	-20.33	-30.957	-28.596
C1orf64	A	-36.851	-36.623	-50.135
C1orf68	A	-23.705	-40.649	-50.33
C1orf74	A	-21.634	-39.306	-41.738
C1orf87	A	-38.897	-48.177	-48.896
C1orf94	A	-38.629	-42.745	-43.477
C1QA	A	-36.657	-43.752	-35.669
C1QB	A	-9.229	-18.11	-13.333
C1QBP	A	27.992	20.722	22.63
C1QC	A	-38.793	-36.645	-47.368
C1QL1	A	-28.733	-32.596	-25.97
C1QL2	A	-26.784	-24.189	-23.954
C1QL3	A	-26.68	-50.045	-52.565
C1QL4	A	-30.486	-39.126	-33.307
C1QTNF1	A	-19.215	-37.575	-37.227
C1QTNF2	A	-40.615	-44.68	-48.09
C1QTNF3	A	-20.276	-11.551	-23.02
C1QTNF4	A	-18.454	-22.971	-7.506
C1QTNF5	A	-17.789	-37.645	-28.072
C1QTNF6	A	-18.729	-36.181	-49.165
C1QTNF7	A	-29.703	-31.509	-45.491
C1QTNF8	A	-34.354	-37.86	-48.445
C1QTNF9	A	-24.337	-40.794	-35.638
C1QTNF9B	A	-9.303	-10.041	2.548
C1R	A	-26.573	-46.217	-50.348
C1RL	A	-36.036	-38.417	-34.598
C1S	A	-21.082	-40.884	-41.023
C2	A	-39.173	-42.428	-45.786
C20orf144	A	-14.843	-13.313	-22.925
C20orf173	A	-28.849	-29.451	-41.475
C20orf194	A	-14.179	-30.458	-39.279
C20orf196	A	-14.796	-32.223	-23.331
C20orf202	A	-41.37	-42.119	-36.573
C20orf24	A	-22.439	-27.736	-25.513
C20orf27	A	-39.075	-28.177	-38.207
C20orf85	A	-40.97	-47.297	-46.325
C20orf96	A	-16.936	-36.717	-33.06
C21orf140	A	-39.374	-38.076	-47.117
C21orf2	A	-32.481	-34.87	-42.277
C21orf33	A	-30.132	-44.031	-51.503
C21orf58	A	-17.659	-18.36	-29.18
C21orf62	A	-15.349	-42.947	-34.069
C21orf91	A	-45.032	-39.808	-47.49
C22orf15	A	-23.474	-32.307	-24.998
C22orf23	A	-22.425	-29.06	-28.358
C22orf29	A	-27.186	-40.13	-32.814
C22orf31	A	-34.312	-46.319	-48.507
C22orf39	A	-21.137	-45.57	-43.858
C22orf42	A	-40.037	-52.596	-50.244
C22orf46	A	-16.193	-30.991	-26.247
C2CD2	A	-27.386	-31.808	-27.079
C2CD2L	A	-14.492	-36.15	-31.333
C2CD3	A	-19.356	-20.179	-28.853
C2CD4A	A	-21.282	-30.256	-36.304
C2CD4B	A	-31.444	-28.867	-30.682
C2CD4C	A	-38.613	-42.217	-42.688
C2CD4D	A	-17.498	-22.23	-31.08
C2CD5	A	-30.544	-50.823	-48.238
C2orf15	A	-43.194	-33.828	-31.617
C2orf16	A	-37.773	-45.955	-45.235
C2orf40	A	-20.127	-34.016	-34.77
C2orf42	A	-27.795	-35.786	-37.759
C2orf49	A	3.561	-1.177	0.22
C2orf50	A	-40.598	-40.677	-46.135
C2orf54	A	-36.906	-33.618	-46.959
C2orf66	A	-30.302	-34.301	-38.718
C2orf68	A	-23.775	-29.199	-29.52
C2orf69	A	-36.134	-41.192	-41.063
C2orf70	A	-38.777	-44.487	-49.575
C2orf71	A	-16.375	-22.458	-13.518
C2orf72	A	-32.066	-38.806	-45.09
C2orf73	A	-34.227	-36.174	-46.103
C2orf74	A	-20.209	-34.473	-35.805
C2orf76	A	-3.088		-5.749
C2orf76	A		13.263
C2orf78	A	-24.418	-28.942	-30.698
C2orf80	A	-36.429	-50.07	-44.483
C2orf81	A	-40.237	-26.38	-19.98
C2orf82	A	-43.009	-52.232	-54.285
C2orf83	A	-37.047	-50.395	-43.71
C2orf88	A	-30.48	-48.645	-52.932
C2orf91	A	-25.484	-29.355	-27.909
C3	A	-42.36	-28.254	-38.222
C3AR1	A	-29.116	-43.746	-49.971
[truncated: 16,944 more rows]

## Sheet: BAGEL sub-library B.
Gene symbol	Sub-library	bulk	SCC11	SCC12
A1BG	B	-8.208	-26.014	-20.083
A1CF	B	-17.992	-37.244	-34.122
A2M	B	-19.478	-34.485	-24.966
A2ML1	B	-36.878	-37.99	-35.725
A3GALT2	B	-32.979	-42.397	-36.493
A4GALT	B	-28.217	-36.215	-30.485
A4GNT	B	-21.409	-43.872	-37.283
AAAS	B	-1.806	-24.599	-20.287
AACS	B	-18.322	-19.714	-17.457
AADAC	B	-19.936	-43.804	-43.254
AADACL2	B	-28.904	-39.792	-29.668
AADACL3	B	-26.896	-40.057	-35.453
AADACL4	B	-35.173	-41.803	-46.387
AADAT	B	-26.068	-35.372	-28.247
AAED1	B	-25.776	-44.437	-28.564
AAGAB	B	-14.579	-5.69	-3.48
AAK1	B	-19.488	-28.648	-25.937
AAMP	B	21.928	25.927	27.975
AANAT	B	-11.388	-32.765	-23.85
AAR2	B	-19.664	-40.927	-20.138
AARD	B	-26.997	-41.555	-40.294
AARS	B	14.239	12.898	25.749
AARS2	B	13.373	22.74	13.528
AASDH	B	-10.637	-33.358	-24.81
AASDHPPT	B	22.823	15.916	17.477
AASS	B	-33.371	-30.84	-42.725
AATF	B	27.271	17.197	18.329
AATK	B	-12.879	-14.504	-30.379
ABAT	B	-19.949	-37.254	-31.403
ABCA1	B	-19.349	-31.97	-28.863
ABCA10	B	-34.047	-35.245	-45.077
ABCA12	B	-26.907	-32.203	-33.941
ABCA13	B	-28.031	-29.574	-32.378
ABCA2	B	-29.775	-26.801	-33.365
ABCA3	B	-11.821	-28.826	-24.555
ABCA4	B	-24.776	-28.724	-24.931
ABCA5	B	-20.751	-40.757	-43.142
ABCA6	B	-32.393	-40.72	-45.049
ABCA7	B	-30.476	-42.938	-30.845
ABCA8	B	-14.906	-33.369	-18.136
ABCA9	B	-30.692	-37.711	-43.806
ABCB1	B	-13.017	-22.727	-35.232
ABCB10	B	-28.959	-35.113	-33.739
ABCB11	B	-24.117	-32.08	-39.237
ABCB4	B	-14.249	-41.157	-35.487
ABCB5	B	-23.952	-36.545	-30.782
ABCB6	B	-21.765	-37.539	-32.389
ABCB7	B	19.316	20.787	17.594
ABCB8	B	-11.325	-32.566	-19.893
ABCB9	B	-12.489	-25.209	-26.95
ABCC1	B	-14.901	-39.367	-22.874
ABCC10	B	-3.298	-29.073	-37.145
ABCC11	B	-28.925	-38.708	-30.049
ABCC12	B	-29.595	-37.877	-27.454
ABCC2	B	-26.72	-33.747	-41.258
ABCC3	B	-21.144	-44.038	-38.598
ABCC4	B	-36.235	-41.457	-31.687
ABCC5	B	-16.912	-43.582	-40.042
ABCC6	B	-16.539	-28.01	-37.141
ABCC8	B	-28.891	-22.98	-30.799
ABCC9	B	-29.485	-41.662	-37.546
ABCD1	B	-22.363	-38.145	-35.464
ABCD2	B	-26.223	-31.389	-22.439
ABCD3	B	-23.056	-43.924	-28.643
ABCD4	B	-22.302	-18.49	-33.798
ABCE1	B	13.386	28.671	30.599
ABCF1	B	5.563
ABCF1	B		7.621	14.525
ABCF2	B	-1.512	-14.742	-35.133
ABCF3	B	-22.344	-39.338	-31.952
ABCG1	B	-28.248	-23.615	-29.692
ABCG2	B	-30.359	-46.204	-40.683
ABCG4	B	-27.186	-34.623	-38.053
ABCG5	B	-19.577	-34.934	-26.741
ABCG8	B	-8.641	-34.063	-19.279
ABHD1	B	-25.114	-41.818	-42.326
ABHD10	B	-24.985	-27.456	-21.866
ABHD11	B	14.802	9.386	17.403
ABHD12	B	-17.525	-44.199	-34.879
ABHD12B	B	-11.144	-20.86	-32.085
ABHD13	B	-27.277	-43.968	-40.329
ABHD14B	B	-22.587	-37.222	-37.841
ABHD15	B	-13.009	-20.001	-25.378
ABHD16A	B	-3.874	-25.264	-19.757
ABHD16B	B	-35.155	-27.658	-28.765
ABHD17A	B	-9.232	-22.883	-25.478
ABHD17B	B	-22.812	-36.099	-16.053
ABHD17C	B	-14.548	-26.897	-28.087
ABHD18	B	-2.476	-27.908	-9.909
ABHD2	B	-18.782	-31.616	-26.29
ABHD3	B	-16.986	-42.51	-30.277
ABHD4	B	-34.195	-36.589	-39.666
ABHD5	B	-19.396	-31.677	-27.683
ABHD6	B	-27.878	-36.125	-34.676
ABHD8	B	-25.142	-33.749	-29.62
ABI1	B	-10.193	-27.174	-32.147
ABI2	B	-21.579	-35.009	-18.384
ABI3	B	-9.682	-28.84	-40.552
ABI3BP	B	-22.571	-35.47	-18.447
ABL1	B	-17.88	-44.809	-31.312
ABL2	B	-25.104	-33.168	-36.815
ABLIM1	B	-18.681	-38.887	-38.784
ABLIM2	B	-20.923	-25.717	-33.542
ABLIM3	B	-37.883	-40.012	-44.02
ABO	B	-25.47	-42.228	-40.819
ABR	B	-21.283	-46.471	-32.304
ABRA	B	-26.637	-34.761	-34.038
ABRACL	B	-39.041	-44.117	-45.538
ABT1	B	14.549	9.458	6.2
ABTB1	B	-26.824	-39.752	-35.384
ABTB2	B	-25.99	-40.133	-35.959
ACAA1	B	-31.166	-41.849	-47.413
ACAA2	B	-27.797	-40.124	-40.815
ACACA	B		1.294
ACACA	B	17.262		14.515
ACACB	B	-7.52	-30.109	-35.939
ACAD10	B	-5.311	-9.205	-38.446
ACAD11	B	-23.068	-34.794	-35.138
ACAD8	B	-36.813	-47.444	-35.03
ACAD9	B	-4.181	-9.069	-9.334
ACADL	B	-28.085	-26.662	-27.851
ACADM	B	-19.321	-39.904	-26.535
ACADS	B	-23.247	-41.137	-45.619
ACADSB	B	-16.967	-46.108	-35.358
ACADVL	B	-4.017	-18.772	-36.296
ACAN	B	-11.953	-19.53	-10.653
ACAP1	B	-16.378	-26.491	-26.014
ACAP2	B	-21.834	-30.32	-32.8
ACAP3	B	-12.095	-36.429	-39.434
ACAT1	B	-38.345	-39.934	-47.233
ACAT2	B	-27.002	-31.848	-34.017
ACBD3	B	-14.871	-21.712	-25.167
ACBD4	B	0.462	-24.616	-17.355
ACBD5	B	2.287	-38.406	-21.684
ACBD6	B	-33.153	-31.422	-36.998
ACBD7	B	-29.58	-44.447	-43.297
ACCS	B	-14.94	-24.578	-25.444
ACCSL	B	-14.413	-23.389	-23.958
ACD	B	-6.809	-15.271	-9.43
ACE	B	-22.013	-43.637	-40.516
ACE2	B	-23.089	-36.151	-22.192
ACER1	B	-16.564	-25.415	-26.924
ACER2	B	-32.423	-46.188	-36.172
ACER3	B	-24.31	-34.941	-45.13
ACHE	B	-22.97	-30.859	-31.212
ACIN1	B			0.184
ACIN1	B	6.447	10.775
ACKR1	B	-24.409	-41.402	-39.86
ACKR2	B	-20.455	-29.365	-19.234
ACKR3	B	-21.933	-31.143	-37.264
ACKR4	B	-23.434	-36.431	-30.188
ACLY	B	22.015	27.03	29.654
ACMSD	B	-31.198	-33.585	-35.476
ACO1	B	-26.419	-25.831	-34.754
ACO2	B			-21.308
ACO2	B	7.375	27.825
ACOD1	B	-22.571	-38.669	-40.677
ACOT1	B	-35.257	-41.121	-48.247
ACOT11	B	-12.678	-37.289	-34.483
ACOT12	B	-14.711	-26.148	-30.394
ACOT13	B	-19.175	-42.246	-39.247
ACOT2	B	-18.344	-40.545	-33.675
ACOT4	B	-17.023	-44.638	-42.081
ACOT7	B	-25.931	-33.533	-32.486
ACOT8	B	-27.347	-35.742	-32.959
ACOT9	B	-12.632	-24.357	-33.753
ACOX1	B	-16.426	-42.905	-29.118
ACOX2	B	-19.033	-34.876	-32
ACOX3	B	-32.502	-47.215	-41.15
ACOXL	B	1.782	-17.312	-21.827
ACP1	B	-27.329	-47.415	-43.821
ACP2	B	2.018	-32.208	-30.909
ACP5	B	-11.544	-37.447	-34.09
ACP6	B	-37.456	-36.321	-25.444
ACP7	B	-8.896	-33.779	-21.557
ACPP	B	-15.955	-38.057	-20.614
ACPT	B	-22.356	-34.458	-37.012
ACR	B	-26.383	-28.297	-25.841
ACRBP	B	-14.722	-28.598	-24.447
ACRV1	B	-36.075	-43.399	-44.562
ACSBG1	B	-5.032	-36.253	-28.575
ACSBG2	B	-33.654	-45.057	-36.574
ACSF2	B	-20.467	-34.022	-29.12
ACSF3	B	-15.503	-31.492	-23.648
ACSL1	B	-24.889	-34.536	-38.355
ACSL3	B	-21.844	-42.26	-37.529
ACSL4	B	-30.822	-35.764	-36.792
ACSL5	B	-21.499	-32.846	-39.592
ACSM1	B	-34.679	-34.775	-30.68
ACSM2A	B	-33.965	-21.94	-37.977
ACSM2B	B	-25.153	-41.592	-34.904
ACSM3	B	-21.384	-31.269	-24.522
ACSM4	B	-26.263	-41.159	-37.915
ACSM5	B	-17.83	-36.209	-36.842
ACSM6	B	-23.831	-38.423	-30.933
ACSS1	B	-26.92	-40.796	-35.496
ACSS2	B	-11.04	-27.83	-30.77
ACSS3	B	-28.198	-26.591	-25.328
ACTA1	B	-24.718	-25.569	-32.793
ACTA2	B	-27.214	-34.861	-34.649
ACTB	B			2.324
ACTB	B	7.792	17.545
ACTBL2	B	-33.638	-41.258	-38.278
ACTC1	B	-25.71	-35.549	-18.288
ACTG1	B			2.844
ACTG1	B	6.098	12.951
ACTG2	B	-13.242	-16.052	-26.104
ACTL10	B	-20.46	-38.78	-43.398
ACTL6A	B	27.926	27.58	26.76
ACTL6B	B	-26.041	-43.357	-26.95
ACTL7A	B	-27.85	-32.773	-20.429
ACTL7B	B	-31.536	-29.481	-38.057
ACTL8	B	-17.226	-36.75	-30.525
ACTL9	B	-13.411	-23.76	-22.415
ACTN1	B	-23.303	-36.96	-27.27
ACTN2	B	-22.018	-27.757	-26.925
ACTN3	B	-28.951	-29.24	-41.641
ACTN4	B	-20.663	-31.495	-33.658
ACTR10	B	27.855	15.903	15.523
ACTR1A	B	23.92	15.538	22.246
ACTR1B	B	-11.395	-21.468	-15.529
ACTR2	B	25.353	28.8	26.642
ACTR3	B	11.21	16.098	13.268
ACTR3B	B	-26.635	-27.395	-22.24
ACTR3C	B	-21.216	-34.292	-25.428
ACTR5	B	1.409	5.765	0.052
ACTR6	B		-21.139	-10.488
ACTR6	B	10.2
ACTR8	B	22.246	18.246	18.827
ACTRT1	B	-11.569	-40.196	-43.584
ACTRT2	B	-28.553	-43.562	-48.981
ACTRT3	B	-14.53	-33.534	-17.664
ACVR1	B	-15.401	-13.43	-30.242
ACVR1B	B	-21.448	-29.841	-42.461
ACVR1C	B	-32.916	-45.051	-42.862
ACVR2A	B	-21.559	-19.666	-29.661
ACVR2B	B	-21.976	-36.339	-41.347
ACVRL1	B	-28.406	-29.282	-41.979
ACY3	B	-16.408	-39.934	-30.369
ACYP1	B	-12.061	-34.39	-48.524
ACYP2	B	-23.903	-34.026	-36.796
ADA	B	-18.178	-43.017	-38.151
ADAD1	B	-24.448	-42.69	-34.135
ADAD2	B	-29.706	-38.095	-37.803
ADAL	B	-9.015	-18.712	-9.081
ADAM10	B	-31.548	-46.584	-46.549
ADAM11	B	-16.777	-10.665	-17.991
ADAM12	B	-25.526	-40.986	-32.979
ADAM15	B	-22.261	-34.314	-30.119
ADAM17	B	-31.519	-33.848	-38.305
ADAM18	B	-31.48	-20.831	-18.17
ADAM19	B	-33.199	-37.28	-33.255
ADAM2	B	-21.268	-37.511	-31.123
ADAM20	B	-31.013	-44.577	-42.063
ADAM21	B	-25.449	-30.353	-31.814
ADAM22	B	-30.215	-40.292	-37.504
ADAM23	B	-24.166	-47.941	-42.344
ADAM28	B	-21.615	-42.637	-35.547
ADAM29	B	-38.971	-47.272	-45.016
ADAM30	B	-23.83	-41.205	-29.469
ADAM32	B	-29.861	-27.865	-40.488
ADAM33	B	-17.86	-23.621	-7.175
ADAM7	B	-18.474	-22.995	-26.415
ADAM8	B	-35.753	-37.591	-45.121
ADAM9	B	-17.707	-21.974	-18.61
ADAMDEC1	B	-26.447	-39.142	-37.511
ADAMTS1	B	-24.113	-34.392	-25.461
ADAMTS10	B	-11.22	-30.364	-23.621
ADAMTS12	B	-31.629	-35.734	-43.412
ADAMTS13	B	-20.356	-32.182	-39.48
ADAMTS14	B	-33.678	-43.633	-43.554
ADAMTS15	B	-34.639	-41.376	-43.633
ADAMTS16	B	-26.909	-45.174	-32.135
ADAMTS17	B	-31.966	-39.788	-38.39
ADAMTS18	B	-34.005	-42.266	-44.394
ADAMTS19	B	-29.619	-44.622	-42.715
ADAMTS2	B	-6.559	-21.378	-22.641
ADAMTS20	B	-14.293	-34.71	-23.311
ADAMTS3	B	-14.333	-30.413	-19.719
ADAMTS4	B	-25.131	-33.55	-29.307
ADAMTS5	B	-21.431	-32.103	-37.078
ADAMTS6	B	-29.051	-40.942	-35.747
ADAMTS7	B	-18.58	-22.083	-15.072
ADAMTS8	B	-20.554	-31.247	-30.581
ADAMTS9	B	-29.252	-34.527	-32.589
ADAMTSL1	B	-24.532	-36.448	-35.139
ADAMTSL2	B	-26.214	-44.658	-41.538
ADAMTSL3	B	-15.675	-11.999	-21.528
ADAMTSL4	B	-27.117	-29.249	-22.507
ADAMTSL5	B	-13.779	-24.001	-24.651
ADAP1	B	-13.481	-38.421	-34.882
ADAP2	B	-12.648	-29.251	-21.134
ADAR	B	-11.025	-31.864	-33.628
ADARB1	B	-21.31	-39.152	-38.251
ADARB2	B	-24.842	-39.567	-37
ADAT1	B	-35.079	-43.835	-34.595
ADAT2	B	1.96
ADAT2	B		26.225	30.596
ADAT3	B	17.054	21.484	22.767
ADCK1	B	-24.495	-33.237	-35.272
ADCK2	B	-23.917	-31.484	-35.145
ADCK5	B	-10.95	-22.037	-21.56
ADCY1	B	-19.376	-37.41	-40.402
ADCY10	B	-14.147	-44.426	-36.549
ADCY2	B	-29.035	-38.599	-33.065
ADCY3	B	-13.959	-21.752	-18.105
ADCY4	B	-3.712	-12.308	-27.769
ADCY5	B	-20.393	-38.64	-32.397
ADCY6	B	-10.572	-18.92	-26.694
ADCY7	B	-18.14	-42.299	-37.558
ADCY8	B	-10.104	-30.318	-46.133
ADCY9	B	-15.097	-31.416	-37.131
ADCYAP1	B	-28.753	-35.005	-36.045
ADCYAP1R1	B	-26.942	-37.277	-25.274
ADD1	B	-19.392	-34.644	-31.273
ADD2	B	-28.288	-23.267	-22.483
ADD3	B	-15.733	-36.751	-23.86
ADGB	B	-25.731	-29.056	-35.283
ADGRA1	B	-34.255	-39.257	-41.576
ADGRA2	B	-25.418	-30.067	-39.299
ADGRA3	B	-34.782	-33.255	-32.972
ADGRB1	B	-30.462	-27.108	-34.104
ADGRB3	B	-33.228	-38.384	-30.283
ADGRD1	B	-26.955	-30.567	-42.949
ADGRE1	B	-18.085	-40.888	-40.971
ADGRE2	B	-26.567	-38.35	-30.06
ADGRE3	B	-35.328	-46.123	-44.626
ADGRE5	B	-28.689	-36.59	-32.421
ADGRF3	B	-29.163	-24.76	-38.261
ADGRF4	B	-22.911	-32.604	-37.576
ADGRF5	B	-31.81	-25.753	-36.338
ADGRG1	B	-27.42	-31.734	-21.728
ADGRG2	B	-17.635	-39.736	-42.16
ADGRG3	B	-28.073	-36.822	-35.797
ADGRG4	B	-22.946	-27.697	-27.459
ADGRG5	B	-14.274	-27.385	-19.769
ADGRG6	B	-24.573	-35.117	-25.433
ADGRG7	B	-24.765	-40.24	-32.388
ADGRL1	B	-10.957	-37.374	-29.764
ADGRL2	B	-32.708	-35.67	-37.296
ADGRL3	B	-14.871	-30.137	-29.034
ADGRL4	B	-25.015	-21.077	-28.354
ADGRV1	B	-19.795	-36.608	-31.806
ADH1A	B	-25.874	-44.202	-40.784
ADH1B	B	-18.258	-38.667	-39.477
ADH1C	B	-24.596	-35.007	-46.742
ADH4	B	-14.018	-33.049	-38.966
ADH5	B	-20.299	-41.388	-14.192
ADH6	B	-21.515	-36.884	-44.199
ADH7	B	-12.47	-38.971	-42.612
ADHFE1	B	-7.879	-6.409	-16.2
ADI1	B	-8.782	-28.976	-17.072
ADIG	B	-25.522	-39.191	-33.187
ADIPOQ	B	-24.62	-39.424	-41.535
ADIPOR1	B	-6.66	-31.613	-16.223
ADIPOR2	B	-33.469	-44.414	-44.447
ADIRF	B	-15.825	-35.608	-27.792
ADK	B	-15.042	-23.18	-36.644
ADM	B	-24.433	-40.477	-34.529
ADM2	B	-18.247	-28.419	-36.476
ADM5	B	-13.943	-26.774	-32.418
ADNP	B	-9.43	-33.714	-10.767
ADNP2	B	-33.03	-48.316	-43.61
ADO	B	-24.389	-28.091	-23.441
ADORA1	B	-25.644	-36.509	-41.041
ADORA2B	B	-29.934	-39.457	-38.005
ADPGK	B	-9.89	-21.091	-16.198
ADPRH	B	-13.144	-37.102	-31.471
ADPRHL1	B	-27.536	-41.981	-42.471
ADPRHL2	B	-15.805	-29.205	-32.612
ADPRM	B	-27.583	-42.607	-38.243
ADRA1A	B	-34.421	-41.004	-35.69
ADRA1B	B	-32.457	-38.727	-41.778
ADRA1D	B	-8.16	-17.629	-19.164
ADRA2A	B	-26.037	-46.729	-39.848
ADRA2B	B	-20.589	-33.548	-28.845
ADRA2C	B	-28.92	-41.409	-43.631
ADRB1	B	-29.148	-44.279	-45.974
ADRB2	B	-32.256	-42.633	-35.196
ADRB3	B	-24.824	-19.165	-21.166
ADRM1	B	-13.869	-33.055	-15.746
ADSL	B	29.572	28.732	30.603
ADSS	B	21.171	21.858	24.278
ADSSL1	B	-25.121	-38.348	-44.544
ADTRP	B	-24.801	-41.731	-30.831
AEBP1	B	-18.705	-22.116	-22.314
AEBP2	B	-14.69	-19.609	-19.501
AEN	B	-1.748	-16.551
AEN	B			9.998
AES	B	-17.41	-23.85	-20.697
AFAP1	B	-31.72	-41.172	-41.365
AFAP1L1	B	-10.169	-19.837	-22.147
AFAP1L2	B	-2.06	-29.687	-9.735
AFDN	B	-40.089	-41.499	-47.37
AFF1	B	-15.8	-35.145	-38.368
AFF2	B	-35.782	-46.183	-46.059
AFF3	B	-20.287	-37.421	-32.327
AFF4	B	-29.666	-34.978	-32.782
AFG3L2	B	20.526	26.477	11.638
AFM	B	-29.154	-46.918	-29.775
AFMID	B	-14.661	-32.412	-31.458
AFP	B	-28.756	-36.4	-41.306
AFTPH	B	-34.01	-34.649	-26.543
AGA	B	-31.426	-30.046	-40.568
AGAP1	B	-37.743	-46.933	-39.194
AGAP2	B	-0.5	-25.577	-19.729
AGAP3	B	-16.42	-32.915	-35.212
AGAP4	B	13.214	13.661	11.092
AGAP6	B	9.596	11.823	19.11
AGAP9	B	-2.962	-12.419	-7.33
AGBL1	B	-7.716	-26.71	-15.977
AGBL2	B	-12.779	-29.932	-24.658
AGBL3	B	-16.735	-33.062	-30.82
AGBL4	B	-14.433	-37.615	-33.185
AGBL5	B	-26.499	-41.348	-36.87
AGER	B	-26.467	-31.222	-41.886
AGFG1	B	-8.582	-28.044	-26.105
AGFG2	B	-23.969	-29.993	-23.943
AGGF1	B	-7.092	-7.171	-26.365
AGK	B	-2.226	0.372	-23.179
AGL	B	-20.682	-43.864	-40.851
AGMAT	B	-28.437	-38.526	-30.927
AGMO	B	-18.559	-42.625	-44.857
AGO1	B	-29.376	-44.412	-41.963
AGO2	B	-3.01	-33.673	-20.88
AGO3	B	-21.274	-33.626	-21.9
AGO4	B	-20.288	-24.627	-8.835
AGPAT1	B	-12.342	-31.721	-30.487
AGPAT2	B	-17.614	-38.192	-41.787
AGPAT3	B	-25.134	-42.941	-26.264
AGPAT4	B	-10.027	-36.974	-37.118
AGPAT5	B	-1.778	-26.555	4.536
AGPS	B	-2.019	-39.097	-36.794
AGR2	B	-30.055	-34.605	-36.124
AGR3	B	-17.914	-30.776	-32.572
AGRN	B	-24.59	-41.864	-38.405
AGRP	B	-32.108	-35.861	-35.127
AGT	B	-9.109	-31.046	-37.582
AGTPBP1	B	-30.017	-32.829	-32.108
AGTR1	B	-19.656	-35.21	-25.364
AGTR2	B	-29.505	-42.416	-42.601
AGTRAP	B	-28.723	-39.311	-33.858
AGXT	B	-31.983	-22.657	-41.275
AGXT2	B	-26.603	-43.528	-33.229
AHCTF1	B	20.199	16.016	11.441
AHCY	B	17.282	28.664	30.601
AHCYL1	B	-11.417	-6.825	-12.04
AHCYL2	B	-27.244	-34.878	-22.679
AHDC1	B	-23.176	-41.75	-39.374
AHI1	B	-16.154	-25.741	-29.27
AHNAK	B	-19.135	-9.809	-33.416
AHNAK2	B	-29.021	-42.685	-42.51
AHRR	B	-17.645	-29.541	-28.9
AHSA1	B	-23.932	-42.642	-41.173
AHSA2	B	-16.344	-37.463	-26.299
AHSG	B	-23.34	-33.573	-44.787
AHSP	B	-23.467	-38.752	-39.841
AICDA	B	-15.533	-39.826	-36.649
AIDA	B	-19.01	-43.997	-35.862
AIF1	B	-19.491	-36.072	-28.45
AIF1L	B	-10.528	-20.735	-23.151
AIFM1	B	15.985	22.082	30.629
AIFM2	B	-17.076	-20.936	-16.314
AIFM3	B	-26.93	-36.744	-37.164
AIG1	B	-23.91	-34.975	-28.6
AIM2	B	-36.617	-37.059	-31.842
AIMP1	B	-11.74	-12.804	-18.619
AIMP2	B	-15.735	-25.215	-32.313
AIP	B	-15.214	-16.35	-11.932
AIPL1	B	-8.919	-26.271	-22.187
AIRE	B	-34.06	-38.821	-40.959
AJAP1	B	-14.992	-25.838	-24.521
AJUBA	B	-3.887	-33.98	-23.812
AK1	B	-23.41	-16.887	-22.719
AK2	B	15.382	28.594	30.477
AK3	B	-26.665	-32.289	-36.085
AK4	B	-10.372	-15.381
AK4	B			12.594
AK5	B	-27.914	-36.856	-43.752
AK6	B	27.785	28.578	30.367
AK7	B	-31.355	-34.921	-47.126
AK8	B	-18.806	-40.972	-41.096
AK9	B	-22.228	-40.925	-26.739
AKAIN1	B	-31.294	-43.526	-43.334
AKAP1	B	-14.885	-27.082	-31.966
AKAP10	B	-28.154	-27.867	-36.68
AKAP11	B	-28.304	-37.675	-28.401
AKAP12	B	-19.68	-32.178	-37.591
AKAP13	B	-13.81	-31.674	-28.841
AKAP14	B	-27.622	-44.204	-47.05
AKAP17A	B	-31.947	-43.684	-29.231
AKAP3	B	-19.673	-29.903	-35.806
AKAP4	B	-40.034	-40.677	-47.13
AKAP5	B	-16.687	-22.1	-13.289
AKAP6	B	-20.579	-34.055	-37.466
AKAP7	B	-30.435	-37.432	-44.027
AKAP8	B	-23.003	-32.569	-43.224
AKAP8L	B	5.731	-4.359	-6.687
AKAP9	B	-33.97	-29.719	-40.921
AKIP1	B	-19.409	-30.282	-36.51
AKIRIN1	B	-15.063	-27.479	-28.272
AKIRIN2	B	10.489	10.224	6.877
AKNA	B	-25.345	-25.807	-31.125
AKNAD1	B	-17.327	-18.903	-39.476
AKR1A1	B	-20.353	-44.602	-22.814
AKR1B1	B	-30.976	-46.176	-38.75
AKR1B10	B	-24.434	-30.397	-40.167
AKR1B15	B	-28.732	-36.042	-41.203
AKR1C2	B	-20.103	-33.681	-29.718
AKR1C3	B	-17.668	-33.332	-33.909
AKR1C4	B	-32.164	-44.055	-42.156
AKR1D1	B	-26.481	-37.113	-40.441
AKR1E2	B	-26.265	-34.519	-35.381
AKR7A2	B	-31.225	-41.854	-44.87
AKR7A3	B	-20.462	-31.126	-31.572
AKT1	B	-24.238	-31.927	-42.91
AKT1S1	B	-18.747	-29.556	-30.636
AKT2	B	-16.869	-16.306	-13.557
AKT3	B	-10.435	-30.357	-30.38
AKTIP	B	-16.655	-34.347	-28.451
ALAD	B	-7.066	-16.602	-20.179
ALAS1	B	-20.195	-37.622	-43.727
ALAS2	B	-36.647	-46.001	-43.742
ALB	B	-27.491	-34.669	-29.627
ALCAM	B	-34.912	-37.624	-35.744
ALDH16A1	B	-24.789	-33.193	-38.471
ALDH18A1	B	5.619	-2.351	-17.832
ALDH1A1	B	-28.637	-39.69	-31.776
ALDH1A2	B	-26.711	-36.092	-40.664
ALDH1A3	B	-28.634	-35.545	-36.552
ALDH1B1	B	-12.166	-31.822	-27.059
ALDH1L1	B	-20.847	-23.05	-30.798
ALDH1L2	B	-38.111	-40.707	-33.527
ALDH3A1	B	-6.859	-40.865	-16.605
ALDH3A2	B	-32.714	-46.448	-44.467
ALDH3B1	B	-12.955	-25.196	-23.851
ALDH3B2	B	-5.647	-25.647	-18.365
ALDH4A1	B	-23.301	-39.964	-37.671
ALDH5A1	B	-15.486	-21.282	-31.618
ALDH6A1	B	-27.867	-46.647	-39.98
ALDH7A1	B	-21.166	-44.041	-32.564
ALDH8A1	B	-26.413	-28.564	-19.568
ALDH9A1	B	-18.785	-31.823	-47.244
ALDOA	B	27.273	25.785	26.653
ALDOB	B	-28.522	-41.683	-47.356
ALDOC	B	-15.411	-29.912	-18.51
ALG1	B	15.671	28.739	30.461
ALG10B	B		-13.803	-17.352
ALG10B	B	10.395
ALG11	B	16.082	19.791	27.122
ALG12	B	-19.786	-39.333	-18.103
ALG13	B	14.42	11.144	6.719
ALG14	B	24.335	18.29	19.668
ALG1L	B	-11.132	4.463	2.696
ALG2	B	22.719	19.038	20.485
ALG3	B	-11.755	-26.564	-20.152
ALG5	B	-8.868	-14.349	-23.286
ALG6	B	-2.785	0.41	-24.639
ALG8	B	-11.979	-13.686	-8.916
ALK	B	-20.075	-37.153	-34.803
ALKBH1	B	-5.39	-31.296	-17.881
ALKBH2	B	-32.256	-40.125	-37.227
ALKBH3	B	-2.346	-33.451	-11.636
ALKBH4	B	-23.226	-33.375	-24.665
ALKBH5	B	-1.325	-13.248	-20.455
ALKBH6	B	-17.614	-27.313	-28.61
ALKBH7	B	-11.214	-33.86	-15.09
ALKBH8	B	-27.625	-14.846	-25.841
ALLC	B	-29.346	-33.92	-25.487
ALMS1	B	-9.593	-26.5	-13.941
ALOX12	B	-31.879	-44.415	-47.792
ALOX12B	B	-24.949	-26.261	-27.434
ALOX15	B	-34.011	-39.542	-25.677
ALOX15B	B	-20.351	-26.04	-29.111
ALOX5	B	-21.153	-32.134	-30.92
ALOX5AP	B	-23.017	-28.688	-28.138
ALOXE3	B	-6.506	-40.538	-34.077
ALPI	B	-22.072	-39.639	-28.471
ALPK1	B	-29.007	-39.608	-24.887
ALPK2	B	-23.203	-33.157	-44.74
ALPK3	B	-13.693	-17.966	-19.57
ALPL	B	-14.209	-36.022	-38.617
ALPP	B	-32.208	-29.847	-23.519
ALPPL2	B	-24.803	-39.024	-43.911
ALS2	B	0.776	-38.549	-42.065
ALS2CL	B	2.392	-23.468	-29.825
ALS2CR12	B	-36.741	-44.251	-33.533
ALX1	B	-23.457	-31.874	-41.854
ALX3	B	-13.711	-31.46	-35.977
ALX4	B	-24.854	-27.653	-36.748
ALYREF	B	3.405
ALYREF	B		18.402	10.246
AMACR	B	-29.279	-39.687	-46.655
AMBN	B	-17.227	-22.503	-13.836
AMBP	B	-10.355	-23.526	-23.279
AMBRA1	B	-44.393	-46.747	-51.161
AMD1	B	19.045	27.453	23.306
AMDHD1	B	-29.057	-33.663	-37.499
AMDHD2	B	-29.27	-32.51	-32.201
AMELX	B	-28.427	-44.627	-44.935
AMELY	B	-37.998	-46.771	-51.516
AMER1	B	-29.811	-29.484	-36.219
AMER2	B	-3.336	-24.093	-37.177
AMER3	B	-27.732	-39.771	-42.089
AMFR	B	-33.766	-36.356	-31.127
AMH	B	-28.032	-23.543	-26.36
AMHR2	B	-8.802	-30.602	-32.072
AMIGO1	B	-16.719	-32.8	-1.474
AMIGO2	B	-12.506	-43.484	-41.315
AMIGO3	B	0.184	-25.125	-18.339
AMMECR1	B	-25.946	-40.628	-40.079
AMMECR1L	B	-12.322	-39.888	-29.268
AMN	B	-17.37	-27.204	-31.384
AMN1	B	-18.681	-26.578	-28.365
AMOT	B	-37.025	-41.321	-46.859
AMOTL1	B	-20.341	-40.616	-32.339
AMOTL2	B	-25.945	-44.163	-46.889
AMPD1	B	-22.099	-41.471	-36.919
AMPD2	B	-26.06	-35.22	-31.497
AMPD3	B	-28.336	-33.444	-35.644
AMPH	B	-33.662	-38.29	-39.138
AMT	B	-32.764	-22.252	-25.52
AMTN	B	-25.081	-29.111	-38.301
AMY2A	B	-22.128	-30.095	-7.99
AMZ1	B	-26.786	-34.919	-37.264
AMZ2	B	-15.103	-41.9	-23.46
ANAPC1	B	19.162	27.641	29.542
ANAPC10	B	23.893	22.674	18.286
ANAPC11	B	26.092	28.857	30.6
ANAPC13	B		-1.805	-7.126
ANAPC13	B	19.675
ANAPC15	B	23.29	16.825	7.238
ANAPC16	B	-29.051	-24.54	-31.02
ANAPC2	B	21.624	23.955	27.798
ANAPC4	B	21.267	27.27	26.676
ANAPC5	B	17.407	18.35	20.087
ANAPC7	B	-7.765	-29.047	-32.097
ANGEL1	B	-22.231	-39.142	-37.957
ANGEL2	B	-30.817	-30.479	-44.154
ANGPT1	B	-33.01	-41.137	-45.723
ANGPT2	B	-18.79	-43.905	-40.758
ANGPT4	B	-28.888	-26.464	-13.251
ANGPTL1	B	-32.328	-42.387	-38.8
ANGPTL2	B	-16.836	-33.432	-33.212
ANGPTL3	B	-9.902	-38.06	-43.385
ANGPTL4	B	-21.508	-42.532	-37.181
ANGPTL5	B	-34.424	-29.107	-32.627
ANGPTL6	B	-29.192	-40.138	-35.379
ANGPTL7	B	-26.915	-39.75	-40.429
ANGPTL8	B	-25.45	-22.66	-27.601
ANHX	B	0.781	-43.977	-27.366
ANK1	B	-11.396	-34.912	-25.369
ANK2	B	-16.097	-40.593	-33.058
ANK3	B	-24.544	-38.507	-44.583
ANKAR	B	-32.473	-43.154	-43.53
ANKDD1A	B	-6.635	-23.729	-10.347
ANKDD1B	B	-9.331	-39.517	-38.052
ANKEF1	B	-24.513	-35.172	-32.568
ANKFN1	B	-30.729	-45.165	-41.921
ANKFY1	B	-36.342	-38.257	-37.371
ANKH	B	-23.942	-20.282	-31.44
ANKIB1	B	-22.93	-37.374	-35.909
ANKK1	B	-27.005	-36.027	-39.744
ANKLE1	B	-6.759	-39.656	-31.742
ANKLE2	B	16.529	7.186	20.726
ANKMY1	B	-27.66	-39.619	-30.338
ANKMY2	B	-8.087	-36.539	-41.886
ANKRA2	B	-10.783	-35.054	-23.057
ANKRD1	B	-27.827	-44.008	-38.71
ANKRD10	B	-32.275	-42.448	-41.153
ANKRD11	B	-0.754	-27.777	-22.847
ANKRD12	B	-35.9	-43.341	-43.041
ANKRD13A	B	-29.467	-41.683	-39.758
ANKRD13B	B	-26.144	-33.321	-29.406
ANKRD13C	B	-16.57	-40.531	-35.155
ANKRD13D	B	-17.273	-14.931	-41.776
ANKRD16	B	-28.101	-35.655	-29.758
ANKRD17	B	-5.498	-22.644	-15.605
ANKRD18A	B	-2.323	-25.366	-25.038
ANKRD2	B	-24.3	-37.044	-45.097
ANKRD22	B	-24.456	-28.48	-11.351
ANKRD23	B	-23.696	-37.72	-34.534
ANKRD24	B	-27.121	-34.617	-43.809
ANKRD26	B	-23.569	-35.104	-26.762
ANKRD27	B	-15.3	-24.466	-40.336
ANKRD28	B	-15.919	-38.955	-45.887
ANKRD29	B	-31.737	-32.137	-39.934
ANKRD30A	B	-24.156	-42.162	-40.19
ANKRD30B	B	-35.031	-44.413	-39.758
ANKRD31	B	-29.916	-37.902	-41.681
ANKRD33	B	0.813	-18.079	-22.353
ANKRD33B	B	-33.009	-44.555	-39.551
ANKRD34A	B	-19.304	-17.674	-39.397
ANKRD34B	B	-18.026	-41.239	-36.639
ANKRD34C	B		-10.701	-3.911
ANKRD34C	B	7.316
ANKRD35	B	-29.094	-33.833	-29.092
ANKRD36	B	0.692	-15.734	-8.05
ANKRD36B	B	-14.261	-24.688	-27.08
ANKRD37	B	-32.281	-36.884	-40.959
ANKRD39	B	-19.311	-41.641	-34.979
ANKRD40	B	-2.481	-28.272	-16.352
ANKRD42	B	-26.81	-39	-43.214
ANKRD44	B	-19.395	-37.296	-19.746
ANKRD45	B	-31.397	-41.605	-38.206
ANKRD46	B	-27.747	-42.994	-37.772
ANKRD49	B			2.783
ANKRD49	B	9.494	12.046
ANKRD50	B	-31.726	-39.927	-42.521
ANKRD52	B	-9.539	-6.384	-23.599
ANKRD53	B	-20.051	-19.423	-21.221
ANKRD54	B	-34.521	-35.356	-28.382
ANKRD55	B	-6.956	-39.75	-41.384
ANKRD6	B	-16.064	-37.378	-25.958
ANKRD61	B	-21.287	-43.276	-51.344
ANKRD62	B	-11.324	-40.935	-33.534
ANKRD63	B	-11.406	-31.047	-29.84
ANKRD65	B	-32.914	-38.361	-30.041
ANKRD66	B	-34.974	-32.708	-41.941
ANKRD7	B	-37.494	-39.14	-41.046
ANKRD9	B	-17.394	-31.879	-24.14
ANKS1A	B	-31.995	-31.25	-36.877
ANKS1B	B	-13.763	-32.43	-29.171
ANKS3	B	-30.549	-37.993	-18.873
ANKS4B	B	-20.645	-28.857	-17.649
ANKS6	B	-7.088	-11.371	1.263
ANKUB1	B	-21.957	-33.919	-34.19
ANKZF1	B	-28.237	-43.88	-34.831
ANLN	B	-7.956	-20.943	-13.235
ANO1	B	-17.458	-36.507	-22.755
ANO10	B	-16.603	-41.082	-39.702
ANO2	B	-23.613	-44.171	-40.043
ANO3	B	-29.012	-40.252	-45.486
ANO4	B	-19.155	-40.546	-37.393
ANO5	B	-22.074	-43.776	-39.032
ANO6	B	-6.554	-22.809	-31.426
ANO7	B	-28.282	-38.348	-44.293
ANO8	B	-23.908	-32.254	-29.755
ANO9	B	-14.548	-31.175	-39.287
ANOS1	B	-26.916	-37.524	-46.254
ANP32A	B	-17.873	-6.397	-19.695
ANP32B	B	-28.679	-19.536	-24.102
ANP32D	B	-21.822	-31.751	-28.082
ANP32E	B	-24.991	-17.995	-20.439
ANPEP	B	-19.012	-36.708	-44.846
ANTXR1	B	-20.663	-40.432	-41.484
ANTXR2	B	-32.16	-46.454	-47.695
ANTXRL	B	0.161	-7.841	-11.796
ANXA1	B	-30.045	-43.789	-36.713
ANXA10	B	-34.442	-41.693	-42.175
ANXA11	B	-15.21	-23.982	-26.189
ANXA13	B	-30.336	-35.571	-36.763
ANXA2	B	-16.881	-39.027	-21.708
ANXA2R	B	-28.349	-39.274	-31.547
ANXA3	B	-19.002	-31.144	-40.494
ANXA4	B	-21.832	-40.745	-27.826
ANXA5	B	-10.684	-22.875	-16.212
ANXA6	B	-24.645	-38.091	-18.839
ANXA7	B	-33.366	-35.431	-31.81
ANXA8	B	-4.483	-17.481	-14.702
ANXA9	B	-15.417	-32.205	-19.641
AOAH	B	-31.528	-36.178	-42.901
AOC1	B	-18.753	-30.008	-27.135
AOC2	B	-7.68	-25.329	-17.581
AOC3	B	-12.412	-35.781	-24.338
AOX1	B	-29.028	-44.818	-29.739
AP1AR	B	-27.191	-36.28	-29.248
AP1B1	B	-11.654	-25.464	-25.303
AP1G1	B	-18.914	-34.49	-34.82
AP1G2	B	-19.648	-29.616	-18.359
AP1M1	B	4.782	-31.101	-7.729
AP1M2	B	-12.543	-23.351	-34.297
AP1S1	B	-24.928	-43.963	-36.283
AP1S2	B	-23.295	-41.734	-38.051
AP1S3	B	-24.374	-31.868	-27.064
AP2A1	B	-2.323	-18.029	-22.968
AP2A2	B	-27.171	-27.288	-37.343
AP2B1	B	-12.514	-28.66	-22.365
AP2M1	B	24.413	27.541	30.585
AP2S1	B	18.229	21.879	24.85
AP3B1	B	-16.717	-33.248	-19.429
AP3B2	B	-14.553	-35.003	-14.834
AP3D1	B	-9.68	-31.788	-27.451
AP3M1	B	-17.609	-32.079	-39.95
AP3M2	B	-27.547	-40.644	-37.4
AP3S1	B	-8.331	-30.09	-9.522
AP4B1	B	-27.761	-15.627	-26.739
AP4E1	B	-28.428	-33.813	-38.575
AP4M1	B	-20.096	-33.564	-17.275
AP4S1	B	-19.837	-32.836	-24.875
AP5B1	B	-19.034	-32.666	-28.353
AP5M1	B	-33.387	-41.865	-38.067
AP5S1	B	-28.216	-38.348	-39.051
AP5Z1	B	-17.618	-44.131	-30.045
APAF1	B	-24.629	-25.023	-40.73
APBA1	B	-17.763	-39.069	-26.783
APBA2	B	-3.139	-36.435	-24.521
APBA3	B	-12.061	-39.614	-37.369
APBB1	B	-17.986	-24.437	-33.202
APBB1IP	B	0.29	-42.829	-27.458
APBB2	B	-21.299	-19.212	-31.99
APBB3	B	-26.33	-41.979	-31.832
APC	B	-34.172	-18.721	-32.999
APC2	B	-12.56	-23.281	-14.286
APCDD1	B	-22.201	-40.976	-41.307
APCDD1L	B	-25.414	-32.326	-38.229
APCS	B	-33.019	-32.731	-26.442
APEH	B	-1.099	-19.93	-12.298
APEX1	B	-8.16	5.345	-2.471
APEX2	B	28.599	28.635	30.585
APH1A	B	-21.448	-29.136	-34.136
APH1B	B	-4.89	-3.76	-5.664
API5	B	-9.878	0.909	-12.647
APIP	B	-16.204	-35.485	-36.123
APLF	B	-29.642	-42.546	-42.343
APLN	B	-36.1	-43.044	-49.092
APLNR	B	-26.023	-28.338	-35.483
APLP1	B	-11.856	-24.949	-16.479
APLP2	B	-32.2	-47.792	-46.837
APMAP	B	-25.785	-29.492	-34.403
APOA1	B	-33.945	-31.017	-43.099
APOA2	B	-33.837	-36.771	-30.58
APOA4	B	-34.694	-44.926	-36.185
APOA5	B	-29.486	-39.137	-31.87
APOB	B	-24.86	-39.482	-40.263
APOBEC1	B	-29.478	-39.603	-43.929
APOBEC2	B	-22.998	-35.107	-43.351
APOBEC3A	B	-25.752	-44.244	-46.285
APOBEC3B	B	-28.354	-33.714	-32.72
APOBEC3C	B	-27.535	-44.246	-44.247
APOBEC3F	B	-27.351	-21.444	-27.249
APOBEC3G	B	-28.067	-44.226	-38.737
APOBEC3H	B	-17.859	-32.858	-41.964
APOBEC4	B	-13.683	-11.694	-24.866
APOBR	B	-26.019	-31.015	-31.116
APOC1	B	-14.561	-15.713	-30.659
APOC3	B	-18.234	-29.468	-34.168
APOD	B	-27.71	-37.38	-37.992
APOE	B	-14.694	-35.044	-26.536
APOF	B	-15.747	-30.723	-17.38
APOH	B	-35.213	-43.612	-35.167
APOL1	B	-0.605	-33.311	-17.945
APOL2	B	-24.768	-41.495	-34.689
APOL3	B	-11.542	-19.215	-22.964
APOL4	B	-37.244	-39.437	-38.869
APOL5	B	-28.223	-36.57	-31.526
APOL6	B	-17.522	-41.064	-37.437
APOLD1	B	-17.302	-27.509	-38.243
APOM	B	-22.226	-40.307	-26.474
APOO	B	-12.525	-38.622	-44.772
APOOL	B	-38.727	-40.281	-34.429
APP	B	-23.983	-33.061	-41.424
APPBP2	B	-22.101	-27.864	-27.258
APPL1	B	-14.654	-25.021	-22.786
APPL2	B	-7.406	-38.862	-36.539
APRT	B	-14.357	-17.729	-25.45
APTX	B	-0.294	-29.911	-35.732
AQP10	B	-27.695	-37.894	-43.484
AQP11	B	-29.21	-31.141	-24.275
AQP12B	B	-20.979	-12.829	-27.061
AQP2	B	-30.173	-35.771	-21.421
AQP3	B	-17.198	-1.463	-12.049
AQP4	B	-28.221	-43.683	-42.682
AQP5	B	-19.898	-27.559	-22.324
AQP6	B	-23.497	-38.071	-28.924
AQP7	B	-1.66	1.694	1.386
AQP8	B	-27.628	-47.298	-31.463
AQP9	B	-36.638	-44.614	-37.227
AQR	B	23.002	28.717	22.336
AR	B	-20.255	-35.439	-43.315
ARAF	B	-25.81	-37.539	-40.05
ARAP1	B	-15.704	-40.828	-36.079
ARAP2	B	-34.136	-43.773	-44.815
ARAP3	B	-28.753	-42.711	-40.831
ARC	B	-19.416	-44.378	-32.019
ARCN1	B	20.933	19.661	17.603
AREG	B	-35.328	-39.587	-38.127
AREL1	B	-21.502	-37.528	-34.203
ARF1	B	3.159		-4.868
ARF1	B		9.455
ARF4	B	-11.06	4.309	-16.529
ARF5	B	-28.013	-31.62	-31.626
ARF6	B	-9.094	-32.403	-19.081
ARFGAP1	B	-20.342	-29.475	-26.545
ARFGAP2	B	-27.408	-25.571	-28.347
ARFGAP3	B	-30.804	-40.731	-20.805
ARFGEF1	B	-2.565	-35.22	-23.581
ARFGEF2	B	-20.696	-37.722	-32.601
ARFGEF3	B	-21.623	-37.931	-39.909
ARFIP1	B	-21.876	-27.786	-37.983
ARFIP2	B	-14.345	-33.599	-36.624
ARFRP1	B	13.069	23.936	24.086
ARG1	B	-35.251	-32.602	-37.805
ARG2	B	-22.14	-36.418	-32.133
ARGFX	B	-20.973	-38.2	-37.631
ARGLU1	B	-2.486
ARGLU1	B		7.022	10.195
ARHGAP1	B	-28.188	-20.436	-26.478
ARHGAP10	B	-20.571	-33.738	-39.211
ARHGAP11A	B	-22.239	-14.389	-33.491
ARHGAP11B	B	4.761	-29.258	-20.162
ARHGAP12	B	-18.765	-24.828	-40.85
ARHGAP15	B	-30.398	-41.058	-29.894
ARHGAP17	B	-0.594	-44.664	-35.135
ARHGAP18	B	-24.917	-38.85	-37.865
ARHGAP20	B	-24.045	-37.425	-34.505
ARHGAP21	B	-19.476	-34.835	-19.334
ARHGAP22	B	-19.336	-21.055	-19.521
ARHGAP23	B	-15.821	-28.853	-13.65
ARHGAP24	B	-10.16	-39.891	-40.625
ARHGAP25	B	-21.001	-37.838	-25.722
ARHGAP26	B	-26.517	-39.128	-41.947
ARHGAP27	B	-15.276	-33.642	-28.289
ARHGAP28	B	-15.485	-33.955	-33.532
ARHGAP29	B	-30.59	-28.176	-30.508
ARHGAP30	B	-12.748	-38.484	-32.986
ARHGAP31	B	-5.297	-35.051	-14.941
ARHGAP32	B	-31.753	-38.707	-41.814
ARHGAP33	B	-15.638	-14.56	-14.452
ARHGAP35	B	-11.83	-24.642	-32.76
ARHGAP36	B	-33.181	-45.876	-47.403
ARHGAP39	B	-32.785	-29.254	-30.938
ARHGAP4	B	-36.421	-41.944	-44.803
ARHGAP40	B	-12.732	-30.75	-22.253
ARHGAP44	B	-37.091	-41.177	-37.189
ARHGAP45	B	-29.968	-22.936	-21.633
ARHGAP5	B	-21.71	-27.028	-34.882
ARHGAP6	B	-17.842	-24.795	-28.812
ARHGAP9	B	-12.269	-32.281	-21.632
ARHGDIA	B	-14.962	-19.097	-8.41
ARHGDIB	B	-24.37	-38.569	-21.816
ARHGDIG	B	-29.62	-38.534	-26.494
ARHGEF1	B	-20.007	-38.899	-21.552
ARHGEF10	B	-33.311	-40.175	-37.46
ARHGEF10L	B	-25.597	-26.088	-26.626
ARHGEF11	B	-28.345	-29.571	-31.374
ARHGEF12	B	-14.636	-41.102	-38.37
ARHGEF15	B	-25.375	-36.619	-27.253
ARHGEF16	B	-26.387	-41.777	-36.676
ARHGEF17	B	-25.45	-38.637	-37.115
ARHGEF19	B	-11.473	-24.676	-24.852
ARHGEF2	B	-9.063	-23.19	-25.586
ARHGEF25	B	-4.603	-34.244	-28.923
ARHGEF26	B	-17.109	-23.525	-30.441
ARHGEF28	B	-21.512	-38.387	-39.532
ARHGEF3	B	-25.397	-37.734	-31.224
ARHGEF33	B	-12.505	-36.709	-35.489
ARHGEF35	B	-34.496	-40.539	-37.781
ARHGEF37	B	-17.437	-35.038	-35.288
ARHGEF38	B	-36.294	-39.946	-41.954
ARHGEF39	B	-24.262	-20.352	-35.525
ARHGEF4	B	-24.687	-19.699	-32.062
ARHGEF40	B	-10.755	-22.513	-20.838
ARHGEF5	B	-20.645	-44.76	-46.958
ARHGEF6	B	-30.629	-44.35	-49.142
ARHGEF7	B	-31.118	-43.721	-41.803
ARHGEF9	B	-24.84	-37.789	-43.206
ARID1A	B	-15.274	-25.527	-30.579
ARID1B	B	-23.15	-31.038	-26.968
ARID2	B	-11.768	-23.199	-41.004
ARID3A	B	-26.793	-40.581	-31.158
ARID3B	B	4.109	1.13	-8.897
ARID3C	B	-4.666	-11.546	-8.48
ARID4A	B	-35.386	-41.419	-44.861
ARID4B	B	-7.797	-15.735	-36.85
ARID5A	B	-21.193	-32.63	-27.955
ARID5B	B	-20.006	-36.639	-18.195
ARIH1	B	15.271	24.956	25.118
ARIH2	B	-18.42	-46.739	-38.787
ARIH2OS	B	-29.97	-41.821	-34.083
ARL1	B	-24.924	-26.532	-18.998
ARL10	B	-25.93	-35.465	-26.944
ARL11	B	-39.101	-33.714	-33.648
ARL13A	B	-34.623	-35.744	-41.897
ARL13B	B	-12.811	-19.675	1.311
ARL14	B	-36.689	-40.73	-42.205
ARL14EP	B	-16.151	-18.679	-19.551
ARL15	B	-23.158	-37.813	-35.049
ARL16	B	-26.143	-31.891	-22.572
ARL2BP	B	-37.68	-28.156	-20.563
ARL3	B	-23.245	-33.072	-36.658
ARL4A	B		-23.404	-5.98
ARL4A	B	10.24
ARL4C	B	-27.052	-43.916	-42.881
ARL4D	B	-16.033	-37.594	-35.068
ARL5A	B	-6.76	-33.613	-37.359
ARL5B	B	-28.031	-37.348	-31.309
ARL5C	B	-15.504	-19.16	-34.26
ARL6	B	-15.433	-30.129	-21.43
ARL6IP4	B	-9.566	-38.545	-29.914
ARL6IP5	B	-18.649	-38.353	-23.279
ARL6IP6	B	-2.173	-23.921	-7.161
ARL8A	B	-18.922	-25.832	-23.799
ARL8B	B	-10.723	-23.686	-32.584
ARL9	B	-11.772	-37.136	-21.637
ARMC1	B	-3.994	-28.931	-26.882
ARMC10	B	-5.15	-39.14	-30.696
ARMC12	B	-16.133	-24.635	-19.078
ARMC2	B	-24.944	-37.912	-33.473
ARMC3	B	-21.144	-34.488	-26.925
ARMC4	B	-21.842	-42.238	-39.13
ARMC5	B	-2.337	-26.281	-11.051
ARMC6	B	-11.246	-20.74	-31.682
ARMC7	B	19.433	27.599	29.777
ARMC8	B	-33.763	-25.458	-32.466
ARMC9	B	-19.714	-43.545	-34.926
ARMCX1	B	-37.672	-48.606	-35.331
ARMCX2	B	-36.178	-43.609	-45.751
ARMCX3	B	-12.915	-27.073	-26.375
ARMCX4	B	-34.823	-38.053	-38.542
ARMCX5	B	-36.792	-47.332	-49.953
ARMCX6	B	-22.499	-40.673	-37.033
ARMS2	B	-24.97	-46.193	-40.327
ARMT1	B	-28.824	-23.369	-39.142
ARNT	B	-15.253	-16.137	-31.907
ARNT2	B	-20.074	-28.506	-26.122
ARNTL	B	-7.416	-39.628	-39.942
ARNTL2	B	-7.265	-15.76	-16.082
ARPC2	B	-3.991	1.292	-6.4
ARPC3	B	6.702	23.383	10.512
ARPC5	B	-19.093	-24.472	-29.057
ARPC5L	B	-12.992	-32.807	-26.696
ARPP19	B	-24.421	-31.792	-27.283
ARPP21	B	-37.027	-46.9	-46.221
ARR3	B	-28.365	-40.075	-45.515
ARRB1	B	-21.666	-41.197	-40.192
ARRB2	B	-11.188	-33.285	-25.228
ARRDC1	B	-21.005	-33.002	-24.881
ARRDC2	B	-16.992	-26.083	-33.238
ARRDC3	B	-30.554	-40.917	-38.709
ARRDC4	B	-31.182	-38.662	-45.748
ARRDC5	B	-24.594	-36.627	-30.973
ARSA	B	-1.566	-25.474	-28.549
ARSB	B	-23.357	-32.308	-13.334
ARSD	B	-23.642	-38.635	-39.325
ARSE	B	-20.686	-41.993	-34.933
ARSF	B	-34.599	-38.73	-33.834
ARSG	B	-19.186	-20.297	-25.13
ARSH	B	-40.684	-39.345	-38.309
ARSI	B	-29.165	-30.672	-38.931
ARSJ	B	-16.157	-26.35	-36.363
ARSK	B	-20.643	-28.968	-38.18
ART1	B	-18.386	-40.332	-36.358
ART3	B	-1.634	-38.423	-24.412
ART4	B	-17.976	-30.418	-44.535
ART5	B	-26.425	-27.272	-36.145
ARTN	B	-4.036	-24.394	-18.855
ARV1	B	-15.847	-36.203	-26.835
ARVCF	B	-12.398	-27.672	-30.887
ARX	B	-26.606	-39.572	-41.655
AS3MT	B	-35.083	-33.982	-43.889
ASAH1	B	-20.755	-25.297	-25.471
ASAH2	B	-15.412	-20.766	-18.379
ASAP1	B	-32.102	-41.732	-43.662
ASAP2	B	-23.489	-44.538	-39.667
ASAP3	B	-24.033	-38.464	-27.072
ASB1	B	-21.805	-34.013	-34.461
ASB10	B	-26.31	-42.189	-36.429
ASB11	B	-31.166	-40.633	-36.58
ASB12	B	-32.349	-40.878	-44.016
ASB13	B	-32.019	-37.64	-43.252
ASB14	B	-16.51	-40.561	-42.4
ASB15	B	-27.179	-43.179	-48.237
ASB16	B	-20.194	-23.033	-24.103
ASB17	B	-25.041	-41.742	-32.781
ASB18	B	-35.594	-46.184	-42.411
ASB2	B	-17.691	-34.47	-35.041
ASB4	B	-31.626	-42.673	-33.838
ASB5	B	-26.348	-42.158	-38.52
ASB6	B	-20.583	-26.831	-23.146
ASB7	B	-26.784	-37.019	-23.029
ASB8	B	-35.064	-38.42	-34.327
ASB9	B	-31.932	-40.359	-37.335
ASCC1	B	-23.623	-42.734	-38.155
ASCC2	B	-34.059	-31.286	-35.772
ASCC3	B	-18.162	-3.042	-0.796
ASCL1	B	-22.958	-39.755	-34.035
ASCL2	B	-14.086	-36.465	-32.811
ASCL3	B	-29.654	-38.194	-39.369
ASCL4	B	-23.325	-39.291	-32.035
ASCL5	B	-15.356	-41.424	-34.99
ASF1A	B	-24.757	-36.575	-34.409
ASF1B	B	-20.618	-41.709	-28.905
ASGR1	B	-25.002	-33.376	-38.119
ASGR2	B	-36.951	-36.988	-45.577
ASH1L	B	-28.091	-27.208	-22.473
ASH2L	B	14.004	23.363	17.856
ASIC1	B	-13.46	-29.627	-33.157
ASIC2	B	-22.043	-28.328	-16.615
ASIC3	B	-26.932	-37.653	-33.992
ASIC4	B	-18.92	-38.796	-43.258
ASIC5	B	-33.765	-43.137	-38.842
ASL	B	-19.847	-35.313	-34.701
ASMT	B	-37.336	-42.334	-43.455
ASMTL	B	-24.614	-37.2	-37.106
ASNA1	B	18.641	23.009	29.3
ASNS	B	-15.012	-26.312	-21.343
ASNSD1	B	5.233	-9.373	-13.042
ASPA	B	-34.601	-44.865	-29.744
ASPDH	B	-26.018	-37.859	-30.055
ASPG	B	-31.412	-41.916	-46.797
ASPH	B	-22.76	-38.181	-35.514
ASPHD1	B	-10.632	-42.033	-32.721
ASPHD2	B	-16.804	-43.955	-35.934
ASPM	B	-6.763	-22.388	-17.146
ASPN	B	-31.668	-32.246	-30.482
ASPRV1	B	-26.586	-25.071	-24.471
ASPSCR1	B	-7.074	-16.102
ASPSCR1	B			10.701
ASRGL1	B	-11.221	-28.973	-25.639
ASS1	B	-18.267	-25.592	-24.34
ASTE1	B	-29.926	-37.989	-42.465
ASTL	B	-18.296	-24.78	-30.012
ASTN1	B	-25.539	-37.675	-40.443
ASTN2	B	-16.364	-39.994	-41.873
ASXL1	B	-5.664	-27.987	-30.092
ASXL2	B	-16.817	-32.585	-24.907
ASXL3	B	-32.071	-39.313	-44.246
ASZ1	B	-10.733	-32.507	-39.459
ATAD1	B	-16.874	-37.395	-31.005
ATAD2	B	-23.891	-14.137	-14.873
ATAD2B	B	-27.931	-27.235	-28.492
ATAD3A	B	3.145	-16.278	2.513
ATAD3B	B	0.394	-20.939	-21.334
ATAD3C	B	-23.602	-25.746	-33.782
ATAD5	B			5.922
ATAD5	B	10.602	8.479
ATAT1	B	-33.29	-41.355	-42.141
ATCAY	B	-28.724	-37.235	-30.672
ATE1	B	-38.212	-40.638	-33.084
ATF1	B	-6.856	-23.846	-28.159
ATF2	B	-12.103	-38.071	-20.878
ATF3	B	-16.921	-26.35	-38.374
ATF4	B	-0.46	3.828	-2.373
ATF5	B	-34.982	-27.779	-34.478
ATF6	B	-26.409	-33.6	-27.982
ATF6B	B	-26.398	-31.137	-31.294
ATF7IP	B	-26.691	-27.528	-37.808
ATF7IP2	B	-28.042	-31.883	-45.162
ATG10	B	-13.371	-40.872	-34.088
ATG101	B		-7.775
ATG101	B	7.593		6.575
ATG12	B	-4.348	-8.944	-8.312
ATG13	B	-19.299	-27.257	1.513
ATG14	B	-18.109	-15.617	-20.47
ATG16L1	B	-34.351	-42.817	-41.512
ATG16L2	B	-26.441	-35.699	-22.67
ATG2A	B	-32.37	-29.821	-22.979
ATG2B	B	-20.43	-38.794	-45.315
ATG3	B	-22.731	-29.922	-18.801
ATG4A	B	-29.154	-45.103	-35.362
ATG4B	B	-33.126	-38.477	-38.798
ATG4C	B	-0.992	-18.549	-31.773
ATG4D	B	-13.436	-20.28	-18.754
ATG5	B	-12.177	-31.69	-21.036
ATG7	B	0.279	-20.38	-26.508
ATG9A	B	5.443
ATG9A	B		6.934	20.608
ATG9B	B	-33.84	-39.603	-41.171
ATIC	B	20.125	23.569	19.476
ATL1	B	-18.804	-20.019	-24.051
ATL2	B	22.553	26.971	16.57
ATL3	B	-21.735	-31.616	-27.403
ATM	B	16.727	9.713	22.046
ATMIN	B	-6.58	-33.536	-25.903
ATN1	B	-19.734	-26.58	-18.481
ATOH1	B	-13.33	-37.237	-24.552
ATOH7	B	-14.289	-31.781	-27.066
ATOH8	B	-14.677	-27.403	-21.995
ATOX1	B	-24.081	-37.961	-38.41
ATP10A	B	-24.305	-33.824	-39.805
ATP10D	B	-27.336	-41.261	-39.855
ATP11A	B	-24.164	-32.767	-43.22
ATP11B	B	-22.203	-23.741	-30.198
ATP11C	B	-16.776	-38.578	-40.75
ATP12A	B	-24.157	-28.711	-26.093
ATP13A1	B	-3.616	-5.05	1.755
ATP13A2	B	-27.358	-45.008	-36.199
ATP13A3	B	-31.39	-42.098	-45.692
ATP13A4	B	-31.03	-31.932	-36.984
ATP13A5	B	-33.807	-38.181	-38.637
ATP1A1	B	21.261	11.486	8.803
ATP1A2	B	-34.517	-14.281	-18.778
ATP1A3	B	-5.884	-29.399	-27.67
ATP1A4	B	-32.994	-41.347	-34.428
ATP1B1	B	-20.476	-34.804	-37.666
ATP1B2	B	-8.578	-37.427	-33.127
ATP1B3	B	-21.777	-25.231	-29.327
ATP1B4	B	-28.091	-44.576	-38.39
ATP23	B	-7.405	-29.256	-25.816
ATP2A1	B	-26.226	-30.747	-36.024
ATP2A2	B	26.848	28.785	30.377
ATP2A3	B	-29.839	-27.373	-20.379
ATP2B1	B	-24.862	-25.466	-30.443
ATP2B2	B	-27.629	-32.431	-37.569
ATP2B3	B	-24.743	-36.915	-43.133
ATP2B4	B	-15.749	-37.758	-34.449
ATP2C1	B	-28.449	-40.964	-33.371
ATP2C2	B	-28.455	-28.558	-37.753
ATP4A	B	-3.924	-28.697	-20.258
ATP4B	B	-17.915	-41.62	-36.498
ATP5A1	B	21.292	28.108	27.026
ATP5B	B	16.737	24.112	30.601
ATP5C1	B	15.035	6.04	6.246
ATP5D	B	15.518	19.966	19.954
ATP5F1	B	3.925
ATP5F1	B		8.608	16.609
ATP5G1	B	-10.72	-25.443	-23.169
ATP5G2	B	-16.783	-14.95	-24.437
ATP5G3	B	-25.69	-39.609	-37.179
ATP5H	B	13.545	8.404	7.316
ATP5I	B	-17.92	-25.478	-20.307
ATP5J	B	12.867	10.165	13.394
ATP5L2	B	-28.582	-45.199	-40.209
ATP5S	B	-13.662	-26.79	-25.195
ATP5SL	B	-22.513	-35.324	-18.839
ATP6AP1	B	2.525	-0.955	-15.24
ATP6AP1L	B	-16.425	-28.505	-24.819
ATP6AP2	B	16.493	26.72	24.207
ATP6V0A1	B	-11.045	-22.85	-6.124
ATP6V0A2	B	-23.051	-33.796	-25.541
ATP6V0A4	B	-1.471	-37.324	-30.874
ATP6V0B	B	23.241	24.431	20.852
ATP6V0D1	B	14.426	20.124	25.269
ATP6V0D2	B	4.105	-37.517	-33.704
ATP6V0E1	B	-24.727	-44.013	-39.199
ATP6V0E2	B	-29.037	-43.762	-28.033
ATP6V1A	B	24.197	27.996	28.791
ATP6V1B1	B	-24.333	-24.691	-17.477
ATP6V1B2	B	25.731	28.688	30.59
ATP6V1C1	B	12.154	8.004	12.61
ATP6V1C2	B	-36.611	-18.792	-42.593
ATP6V1D	B	20.391	20.545	20.991
ATP6V1E1	B	11.03	28.732	23.692
ATP6V1E2	B	-24.208	-45.13	-18.077
ATP6V1G1	B	-1.267		4.621
ATP6V1G1	B		9.848
ATP6V1G2	B	-9.09	-32.192	-32.215
ATP6V1G3	B	-39.032	-28.254	-32.22
ATP6V1H	B	-1.832
ATP6V1H	B		14.402	9.301
ATP7A	B	-20.235	-36.372	-30.839
ATP7B	B	-38.986	-40.443	-39.329
ATP8A1	B	-24.867	-31.701	-35.173
ATP8A2	B	-18.712	-41.825	-34.739
ATP8B1	B	-35.094	-44.025	-41.737
ATP8B2	B	-22.506	-31.447	-29.768
ATP8B3	B	-23.608	-35.956	-46.082
ATP8B4	B	-25.636	-36.836	-36.553
ATP9A	B	-20.33	-25.641	-30.447
ATP9B	B	-15.929	-37.209	-33.863
ATPAF1	B	-17.129	-31.011	-50.052
ATPAF2	B		-12.353	-3.222
ATPAF2	B	6.418
ATPIF1	B	-7.652	-20.765	-31.937
ATR	B	20.173	28.756	30.512
ATRAID	B	-23.698	-32.31	-42.863
ATRN	B	-24.46	-18.973	-28.896
ATRNL1	B	-22.731	-19.311	-16.768
ATRX	B	-12.703	-33.742	-33.881
ATXN1	B	-19.74	-36	-21.002
ATXN10	B	8.697	17.782	16.12
ATXN1L	B	-30.506	-37.418	-36.173
ATXN2	B	-17.905	-24.131	-36.416
ATXN2L	B	-11.086	5.803	3.923
ATXN3	B	-32.777	-44.031	-41.304
ATXN3L	B	-32.323	-46.562	-44.865
ATXN7	B	-17.889	-36.601	-38.742
ATXN7L1	B	-25.744	-40.711	-35.78
ATXN7L2	B	-8.082	-23.592	-9.886
ATXN7L3	B	20.69	21.766	27.511
AUH	B	-24.362	-30.702	-28.068
AUNIP	B	-24.177	-17.043	-27.704
AUP1	B	-20.032	-26.081	-24.855
AURKA	B	9.005	9.201	17.776
AURKAIP1	B			2.903
AURKAIP1	B	8.159	6.347
AURKB	B	11.071	15.043	21.577
AURKC	B	-36.844	-34.866	-42.076
AUTS2	B	-23.94	-36.326	-30.12
AVEN	B	-3.402	-16.15	-28.108
AVIL	B	-0.583	-27.304	-32.708
AVL9	B	-35.788	-41.068	-45.143
AVP	B	-17.52	-31.237	-33.395
AVPI1	B	-32.274	-35.74	-39.346
AVPR1A	B	-26.384	-39.54	-41.611
AVPR1B	B	-32.725	-28.637	-26.902
AVPR2	B	-29.032	-31.447	-43.19
AWAT1	B	-15.31	-39.566	-43.85
AWAT2	B	-28.055	-30.547	-34.266
AXDND1	B	-16.436	-13.832	-36.127
AXIN1	B	-7.266	-27.848	-23.942
AXIN2	B	-25.158	-33.501	-40.619
AXL	B	-26.63	-41.983	-43.797
AZGP1	B	-26.659	-36.361	-37.497
AZI2	B	-27.783	-39.98	-44.26
AZIN1	B	-2.087		-10.416
AZIN1	B		15.584
AZIN2	B	-9.912	-21.108	-18.517
AZU1	B	-37.058	-41.463	-41.809
B2M	B	-21.302	-27.197	-31.964
B3GALNT1	B	-24.582	-44.218	-40.833
B3GALNT2	B	-25.563	-26.439	-35.919
B3GALT1	B	-28.44	-44.645	-36.298
B3GALT2	B	-15.786	-18.629	-31.237
B3GALT4	B	-16.171	-37.499	-26.706
B3GALT5	B	-23.862	-38.865	-41.007
B3GALT6	B	-34.806	-38.369	-38.12
B3GAT1	B	-28.041	-42.076	-43.872
B3GAT2	B	-0.111	-23.885	-35.325
B3GAT3	B	-0.572	-6.866	-4.037
B3GNT2	B	-41.264	-26.1	-13.583
B3GNT3	B	-29.946	-40.309	-22.065
B3GNT4	B	-19.575	-33.335	-21.187
B3GNT5	B	-23.244	-31.02	-46.425
B3GNT6	B	-10.758	-33.114	-21.448
B3GNT7	B	-21.895	-41.952	-32.422
B3GNT8	B	-21.96	-31.961	-35.031
B3GNT9	B	-24.849	-31.317	-37.179
B3GNTL1	B	-7.247	-21.421	-6.995
B4GALNT1	B	-23.871	-26.881	-25.458
B4GALNT2	B	-18.043	-39.499	-30.027
B4GALNT3	B	-22.258	-31.979	-20.427
B4GALNT4	B	-33.344	-41.931	-42.646
B4GALT1	B	-26.052	-43.636	-40.798
B4GALT2	B	-15.322	-22.573	-31.532
B4GALT3	B	-12.076	-3.624	-23.063
B4GALT4	B	-3.856	-23.337	-18.609
B4GALT5	B	-16.546	-24.818	-25.772
B4GALT6	B	-12.757	-25.259	-32.242
B4GALT7	B	-15.721	-15.905	-30.322
B4GAT1	B	0.155	-15.823	-38.189
B9D1	B	-19.402	-37.649	-29.725
B9D2	B	-22.02	-46.343	-36.753
BAALC	B	-26.389	-34.46	-35.341
BAAT	B	-20.62	-37.395	-28.767
BACE1	B	-17.49	-37.043	-22.619
BACE2	B	-38.701	-39.993	-45.393
BACH1	B	-18.171	-27.357	-28.86
BACH2	B	-28.899	-42.131	-23.216
BAD	B	-16.05	-39.413	-37.306
BAG1	B	1.652	-26.951	-21.491
BAG2	B	-7.961	-27.484	-39.01
BAG3	B	-20.046	-23.684	-25.739
BAG4	B	-20.263	-23.977	-36.263
BAG5	B	-29.444	-40.617	-42.188
BAG6	B	-8.076	-2.88
BAG6	B			6.38
BAHCC1	B	-16.351	-23.319	-30.641
BAHD1	B	-4.861	-29.645	-14.892
BAIAP2	B	-7.802	-38.749	-22.86
BAIAP2L1	B	-8.883	-30.463	-37.601
BAIAP2L2	B	-11.635	-31.436	-31.063
BAIAP3	B	-6.738	-19.979	-12.11
BAK1	B	-15.52	-34.708	-19.424
BAMBI	B	-25.77	-45.336	-46.112
BANF1	B	25.659	27.724	30.378
BANF2	B	-32.494	-40.633	-40.713
BANK1	B	-35.131	-45.518	-42.186
BANP	B	-2.509	-6.688	2.016
BAP1	B	16.517	25.316	18.611
BARD1	B	-3.756	3.03	-5.445
BARHL1	B	-20.851	-39.709	-38.392
BARHL2	B	-30.25	-29.312	-38.115
BARX1	B	-22.039	-30.934	-28.45
BARX2	B	-32.725	-39.768	-44.858
BASP1	B	-22.11	-41.684	-40.435
BATF	B	-24.422	-44.88	-38.94
BATF2	B	-24.512	-35.042	-17.23
BATF3	B	-13.38	-23.606	-42.888
BAX	B	-16.404	-39.237	-37.273
BAZ1A	B	-28.979	-29.153	-19.521
BAZ1B	B	-0.323	-25.162	-11.913
BAZ2A	B	1.178	-5.935
BAZ2A	B			6.723
BAZ2B	B	-25.406	-41.081	-31.76
BBC3	B	-25.286	-28.887	-30.775
BBIP1	B	-25.397	-43.3	-22.183
BBOF1	B	-30.774	-34.843	-41.803
BBOX1	B	-32.973	-33.931	-40.757
BBS10	B	-1.482	-19.224	-8.686
BBS12	B	-38.129	-43.399	-37.918
BBS2	B	-22.786	-26.278	-35.812
BBS4	B	-20.46	-31.439	-30.559
BBS7	B	-22.392	-39.25	-36.855
BBS9	B	-9.682	-36.177	-28.336
BBX	B	-24.136	-37.118	-38.329
BCAM	B	-12.693	-16.287	-22.133
BCAN	B	-7.072	-30.682	-28.391
BCAP29	B	-39.883	-44.212	-44.557
BCAP31	B	-19.737	-30.572	-27.106
BCAR1	B	-16.51	-15.121	-22.516
BCAR3	B	-21.275	-32.478	-20.927
BCAS1	B	-25.911	-47.406	-31.821
BCAS2	B	22.418	17.106	22.449
BCAS3	B	-21.098	-26.814	-39.033
BCAS4	B	-20.168	-18.444	-28.896
BCAT1	B	3.014	-22.367	-12.676
BCAT2	B	-23.993	-40.184	-31.004
BCCIP	B	18.499	19.301	25.628
BCDIN3D	B	-24.798	-31.164	-32.241
BCHE	B	-37.567	-46.829	-41.733
BCKDHB	B	-6.47	-30.199	-31.823
BCKDK	B	-17.036	-41.859	-35.578
BCL10	B	-20.834	-37.89	-28.734
BCL11A	B	-25.772	-40.337	-34.36
BCL11B	B	-23.723	-33.692	-35.132
BCL2	B	-21.351	-43.6	-34.377
BCL2A1	B	-16.432	-33.018	-27.566
BCL2L1	B	2.207	-8.195
BCL2L1	B			7.707
BCL2L10	B	-29.729	-41.854	-34.993
BCL2L11	B	-18.485	-33.756	-42.226
BCL2L12	B	-8.877	-43.794	-31.819
BCL2L13	B	-11.879	-42.538	-42.525
BCL2L14	B	-21.389	-33.07	-35.37
BCL2L15	B	-22.226	-33.089	-33.088
BCL3	B	-29.553	-26.333	-39.347
BCL6	B	-30.023	-33.659	-28.322
BCL6B	B	-31.029	-41.852	-37.692
BCL7A	B	-31.055	-40.209	-35.213
BCL7B	B	-27.945	-40.567	-42.223
BCL7C	B	-18.45	-24.076	-18.619
BCL9	B	-22.919	-37.581	-24.808
BCL9L	B	-2.892	-17.488	-21.289
BCLAF1	B	12.009	21.93	12.989
BCO1	B	-6.649	-32.943	-16.011
BCO2	B	-32.197	-13.807	-39.364
BCOR	B	-27.43	-39.823	-37.236
BCORL1	B	-25.625	-30.612	-41.066
BCR	B	-15.107	-22.894	-19.653
BCS1L	B	24.507	28.639	30.545
BDH1	B	-29.147	-40.257	-37.69
BDH2	B	-37.66	-34.095	-27.624
BDKRB1	B	-29.894	-33.111	-46.344
BDNF	B	-10.054	-43.39	-19.528
BDP1	B	15.245	19.847	25.185
BEAN1	B	-30.284	-45.326	-35.206
BECN1	B	1.329	-1.319	-2.571
BEGAIN	B	-30.159	-35.241	-43.474
BEND2	B	-35.13	-47.378	-46.632
BEND3	B	-20.023	-13.905	-31.115
BEND4	B	-20.397	-32.94	-26.502
BEND5	B	-27.646	-44.602	-42.454
BEND6	B	-31.941	-30.833	-23.149
BEND7	B	-31.274	-27.457	-28.816
BEST1	B	-31.498	-42.455	-31.55
BEST2	B	-1.636	-22.186	-22.56
BEST3	B	-25.951	-33.775	-37.919
BEST4	B	-11.595	-33.763	-32.043
BET1	B	-6.234	-6.079	-21.771
BET1L	B	-30.778	-39.065	-41.294
BEX1	B	-30.56	-38.265	-37.37
BEX2	B	-26.879	-38.263	-44.548
BEX3	B	-24.44	-42.266	-29.378
BEX4	B	-25.407	-27.554	-26.342
BEX5	B	-35.198	-40.993	-35.637
BFAR	B	-24.267	-32.005	-38.109
BFSP1	B	-32.535	-35.271	-34.455
BFSP2	B	-33.552	-40.347	-45.654
BGLAP	B	-20.286	-32.162	-24.452
BGN	B	-21.763	-30.62	-45.069
BHLHA15	B	-19.917	-28.844	-24.846
BHLHA9	B	-35.633	-38.953	-34.464
BHLHB9	B	-18.57	-36.149	-41.924
BHLHE22	B	-22.859	-44.991	-41.51
BHLHE23	B	-30.569	-43.579	-36.819
BHLHE40	B	-8.261	-41.042	-31.619
BHLHE41	B	-30.04	-34.949	-35.286
BHMT	B	-21.626	-30.465	-28.024
BHMT2	B	-24.222	-42.952	-38.262
BICC1	B	-10.723	-28.197	-24.818
BICD1	B	-7.752	-28.806	-26.744
BICD2	B	-27.406	-32.293	-32.29
BICDL1	B	-20.685	-29.178	-36.394
BICDL2	B	-5.525	-20.33	-12.395
BID	B	-0.758	-9.214	-12.679
BIK	B	-29.701	-44.129	-49.099
BIN1	B	-18.828	-26.59	-32.325
BIN2	B	-22.967	-32.974	-30.921
BIN3	B	-11.976	-23.43	-34.128
BIRC2	B	-27.272	-37.422	-36.375
BIRC3	B	-18.954	-35.143	-33.452
BIRC5	B	25.087	28.452	30.356
BIRC6	B	-26.976	-38.63	-32.929
BIRC7	B	-20.558	-39.629	-35.307
BIRC8	B	-27.755	-27.076	-38.912
BLCAP	B	-24.373	-26.205	-23.795
BLID	B	-28.982	-39.236	-42.798
BLK	B	-16.857	-45.077	-30.954
BLM	B	2.728	5.128	5.35
BLMH	B	-22.208	-41.522	-20.638
BLNK	B	-18.605	-29.851	-41.972
BLOC1S2	B	-22.789	-36.329	-34.877
BLOC1S3	B	-22.284	-37.721	-44.328
BLOC1S4	B	-19.721	-32.676	-35.08
BLVRA	B	-24.063	-41.805	-26.454
BLVRB	B	-28.538	-39.745	-24.511
BLZF1	B	-8.729	-28.628	-32.826
BMF	B	-17.733	-38.579	-39.254
BMP1	B	-30.976	-36.13	-36.169
BMP10	B	-33.603	-38.809	-35.592
BMP15	B	-32.803	-43.031	-42.174
BMP2	B	-27.017	-24.686	-37.613
BMP2K	B	-25.24	-39.045	-46.81
BMP3	B	-36.355	-45.473	-39.757
BMP4	B	-19.409	-40.986	-35.757
BMP5	B	-27.566	-29.756	-38.609
BMP6	B	-23.247	-32.516	-37.822
BMP7	B	-26.289	-40.395	-40.403
BMP8A	B	-14.524	-38.972	-34.965
BMP8B	B	-21.917	-37.117	-39.715
BMPER	B	-22.143	-41.713	-39.367
BMPR1A	B	-10.769	-11.151	-19.745
BMPR1B	B	-22.055	-26.883	-20.105
BMPR2	B	-32.486	-38.226	-44.367
BMS1	B	11.391	17.925	19.712
BMT2	B	-24.438	-42.875	-24.219
BMX	B	-31.753	-37.6	-35.486
BNC1	B	-17.864	-11.962	-20.924
BNC2	B	-34.037	-43.859	-36.815
BNIP1	B		5.61	-3.384
BNIP1	B	9.502
BNIP2	B	-13.237	-25.078	-37.028
BNIP3	B	-11.675	-20.622	-16.224
BNIP3L	B	-30.317	-37.955	-42.539
BNIPL	B	-17.447	-40.357	-26.597
BOC	B	-12.035	-34.368	-37.489
BOD1	B	-29.5	-42.305	-40.942
BOD1L1	B	-14.636	-7.406	-22.106
BOD1L2	B	-41.671	-42.143	-44.342
BOK	B	-30.74	-45.517	-41.919
BOLA1	B	-24.268	-29.454	-17.354
BOLA3	B	-4.71	-10.557	-12.646
BOLL	B	-1.563	-29.735	-20.952
BOP1	B	21.73	25.255	16.862
BORA	B	-4.803	3.061	-5.697
BORCS5	B	-32.02	-36.626	-28.111
BORCS6	B	-19.106	-27.971	-18.556
BPGM	B	-33.007	-38.392	-36.133
BPHL	B	-24.45	-42.303	-42.027
BPI	B	-27.591	-30.111	-12.922
BPIFA1	B	-24.218	-40.286	-42.338
BPIFA2	B	-12.171	-22.638	-9.086
BPIFA3	B	-16.348	-26.981	-30.027
BPIFB1	B	-19.316	-40.934	-25.391
BPIFB2	B	-17.944	-30.558	-19.426
BPIFB3	B	-22.171	-35.358	-27.603
BPIFB4	B	-12.597	-26.433	-40.117
BPIFB6	B	-24.107	-42.172	-39.442
BPIFC	B	-25.464	-43.25	-37.867
BPNT1	B	-29.247	-35.822	-40.269
BPTF	B	5.982	5.445	5.953
BRAF	B	-31.158	-42.05	-26.52
BRAP	B	-15.96	-27.478	-35.308
BRAT1	B	2.079
BRAT1	B		10.73	20.35
BRCA1	B	19.982	14.228	24.78
BRCA2	B	18.27	23.417	19.649
BRCC3	B	-1.194	-19.163	-20.605
BRD1	B	-6.169
BRD1	B		18.397	10.752
BRD2	B	-0.099	-7.59	-2.657
BRD3	B	-12.455	-22.257	-27.402
BRD4	B	6.229	16.121	25.072
BRD7	B	-5.484	-27.533	-33.515
BRD8	B	-7.865	1.189	0.346
BRD9	B	-14.754	-42.097	-42.779
BRDT	B	-34.143	-33.99	-30.672
BRF1	B	16.761	27.645	28.835
BRF2	B	21.61	24.249	21.615
BRI3	B	-25.14	-36.541	-37.015
BRI3BP	B	-7.871	-27.254	-37.241
BRICD5	B	-14.886	-17.722	-23.261
BRINP1	B	-26.025	-39.699	-35.602
BRINP2	B	-36.103	-24.87	-35.612
BRINP3	B	-24.53	-29.383	-31.758
BRIP1	B	15.624	10.985	21.441
BRIX1	B	7.733	23.941	24.968
BRK1	B	-13.598	-19.239	-17.609
BRMS1	B	-2.178	-33.234	-20.633
BRMS1L	B	-31.537	-41.276	-34.493
BROX	B	-36.098	-46.592	-40.779
BRPF1	B	-22.166	-30.564	-17.826
BRPF3	B	-16.7	-39.611	-34.037
BRS3	B	-37.929	-37.957	-41.239
BRSK1	B	-22.996	-30.645	-32.4
BRSK2	B	-26.69	-40.428	-32.362
BRWD1	B	-24.318	-44.396	-37.737
BRWD3	B	-28.948	-36.547	-34.896
BSCL2	B	2.895	-16.155	-22.877
BSDC1	B	-19.458	-18.608	-26.199
BSG	B	-9.693	-14.19
BSG	B			13.042
BSN	B	-31.979	-40.853	-29.081
BSND	B	-16.247	-29.12	-19.037
BSPH1	B	-30.535	-39.175	-38.572
BSPRY	B	-22.108	-38.627	-25.523
BST1	B	-25.2	-44.439	-43.113
BST2	B	-9.124	-28.981	-36.042
BSX	B	-35.349	-37.435	-43.946
BTAF1	B		-4.587	4.714
BTAF1	B	11.746
BTBD1	B	-12.222	-33.399	-18.602
BTBD10	B	-30.21	-41.761	-48.325
BTBD11	B	-27.673	-43.24	-45.369
BTBD16	B	-25.923	-34.18	-39.145
BTBD17	B	-26.098	-41.907	-29.179
BTBD19	B	-15.982	-34.261	-22.679
BTBD2	B	-30.967	-41.541	-40.318
BTBD3	B	-32.517	-40.496	-42.968
BTBD6	B	-22.489	-36.616	-43.53
BTBD7	B	-26.301	-29.122	-35.291
BTBD9	B	-10.037	-20.202	-25.455
BTC	B	-32.617	-35.222	-34.16
BTD	B	-21.238	-40.103	-41.521
BTF3	B	-0.185	3.364	0.522
BTF3L4	B	4.801	-6.615	5.632
BTG1	B	-35.085	-39.185	-41.296
BTG2	B	-11.629	-39.668	-28.762
BTG3	B	-12.696	-30.238	-16.195
BTG4	B	-33.472	-45.778	-45.802
BTK	B	-26.194	-36.63	-40.665
BTLA	B	-28.325	-44.366	-39.653
BTN1A1	B	-24.281	-19.78	-38.932
BTN2A1	B	-22.279	-33.454	-41.719
BTN2A2	B	-33.282	-46.881	-46.268
BTN3A1	B	-29.9	-39.134	-45.42
BTN3A2	B	-33.043	-35.668	-39.272
BTN3A3	B	-9.212	-20.273	-26.642
BTNL2	B	-27.523	-38.624	-40.023
BTNL3	B	-30.389	-27.282	-26.311
BTNL8	B	-19.86	-35.283	-19.668
BTNL9	B	-24.392	-38.75	-34.892
BTRC	B	-18.012	-36.643	-37.985
BUB1	B		0.423	-7.12
BUB1	B	10.324
BUB1B	B	-0.372	-15.392	2.506
BUB3	B	20.823	24.081	27.813
BUD13	B	19.496	15.783	9.335
BUD31	B	23.843	27.909	30.247
BVES	B	-8.928	-44.767	-28.341
BYSL	B	8.996	17.444	8.347
BZW1	B	-10.219	-24.163	-32.475
BZW2	B	-29.845	-42.96	-37.253
C10orf10	B	-20.348	-39.052	-30.987
C10orf105	B	-22.952	-33.879	-31.675
C10orf107	B	-16.653	-31.739	-27.523
C10orf113	B	-33.675	-36.669	-50.412
C10orf120	B	-21.698	-24.891	-46.637
C10orf128	B		-21.777	-8.772
C10orf128	B	16.887
C10orf35	B	-23.267	-31.96	-31.434
C10orf53	B	-23.409	-26.139	-39.463
C10orf55	B	-16.331	-26.977	-15.659
C10orf62	B	-31.829	-39.58	-36.547
C10orf67	B	-32.668	-40.12	-31.425
C10orf71	B	-20.196	-33.752	-41.632
C10orf76	B	-14.669	-0.325	-29.799
C10orf82	B	-28.983	-45.727	-34.327
C10orf88	B	-20.276	-34.871	-35.509
C10orf90	B	-31.179	-33.491	-46.536
C10orf99	B	-29.467	-31.082	-43.241
C11orf1	B	-13.851	-34.957	-27.441
C11orf16	B	-26.457	-39.534	-33.056
C11orf21	B	-17.643	-32.704	-44.385
C11orf24	B		-35.857	-25.274
C11orf24	B	12.158
C11orf40	B	-38.566	-38.305	-31.006
C11orf42	B	-15.586	-23.443	-33.852
C11orf45	B	-35.661	-44.992	-40.724
C11orf49	B	-18.724	-27.866	-14.175
C11orf52	B	-35.163	-40.653	-33.047
C11orf53	B	-14.247	-26.169	-29.501
C11orf57	B	-2.583		-1.008
C11orf57	B		11.233
C11orf58	B	-11.289	-34.532	-40.45
C11orf63	B	-29.553	-41.126	-43.066
C11orf65	B	-26.917	-38.399	-26.796
C11orf68	B	-13.833	-42.234	-38.12
C11orf70	B	-34.414	-41.88	-37.608
C11orf71	B	-19.397	-40.674	-47.977
C11orf74	B	-12.978	-32.896	-28.238
C11orf80	B	-18.767	-32.663	-36.26
C11orf84	B	-13.872	-39.35	-22.831
C11orf86	B	-6.627	-32.564	-28.966
C11orf87	B	-22.375	-39.109	-28.013
C11orf88	B	-28.864	-40.367	-44.391
C11orf91	B	-20.243	-34.747	-23.797
C11orf94	B	-17.25	-32.945	-27.392
C11orf96	B	-28.969	-37.768	-23.864
C12orf10	B	-24.014	-39.067	-33.737
C12orf29	B	-24.076	-34.084	-36.222
C12orf4	B	-22.808	-18.181	-41.94
C12orf40	B	-15.759	-32.206	-27.283
C12orf42	B	-12.988	-28.916	-39.955
C12orf43	B	-24.804	-31.652	-36.512
C12orf45	B	13.987	10.641	25.58
C12orf49	B	-8.65	-42.48	-33.868
C12orf50	B	-7.406	-30.467	-30.447
C12orf56	B	-21.132	-14.842	-26.654
C12orf57	B	-24.001	-30.492	-27.827
C12orf60	B	-24.418	-33.201	-42.844
C12orf65	B	-13.102	-26.8	-10.381
C12orf66	B	-31.362	-48.353	-31.507
C12orf71	B	-23.967	-31.356	-37.78
C12orf73	B	-14.376	-36.828	-35.257
C12orf75	B	-18.297	-33.772	-38.276
C12orf76	B	-24.328	-37.715	-35.415
C14orf1	B	-19.225	-39.305	-39.391
C14orf105	B	-3.373	-20.734	-38.051
C14orf119	B	-1.51	-1.871	-32.862
C14orf132	B	-20.379	-28.314	-26.955
C14orf159	B	-31.587	-24.482	-32.925
C14orf166	B	-7.261
C14orf166	B		13.811	11.376
C14orf177	B	-8.895	-14.785	-26.406
C14orf178	B	-16.077	-38.843	-33.43
C14orf180	B	-21.066	-34.222	-36.789
C14orf2	B	-22.537	-15.774	0.352
C14orf37	B	-5.221	-38.272	-46.725
C14orf39	B	-11.043	-2.804	-26.6
C14orf79	B	-30.484	-34.634	-45.011
C14orf80	B	27.502	17.401	26.81
C14orf93	B	-13.702	-25.062	-26.122
C15orf39	B	4.26	-15.722
C15orf39	B			7.003
C15orf40	B	-4.182	-19.302	-5.914
C15orf41	B	22.445	28.713	29.092
C15orf52	B	-13.31	-26.776	-23.847
C15orf53	B	-29.099	-35.492	-32.835
C15orf57	B			2.122
C15orf57	B	9.118	22.773
C15orf59	B	-20.344	-40.224	-26.464
C15orf61	B	-10.655	-27.09	-18.921
C15orf62	B	-18.889	-28.911	-27.269
C15orf65	B	-30.875	-29.418	-36.151
C16orf45	B	-19.918	-32.549	-41.187
C16orf46	B	-15.263	-38.702	-21.664
C16orf52	B	-7.258	-30.088	-15.458
C16orf54	B	-20.358	-37.925	-25.48
C16orf58	B	2.132	-27.698	-26.837
C16orf59	B	2.71		4.54
C16orf59	B		14.32
C16orf62	B	2.198	-13.173	-19.212
C16orf70	B	-21.015	-28.4	-12.998
C16orf71	B	-23.079	-29.883	-36.596
C16orf72	B	-16.358	-25.21	-18.812
C16orf74	B	-34.813	-44.692	-42.35
C16orf78	B	-23.501	-31.864	-27.566
C16orf86	B	-23.581	-35.326	-33.519
C16orf87	B	-25.29	-35.348	-40.987
C16orf89	B	-17.896	-26.111	-17.332
C16orf90	B	-9.689	-31.375	-27.908
C16orf91	B	-27.443	-42.238	-31.43
C16orf92	B	-17.852	-27.662	-22.683
C16orf96	B	-25.209	-35.627	-21.346
C17orf100	B	-21.088	-38.227	-21.343
C17orf105	B	-13.764	-27.98	-31.308
C17orf107	B	-14.114	-31.446	-25.778
C17orf47	B	-24.712	-29.012	-31.574
C17orf50	B	-13.032	-32.749	-28.309
C17orf51	B	-13.28	-26.342	-28.154
C17orf53	B	5.692	-0.644	-5.318
C17orf58	B	-16.528	-30.69	-10.732
C17orf62	B	-20.3	-30.505	-33.236
C17orf64	B	-39.238	-41.813	-41.866
C17orf67	B	-13.421	-35.005	-31.994
C17orf74	B	-15.902	-34.946	-21.372
C17orf75	B	-19.898	-40.45	-40.186
C17orf78	B	-23.45	-24.3	-30.995
C17orf80	B	-27.109	-45.842	-37.755
C17orf97	B	-31.212	-42.805	-44.43
C17orf98	B	4.322	-11.197	-9.435
C17orf99	B	-15.912	-36.129	-33.968
C18orf21	B	-3.927	-4.498	-3.864
C18orf25	B	-19.086	-39.232	-39.485
C18orf54	B	-37.452	-39.112	-45.074
C18orf63	B	-26.754	-40.621	-44.937
C18orf8	B	-16.504	-21.272	-31.195
C19orf12	B	-7.44	-24.293	-11.935
C19orf18	B	-27.043	-32.618	-42.1
C19orf24	B	-16.401	-35.261	-33.693
C19orf25	B	-29.811	-37.929	-39.237
C19orf35	B	-24.845	-35.431	-36.169
C19orf38	B	-20.974	-26.43	-36.218
C19orf43	B			1.276
C19orf43	B	18.487	6.753
C19orf44	B	-14.371	-26.89	-30.349
C19orf47	B	-29.522	-35.733	-41.197
C19orf48	B	-26.652	-39.323	-43.896
C19orf53	B	-0.337	-13.697	-11.783
C19orf54	B	-1.511	-32.772	-30.301
C19orf57	B	-26.938	-32.018	-21.524
C19orf60	B	-24.016	-33.248	-26.754
C19orf66	B	-29.698	-41.837	-31.884
C19orf67	B	-30.671	-41.899	-40.551
C19orf68	B	-24.389	-43.053	-33.539
C19orf70	B	-5.995	-28.911	-16.125
C19orf71	B	-17.862	-32.501	-22.777
C19orf73	B	-7.115	-19.494	-19.214
C19orf81	B	-14.289	-32.594	-38.932
C19orf84	B	-24.913	-25.486	-36.634
C1D	B		-3.57	-8.578
C1D	B	6.001
C1GALT1	B	-20.07	-32.757	-28.795
C1GALT1C1	B	-35.439	-46.494	-32.686
C1orf100	B	-28.843	-29.078	-38.127
C1orf105	B	-29.223	-41.391	-28.605
C1orf106	B	-18.112	-22.581	-32.75
C1orf109	B	28.357	28.677	30.636
C1orf112	B	-2.333	-10.812	-10.387
C1orf115	B	-37.996	-47.276	-43.833
C1orf116	B	-28.631	-44.412	-32.628
C1orf122	B	-24.153	-25.055	-38.56
C1orf123	B	-22.235	-36.896	-31.36
C1orf127	B	-11.286	-23.604	-18.125
C1orf131	B	-14.063	-14.618	-13.042
C1orf141	B	-20.73	-28.271	-22.807
C1orf146	B	-33.1	-36.41	-44.216
C1orf158	B	-19.296	-38.982	-39.28
C1orf159	B	-31.228	-43.248	-45.308
C1orf162	B	-14.79	-23.463	-1.406
C1orf167	B	-31.707	-35.705	-26.535
C1orf168	B	-27.119	-32.311	-32.664
C1orf174	B	-28.72	-43.76	-39.284
C1orf185	B	-26.475	-34.326	-36.681
C1orf186	B	-31.223	-37.056	-37.046
C1orf189	B	-31.62	-45.355	-38.815
C1orf194	B	-13.94	-38.648	-35.427
C1orf198	B	-28.865	-29.694	-33.326
C1orf21	B	-0.254	-33.46	-17.312
C1orf210	B	-29.677	-42.938	-43.244
C1orf216	B	-14.561	-26.145	-18.493
C1orf226	B	-14.415	-17.572	-22.066
C1orf228	B	-18.461	-28.292	-35.054
C1orf27	B	-31.925	-17.154	-28.648
C1orf35	B	-34.424	-39.727	-36.518
C1orf43	B	-23.708	-28.779	-42.111
C1orf50	B	-27.366	-29.919	-39.7
C1orf52	B	-12.084	-44.293	-15.458
C1orf53	B	-19.929	-28.015	-25.999
C1orf54	B	-24.619	-29.149	-31.035
C1orf56	B	-23.319	-25.629	-25.759
C1orf61	B	-14.275	-26.536	-37.585
C1orf64	B	-13.889	-36.225	-37.718
C1orf68	B	-19.268	-29.536	-39.498
C1orf74	B	-23.425	-29.221	-41.44
C1orf87	B	-29.49	-40.463	-38.574
C1orf94	B	-21.782	-33.745	-42.998
C1QA	B	-20.677	-37.921	-41.226
C1QB	B	-0.129	-9.313	-15.841
C1QBP	B	13.523	16.124	23.324
C1QC	B	-15.854	-21.241	-24.729
C1QL1	B	-17.994	-38.87	-38.164
C1QL2	B	-11.013	-35.374	-38.119
C1QL3	B	-19.037	-35.337	-31.252
C1QL4	B	-20.176	-36.978	-27.178
C1QTNF1	B	-20.044	-30.134	-38.362
C1QTNF2	B	-31.517	-46.805	-33.301
C1QTNF4	B	0.806	-29.965	-17.973
C1QTNF5	B	-28.987	-28.5	-26.615
C1QTNF6	B	-19.609	-24.648	-31.719
C1QTNF7	B	-29.638	-43.1	-46.44
C1QTNF8	B	-15.748	-25.03	-36.055
C1QTNF9	B	-7.836	-28.363	0.4
C1R	B	-20.71	-41.579	-36.174
C1RL	B	-32.632	-35.347	-38.232
C1S	B	-17.02	-41.508	-31.336
C20orf144	B	-2.203	-31.185	-31.766
C20orf173	B	-23.011	-20.388	-25.494
C20orf194	B	-30.716	-43.581	-37.545
C20orf196	B	-15.63	-24.527	-16.078
C20orf202	B	-22.975	-38.209	-39.432
C20orf24	B	-26.821	-30.339	-23.586
C20orf27	B	-25.505	-31.734	-27.543
C20orf85	B	-25.611	-32.228	-36.613
C20orf96	B	-22.974	-38.745	-41.93
C21orf140	B	-29.16	-41.096	-34.446
C21orf2	B	-16.072	-35.09	-32.677
C21orf33	B	-28.242	-38.835	-36.5
C21orf58	B	-11.164	-39.18	-23.559
C21orf62	B	-25.713	-38.942	-38.785
C21orf91	B	-19.449	-35.116	-25.428
C22orf15	B	-30.494	-37.565	-36.381
C22orf23	B	-10.192	-33.957	-32.559
C22orf29	B	-25.685	-37.873	-30.671
C22orf31	B	-28.276	-27.931	-30.027
C22orf39	B	-17.193	-35.198	-21.358
C22orf42	B	-32.778	-40.908	-37.218
C22orf46	B	-23.307	-43.052	-31.019
C2CD2	B	-32.963	-26.381	-42.436
C2CD2L	B	-23.831	-37.846	-45.179
C2CD3	B	-15.781	-31.226	-33.497
C2CD4A	B	-2.252	-21.024	-17.223
C2CD4B	B	-26.525	-28.188	-32.975
C2CD4C	B	-12.719	-27.87	-31.731
C2CD4D	B	-20.252	-30.992	-28.94
C2CD5	B	-36.403	-46.394	-40.804
C2orf15	B	-26.458	-31.397	-23.738
C2orf16	B	-31.127	-44.753	-40.85
C2orf40	B	-26.561	-36.244	-32.806
C2orf42	B	-17.549	-36.374	-41.877
C2orf49	B		3.137	-24.703
C2orf49	B	7.306
C2orf50	B	-27.269	-37.795	-47.132
C2orf54	B	-24.305	-39.217	-43.968
C2orf66	B	-28.697	-42.392	-37.093
C2orf68	B		-11.361	-9.399
C2orf68	B	9.403
C2orf69	B	-20.251	-29.048	-38.571
C2orf70	B	-32.457	-38.081	-28.17
C2orf71	B	-25.525	-21.514	-36.278
C2orf72	B	-17.752	-42.501	-40.088
C2orf73	B	-27.662	-33.76	-40.705
C2orf74	B	-18.94	-39.395	-34.41
C2orf76	B	-2.073	-10.33	-7.185
C2orf78	B	-29.716	-40.554	-36.99
C2orf80	B	-22.854	-39.67	-36.233
C2orf81	B	-13.876	-7.745	-10.596
C2orf82	B	-35.454	-41.586	-42.223
C2orf83	B	-19.187	-35.546	-41.187
C2orf88	B	-22.199	-35.903	-27.197
C2orf91	B	-16.123	-25.974	-27.861
C3	B	-26.987	-38.025	-33.636
C3AR1	B	-10.221	-36.053	-41.887
C3orf14	B	-17.531	-22.432	-25.852
C3orf18	B	-26.816	-28.851	-30.873
C3orf20	B	-19.341	-38.009	-38.805
C3orf22	B	-33.171	-37.987	-32.122
C3orf30	B	-35.356	-40.44	-42.108
C3orf33	B	-26.878	-31.712	-41.353
C3orf38	B	-25.005	-34.989	-35.004
C3orf52	B		-39.952	-28.481
C3orf52	B	10.89
C3orf58	B	-29.643	-32.818	-34.061
C3orf62	B	-13.868	-36.565	-32.9
C3orf67	B	-18.984	-44.744	-39.62
C3orf70	B	-39.651	-43.776	-42.838
C3orf80	B	-21.09	-44.615	-33.819
C3orf84	B	-6.927	-28.423	-26.198
C4A	B	-30.034	-42.082	-43.658
C4B	B	-38.087	-46.129	-42.985
C4BPA	B	-36.301	-42.244	-36.955
C4BPB	B	-14.112	-27.021	-27.554
C4orf17	B	-21.81	-41.05	-41.843
C4orf19	B	-16.409	-36.612	-27.657
C4orf22	B	-11.772	-29.984	-35.84
C4orf26	B		-20.056	-5.881
C4orf26	B	12.316
C4orf3	B	-32.866	-29.52	-30.912
C4orf33	B	-28.652	-44.647	-39.229
C4orf36	B	-27.7	-43.861	-30.888
C4orf45	B	-36.688	-42.794	-44.522
C4orf46	B	-22.427	-30.037	-16.446
C4orf47	B	-23.193	-33.779	-24.027
C4orf48	B	-18.676	-41.961	-35.139
C4orf50	B	-11.873	-34.777	-27.93
C4orf51	B	-2.679	-40.102	-30.174
C5	B	-12.79	-23.931	-26.082
C5AR1	B	-4.873	-28.649	-14.91
C5AR2	B	-22.446	-43.275	-31.72
C5orf15	B	-23.319	-33.446	-37.223
C5orf22	B	-13.914	-36.464	-26.909
C5orf24	B	-29.123	-32.065	-38.835
C5orf30	B	-21.861	-39.018	-34.838
C5orf34	B	-9.604	-17.793	-12.52
C5orf38	B	-34.869	-22.057	-32.993
C5orf42	B	-31.087	-26.384	-25.962
C5orf46	B	-24.32	-41.422	-37.498
C5orf47	B	-33.259	-40.095	-44.652
C5orf49	B	-30.621	-41.409	-40.529
C5orf51	B	-15.883	-34.994	-47.785
C5orf52	B	-23.699	-41.532	-40.603
C5orf63	B	-37.792	-35.819	-38.142
C6	B	-31.404	-33.823	-31.356
C6orf10	B	-26.088	-22.294	-34.929
C6orf106	B	-19.344	-38.958	-26.007
C6orf118	B	-37.616	-37.36	-46.609
C6orf120	B	-12.922	-26.241	-43.06
C6orf132	B	-33.944	-20.066	-10.924
C6orf136	B	-31.213	-40.632	-50.714
C6orf141	B	-30.253	-27.418	-36.948
C6orf15	B	-19.213	-36.5	-28.523
C6orf163	B	-5.532	-28.81	-32.441
C6orf201	B	-9.801	-44.116	-43.198
C6orf203	B	-11.983	-28.024	-26.953
C6orf222	B	-23.758	-27.526	-35.498
C6orf223	B	-33.92	-41.977	-42.042
C6orf226	B	-2.946	-30.119	-26.497
C6orf47	B	-11.722	-15.487	-12.729
C6orf48	B	-3.543	-28.839	-27.445
C6orf52	B	-32.817	-42.26	-43.39
C6orf58	B	-32.574	-41.71	-39.959
C6orf62	B	-30.599	-39.892	-46.044
C6orf89	B	-30.123	-30.554	-43.418
C7	B	-24.731	-28.079	-24.423
C7orf25	B	-35.81	-38.647	-42.845
C7orf26	B	17.87	27.3	27.704
[truncated: 16,215 more rows]
